# Supplementary material
Source: ML conference proceedings conference paper supplement (https://openreview.net/forum?id=CEjuyeZj1jz)
Supplement: supplementary_material [file attachment]

---

# Finite-Time Analysis of Fully Decentralized Single-Timescale Actor-Critic

---

Anonymous Author(s)

Affiliation

Address

email

## Abstract

1 Decentralized Actor-Critic (AC) algorithms have been widely utilized for multi-  
2 agent reinforcement learning (MARL) and have achieved remarkable success.  
3 Apart from its empirical success, the theoretical convergence property of decentral-  
4 ized AC algorithms is largely unexplored. The existing finite-time convergence  
5 results are derived based on either double-loop update or two-timescale step sizes  
6 rule, which is not often adopted in real implementation. In this work, we introduce  
7 a fully decentralized AC algorithm, where actor, critic, and global reward estimator  
8 are updated in an alternating manner with step sizes being of the same order, namely,  
9 we adopt the *single-timescale* update. Theoretically, using linear approximation for  
10 value and reward estimation, we show that our algorithm has sample complexity of  
11  $\tilde{\mathcal{O}}(\epsilon^{-2})$  under Markovian sampling, which matches the optimal complexity with  
12 double-loop implementation (here,  $\tilde{\mathcal{O}}$  hides a log term). The sample complexity  
13 can be improved to  $\mathcal{O}(\epsilon^{-2})$  under the i.i.d. sampling scheme. The central to  
14 establishing our complexity results is *the hidden smoothness of the optimal critic*  
15 *variable* we revealed. We also provide a local action privacy-preserving version  
16 of our algorithm and its analysis. Finally, we conduct experiments to show the  
17 superiority of our algorithm over the existing decentralized AC algorithms.

## 18 1 Introduction

19 Multi-agent reinforcement learning (MARL) [16, 30] has been very successful in various models of  
20 multi-agent systems, such as robotics [14], autonomous driving [37], Go [25], etc. MARL has been  
21 extensively explored in the past decades; see, e.g., [18, 20, 41, 26, 8, 22]. These works either focus  
22 on the setting where a central controller is available, or assuming a common reward function for all  
23 agents. Among the many cooperative MARL settings, the work [42] proposes the fully decentralized  
24 MARL with networked agents. In this setting, each agent maintains a private heterogeneous reward  
25 function, and agents can only access local/neighbors information through communicating with its  
26 neighboring agents on the network. Then, the objective of all agents is to jointly maximize the average  
27 long-term reward through interacting with environment modeled by multi-agent Markov decision  
28 process (MDP). They proposed the decentralized Actor-Critic (AC) algorithm to solve this MARL  
29 problem, and showed its impressive performance. However, the theoretical convergence properties  
30 of such class of decentralized AC algorithms are largely unexplored; see [41] for a comprehensive  
31 survey. In this work, our goal is to establish the strong finite-time convergence results under this fully  
32 decentralized MARL setting. We first review some recent progresses on this line of research below.

33 **Related works and motivations.** The first fully decentralized AC algorithm with provable con-  
34 vergence guarantee was proposed by [42], and they achieved asymptotic convergence results under  
35 two-time scale step sizes, which requires actor's step sizes to diminish in a faster scale than the critic's  
36 step sizes. The sample complexities of decentralized AC were established recently. In particular, [6]

37 and [11] independently propose two communication efficient decentralized AC algorithms with opti-  
 38 mal sample complexity of  $\mathcal{O}(\varepsilon^{-2} \log(\varepsilon^{-1}))$  under Markovian sampling scheme. Their analysis are  
 39 based on *double-loop* implementation, where each policy optimization step follows a nearly accurate  
 40 critic optimization step (a.k.a. policy evaluation), i.e., solving the critic optimization subproblem to  
 41  $\varepsilon$ -accuracy. Such a double-loop scheme requires careful tuning of two additional hyper-parameters,  
 42 which are the batch size and inner loop size. In particular, the batch size and inner loop size need to be  
 43 of order  $\mathcal{O}(\varepsilon^{-1})$  and  $\mathcal{O}(\log(\varepsilon^{-1}))$  in order to achieve their sample complexity results, respectively.  
 44 In practice, single-loop algorithmic framework is often utilized, where one updates the actor and  
 45 critic in an alternating manner by performing only one algorithmic iteration for both of the two  
 46 subproblems; see, e.g., [23, 18, 15, 39]. The work [38] proposes a new decentralized AC algorithm  
 47 based on such a single-loop alternative update. Nevertheless, they have to adopt *two-timescale* step  
 48 sizes rule to ensure convergence, which requires actor’s step sizes to diminish in a faster scale than  
 49 the critic’s step sizes. Due to the separation of the step sizes, the critic optimization sub-problem  
 50 is solved exactly when the number of iterations tends to  $\infty$ . Such a restriction on the step size will  
 51 slow down the convergence speed of the algorithm. As a consequence, they only obtain sub-optimal  
 52 sample complexity of  $\mathcal{O}(\varepsilon^{-\frac{5}{2}})$ . In practice, most algorithms are implemented with *single-timescale*  
 53 step size rule, where the step sizes for actor and critic updates are of the same order. Though there  
 54 are some theoretical achievements for single-timescale update in other areas such as TDC [31] and  
 55 bi-level optimization [4], similar theoretical understanding under AC setting is largely unexplored.

56 Indeed, even when reducing to single-agent setting, the convergence property of single-timescale  
 57 AC algorithm is not well established. The works [9, 10] establish the finite-time convergence result  
 58 under a special single-timescale implementation, where they attain the sample complexity of  $\mathcal{O}(\varepsilon^{-2})$ .  
 59 However, their analysis is based on an algorithm where the critic optimization step is formulated as a  
 60 least-square temporal difference (LSTD) at each iteration, where they need to sample the transition  
 61 tuples for  $\tilde{\mathcal{O}}(\varepsilon^{-1})$  times to form the data matrix in the LSTD problem. Then, they solve the LSTD  
 62 problem in a closed-form fashion, which requires to invert a matrix of large size. Later, [4] obtains the  
 63 same sample complexity using TD(0) update for critic variables under i.i.d. sampling. Nonetheless,  
 64 their analysis highly relies on the assumption that the Jacobian of the stationary distribution is  
 65 Lipschitz continuous, which is not justified in their work.

66 The above observations motivate us to ask the following question:

67 *Can we establish finite-time convergence result for decentralized AC algorithm with single-timescale*  
 68 *step sizes rule?*<sup>1</sup>

69 **Main contributions.** By answering this question positively, we have the following contributions:

- 70 • We design a fully decentralized AC algorithm, which employs a *single-timescale* step sizes  
 71 rule and adopts Markovian sampling scheme. The proposed algorithm allows communication  
 72 between agents for every  $K_c$  iterations with  $K_c$  being any integer lies in  $[1, \mathcal{O}(\varepsilon^{-\frac{1}{2}})]$ , rather  
 73 than communicating at each iteration as adopted by previous single-loop decentralized AC  
 74 algorithms [38, 42].
- 75 • Using linear approximation for value and reward estimation, we establish the *finite-time*  
 76 convergence result for such an algorithm under the standard assumptions. In particular, we  
 77 show that the algorithm has the sample complexity of  $\tilde{\mathcal{O}}(\varepsilon^{-2})$ , which matches the optimal  
 78 complexity up to a logarithmic term. In addition, we show that the logarithmic term can be  
 79 removed under the i.i.d. sampling scheme. Note that these convergence results are valid for  
 80 all the above mentioned choices for  $K_c$ .
- 81 • To preserve the privacy of local actions, we propose a variant of our algorithm which utilizes  
 82 noisy local rewards for estimating global rewards. We show that such an algorithm will  
 83 maintain the optimal sample complexity at the expense of communicating at each iteration.

84 The underlying principle for obtaining the above convergence results is that we reveal *the hidden*  
 85 *smoothness of the optimal critic variable*, so that we can derive an approximate descent on the  
 86 averaged critic’s optimal gap at each iteration. Consequently, we can resort to the classic convergence  
 87 analysis for alternating optimization algorithms to establish the approximate ascent property of the  
 88 overall optimization process, which leads to the final sample complexity results.

---

<sup>1</sup>As convention [9], when we use "single-timescale", it means we utilize a single-loop algorithmic framework  
 with single-timescale step sizes rule.

89 Another technical highlight is the Lyapunov function we construct for measuring the progress of our  
 90 algorithm. Such a construction is motivated by [4], which analyzes bi-level optimization algorithm.  
 91 However, our Lyapunov function is different from theirs as it involves the additional optimal gap of  
 92 averaged critic and reward estimator, which is necessary for dealing with the decentralized setting.

93 We finish this section by remarking that our convergence results are even new for single agent AC  
 94 algorithms under the setting of single-timescale step sizes rule.

## 95 2 Preliminary

96 In this section, we introduce the problem formulation and the policy gradient theorem, which serves  
 97 as the preliminary for the analyzed decentralized AC algorithm.

98 Suppose there are multiple agents aiming to independently optimize a common global objective, and  
 99 each agent can communicate with its neighbors through a network. To model the topology, we define  
 100 the graph as  $\mathcal{G} = (\mathcal{N}, \mathcal{E})$ , where  $\mathcal{N}$  is the set of nodes with  $|\mathcal{N}| = N$  and  $\mathcal{E}$  is the set of edges with  
 101  $|\mathcal{E}| = E$ . In the graph, each node represents an agent, and each edge represents a communication  
 102 link. The interaction between agents follows the networked multi-agent MDP.

### 103 2.1 Markov decision process

104 A networked multi-agent MDP is defined by a tuple  $(\mathcal{G}, \mathcal{S}, \{\mathcal{A}^i\}_{i \in \mathcal{N}}, \mathcal{P}, \{r^i\}_{i \in [N]}, \gamma)$ .  $\mathcal{G}$  denotes the  
 105 communication topology (the graph),  $\mathcal{S}$  is the finite state space observed by all agents,  $\mathcal{A}^i$  represents  
 106 the finite action space of agent  $i$ . Let  $\mathcal{A} := \mathcal{A}^1 \times \dots \times \mathcal{A}^N$  denote the joint action space and  
 107  $\mathcal{P}(s'|s, a) : \mathcal{S} \times \mathcal{A} \times \mathcal{S} \rightarrow [0, 1]$  denote the transition probability from any state  $s \in \mathcal{S}$  to any state  
 108  $s' \in \mathcal{S}$  for any joint action  $a \in \mathcal{A}$ .  $r^i : \mathcal{S} \times \mathcal{A} \rightarrow \mathbb{R}$  is the local reward function that determines the  
 109 reward received by agent  $i$  given transition  $(s, a)$ ;  $\gamma \in [0, 1]$  is the discount factor.

110 For simplicity, we will use  $a := [a^1, \dots, a^N]$  to denote the joint action, and  $\theta := [\theta^1, \dots, \theta^N] \in$   
 111  $\mathbb{R}^{d_\theta \times N}$  to denote joint parameters of all actors, with  $\theta^i \in \mathbb{R}^{d_\theta}$ . Note that different actors may have  
 112 different number of parameters, which is assumed to be the same for our paper without loss of  
 113 generality. The MDP goes as follows: For a given state  $s$ , each agent make its decision  $a^i$  based  
 114 on its policy  $a^i \sim \pi_{\theta^i}(\cdot|s)$ . The state transits to the next state  $s'$  based on the joint action of all the  
 115 agents:  $s' \sim \mathcal{P}(\cdot|s, a)$ . Then, each agent will receive its own reward  $r^i(s, a)$ . For the notation brevity,  
 116 we assume that the reward function mapping is deterministic and does not depend on the next state  
 117 without loss of generality. The stationary distribution induced by the policy  $\pi_\theta$  and the transition  
 118 kernel is denoted by  $\mu_{\pi_\theta}(s)$ .

119 Our objective is to find a set of policies that maximize the accumulated discounted mean reward  
 120 received by agents

$$\theta^* = \arg \max_{\theta} J(\theta) := \mathbb{E} \left[ \sum_{k=0}^{\infty} \gamma^k \bar{r}(s_k, a_k) \right]. \quad (1)$$

121 Here,  $k$  represents the time step.  $\bar{r}(s_k, a_k) := \frac{1}{N} \sum_{i=1}^N r^i(s_k, a_k)$  is the mean reward among agents  
 122 at time step  $k$ . The randomness of the expectation comes from the initial state distribution  $\mu_0(s)$ , the  
 123 transition kernel  $\mathcal{P}$ , and the stochastic policy  $\pi_{\theta^i}(\cdot|s)$ .

### 124 2.2 Policy gradient Theorem

125 Under the discounted reward setting, the global state-value function, action-value function, and  
 126 advantage function for policy set  $\theta$ , state  $s$ , and action  $a$ , are defined as

$$\begin{aligned} V_{\pi_\theta}(s) &:= \mathbb{E} \left[ \sum_{k=0}^{\infty} \gamma^k \bar{r}(s_k, a_k) | s_0 = s \right] \\ Q_{\pi_\theta}(s, a) &:= \mathbb{E} \left[ \sum_{k=0}^{\infty} \gamma^k \bar{r}(s_k, a_k) | s_0 = s, a_0 = a \right] \\ A_{\pi_\theta}(s, a) &:= Q_{\pi_\theta}(s, a) - V_{\pi_\theta}(s). \end{aligned} \quad (2)$$

127 To maximize the objective function defined in (1), the policy gradient [28] can be computed as follow

$$\nabla_{\theta} J(\theta) = \mathbb{E}_{s \sim d_{\pi_{\theta}}, a \sim \pi_{\theta}} \left[ \frac{1}{1 - \gamma} A_{\pi_{\theta}}(s, a) \psi_{\pi_{\theta}}(s, a) \right],$$

128 where  $d_{\pi_{\theta}}(s) := (1 - \gamma) \sum_{k=0}^{\infty} \gamma^k \mathbb{P}(s_k = s)$  is the discounted state visitation distribution under  
129 policy  $\pi_{\theta}$ , and  $\psi_{\pi_{\theta}}(s, a) := \nabla \log \pi_{\theta}(s, a)$  is the score function.

130 Following the derivation of [42], the policy gradient for each agent under discounted reward setting  
131 can be expressed as

$$\nabla_{\theta^i} J(\theta) = \mathbb{E}_{s \sim d_{\pi_{\theta}}, a \sim \pi_{\theta}} \left[ \frac{1}{1 - \gamma} A_{\pi_{\theta}}(s, a) \psi_{\pi_{\theta^i}}(s, a^i) \right]. \quad (3)$$

### 132 3 Decentralized single-timescale actor-critic

---

#### Algorithm 1: Decentralized single-timescale AC (reward estimator version)

---

1: **Initialize:** Actor parameter  $\theta_0$ , critic parameter  $\omega_0$ , reward estimator parameter  $\lambda_0$ , initial state  $s_0$ .  
2: **for**  $k = 0, \dots, K - 1$  **do**  
3:   **Option 1: i.i.d. sampling:**  
4:    $s_k \sim \mu_{\theta_k}(\cdot), a_k \sim \pi_{\theta_k}(\cdot | s_k), s_{k+1} \sim \mathcal{P}(\cdot | s_k, a_k)$ .  
5:   **Option 2: Markovian sampling:**  
6:    $a_k \sim \pi_{\theta_k}(\cdot | s_k), s_{k+1} \sim \mathcal{P}(\cdot | s_k, a_k)$ .  
7:  
8:   **Periodical consensus:** Compute  $\tilde{\omega}_k^i$  and  $\tilde{\lambda}_k^i$  by (4) and (7).  
9:  
10:   **for**  $i = 0, \dots, N$  **in parallel do**  
11:     **Reward estimator update:** Update  $\lambda_{k+1}^i$  by (8).  
12:     **Critic update:** Update  $\omega_{k+1}^i$  by (5).  
13:     **Actor update:** Update  $\theta_{k+1}^i$  by (6).  
14:   **end for**  
15: **end for**

---

133 We introduce the decentralized single-timescale AC algorithm; see Algorithm 1. In the remaining  
134 parts of this section, we will explain the updates in the algorithm in details.

135 In fully-decentralized MARL, each agent can only observe its local reward and action, while trying  
136 to maximize the global reward (mean reward) defined in (1). The decentralized AC algorithm solves  
137 the problem by performing online updates in an alternative fashion. Specifically, we have  $N$  pairs of  
138 actor and critic. In order to maximize  $J(\theta)$ , each critic tries to estimate the *global* state-value function  
139  $V_{\pi_{\theta}}(s)$  defined in (2), and each actor then updates its policy parameter based on approximated policy  
140 gradient. We now provide more details about the algorithm.

141 **Critics' update.** We will use  $\omega^i \in \mathbb{R}^{d_{\omega}}$  to denote the  $i_{th}$  critic's parameter and  $\bar{\omega} := \frac{1}{N} \sum_{i=1}^N \omega^i$  to  
142 represent the averaged parameter of critic. The  $i_{th}$  critic approximates the global value function as  
143  $V_{\pi_{\theta}}(s) \approx \hat{V}_{\omega^i}(s)$ .

144 As we will see, the critic's approximation error can be categorized into two parts, namely, the  
145 consensus error  $\frac{1}{N} \sum_{i=1}^N \|\omega^i - \bar{\omega}\|$ , which measures how close the critics' parameters are; and the  
146 approximation error  $\|\bar{\omega} - \omega^*(\theta)\|$ , which measures the approximation quality of averaged critic.

147 In order for critics to reach consensus, we perform the following update for all critics

$$\tilde{\omega}_k^i = \begin{cases} \sum_{j=1}^N W^{ij} \omega_k^j & \text{if } k \bmod K_c = 0 \\ \omega_k^i & \text{otherwise.} \end{cases} \quad (4)$$

148 where  $W \in \mathbb{R}^{n \times n}$  is a weight matrix for communication among agents, whose property will be  
149 specified in Assumption 5;  $K_c$  denotes the consensus frequency.

150 To reduce the approximation error, we will perform the local TD(0) update [29] as

$$\omega_{k+1}^i = \Pi_{R_{\omega}}(\tilde{\omega}_k^i + \beta_k g_c^i(\xi_k, \omega_k^i)), \quad (5)$$

151 where  $\xi := (s, a, s')$  represents a transition tuple,  $g_c^i(\xi, \omega) := \delta^i(\xi, \omega) \nabla \hat{V}_\omega(s)$  is the update direction,  
 152  $\delta^i(\xi, \omega) := r^i(s, a) + \gamma \hat{V}_\omega(s') - \hat{V}_\omega(s)$  is the local temporal difference error (TD-error).  $\beta_k$  is the  
 153 step size for critic at iteration  $k$ .  $\Pi_{R_\omega}$  projects the parameter into a ball of radius of  $R_\omega$  containing  
 154 the optimal solution, which will be explained when discussing Assumption 1 and 2.

155 **Actors' update.** We will use stochastic gradient ascent to update the policy's parameter, and the  
 156 stochastic gradient is calculated based on policy gradient theorem in (3). The advantage function  
 157  $A_{\pi_\theta}(s, a)$  can be estimated by

$$\delta(\xi, \theta) := \bar{r}(s, a) + \gamma V(s') - V(s),$$

158 with  $a$  sampled from  $\pi_\theta(\cdot|s)$ . However, to preserve the privacy of each agents, the local reward  
 159 cannot be shared to other agents under the fully decentralized setting. Thus, the averaged reward  
 160  $\bar{r}(s_k, a_k)$  is not directly attainable. Consequently, we need a strategy to approximate the averaged  
 161 reward. In this paper, we will adopt the strategy proposed in [42]. In particular, each agent  $i$  will have  
 162 a local reward estimator with parameter  $\lambda^i \in \mathbb{R}^{d_\lambda}$ , which estimates the global averaged reward as  
 163  $\bar{r}(s_k, a_k) \approx \hat{r}_{\lambda^i}(s_k, a_k)$ .

164 Thus, the update of the  $i_{th}$  actor is given by

$$\theta_{k+1}^i = \theta_k^i + \alpha_k \hat{\delta}(\xi_k, \omega_{k+1}^i, \lambda_{k+1}^i) \psi_{\pi_{\theta_k^i}}(s_k, a_k^i), \quad (6)$$

165 where  $\hat{\delta}(\xi, \omega, \lambda) := \hat{r}_\lambda(s, a) + \gamma \hat{V}_\omega(s') - \hat{V}_\omega(s)$  is the approximated advantage function.  $\alpha_k$  is the  
 166 step size for actor's update at iteration  $k$ .

167 **Reward estimators' update.** Similar to critic, each reward estimator's approximation error can be  
 168 decomposed into consensus error and the approximation error.

169 For each local reward estimator, we perform the consensus step to minimize the consensus error as

$$\tilde{\lambda}_k^i = \begin{cases} \sum_{j=1}^N W^{ij} \lambda_k^j & \text{if } k \bmod K_c = 0 \\ \lambda_k^i & \text{otherwise.} \end{cases} \quad (7)$$

170 To reduce the approximation error, we perform a local update of stochastic gradient descent.

$$\lambda_{k+1}^i = \Pi_{R_\lambda}(\tilde{\lambda}_k^i + \eta_k g_r^i(\xi_k, \lambda_k^i)), \quad (8)$$

171 where  $g_r^i(\xi, \lambda) := (r^i(s, a) - \hat{r}_\lambda(s, a)) \nabla \hat{r}_\lambda(s, a)$  is the update direction.  $\eta_k$  is the step size for  
 172 reward estimator at iteration  $k$ . Note the calculation of  $g_r^i(\xi, \lambda)$  does not require the knowledge of  $s'$ ;  
 173 we use  $\xi$  in (8) just for notation brevity. Similar to critic's update,  $\Pi_{R_\lambda}$  projects the parameter into a  
 174 ball of radius of  $R_\lambda$  containing the optimal solution.

175 In our Algorithm 1, we will use the same order for  $\alpha_k$ ,  $\beta_k$ , and  $\eta_k$  and hence, our algorithm is in  
 176 *single-timescale*.

177 **Linear approximation for analysis.** In our analysis, we will use linear approximation for both critic  
 178 and reward estimator variables, i.e.  $\hat{V}_\omega(s) := \phi(s)^T \omega$ ;  $\hat{r}_\lambda(s, a) := \varphi(s, a)^T \lambda$ , where  $\phi(s) : \mathcal{S} \rightarrow$   
 179  $\mathbb{R}^{d_\omega}$  and  $\varphi(s, a) : \mathcal{S} \times \mathcal{A} \rightarrow \mathbb{R}^{d_\lambda}$  are two feature mappings, whose property will be specified in the  
 180 discussion of Assumption 1.

181 **Algorithm for preserving the local action.** Note that in Algorithm 1, the reward estimators need  
 182 the knowledge of joint actions in order to estimate the global rewards. To preserve the privacy of  
 183 local actions, we further propose a variant of Algorithm 1, which estimates the global rewards by  
 184 communicating noisy local rewards; see [6] for the original idea. However, to maintain the optimal  
 185 sample complexity, such an approach requires  $\mathcal{O}(\log(\varepsilon^{-1}))$  communication rounds for each iteration.  
 186 We postpone the detailed design and analysis of such an algorithm scheme into Appendix B.

187 **Remarks on sampling scheme.** The unbiased update for critic and actor variables requires sampling  
 188 from  $\mu_{\pi_\theta}$  and  $d_{\pi_\theta}$ , respectively. However, in practical implementations, states are usually collected  
 189 from an online trajectory (Markovian sampling), whose distribution is generally different for  $\mu_{\pi_\theta}$   
 190 and  $d_{\pi_\theta}$ . Such a distribution mismatch will inevitably cause biases during the update of critic and  
 191 actor variables. One has to bound the corresponding error terms when analyzing the algorithm. In  
 192 this work, we will provide the analysis for both sampling schemes.

193 **4 Main Results**

194 In this section, we first introduce the technical assumptions used for our analysis, which are standard  
 195 in the literature. Then, we present the convergence results for both actor and critic variables under  
 196 i.i.d. sampling and Markovian sampling.

197 **4.1 Assumptions**

198 **Assumption 1** (bounded rewards and feature vectors). *All the local rewards are uniformly bounded,*  
 199 *i.e., there exists a positive constants  $r_{\max}$  such that  $|r^i(s, a)| \leq r_{\max}$ , for all feasible  $(s, a)$  and*  
 200  *$i \in [N]$ . The norm of feature vectors are bounded such that for all  $s \in \mathcal{S}$ ,  $a \in \mathcal{A}$ ,  $\|\phi(s)\| \leq$*   
 201  *$1$ ,  $\|\varphi(s, a)\| \leq 1$ .*

202 Assumption 1 is standard and commonly adopted; see, e.g., [3, 35, 38, 24, 21]. This assumption can  
 203 be achieved via normalizing the feature vectors.

204 **Assumption 2** (negative definiteness of  $A_{\theta, \phi}$  and  $A_{\theta, \varphi}$ ). *There exists two positive constants  $\lambda_{\phi}, \lambda_{\varphi}$*   
 205 *such that for all policy  $\theta$ , the following two matrices are negative definite*

$$A_{\theta, \phi} := \mathbb{E}_{s \sim \mu_{\theta}(s)} [\phi(s)(\gamma \phi(s')^T - \phi(s)^T)]$$

$$A_{\theta, \varphi} := \mathbb{E}_{s \sim \mu_{\theta}(s), a \sim \pi_{\theta}(\cdot|s)} [-\varphi(s, a)\varphi(s, a)^T],$$

206 *with  $\lambda_{\max}(A_{\theta, \phi}) \leq \lambda_{\phi}$ ,  $\lambda_{\max}(A_{\theta, \varphi}) \leq \lambda_{\varphi}$ , where  $\lambda_{\max}(\cdot)$  represents the largest eigenvalue.*

207 Assumption 2 can be achieved when the matrices  $\Phi_{\phi} := [\phi(s_1), \dots, \phi(s_{|\mathcal{S}|})]$  and  $\Phi_{\varphi} :=$   
 208  $[\varphi(s_1, a_1), \dots, \varphi(s_{|\mathcal{S}|}, a_{|\mathcal{A}|})]$  have full row rank, which ensures that the optimal critic and reward  
 209 estimator are unique; see also [24, 34]. Together with Assumption 1, we can show that the norm of  
 210  $\omega^*(\theta)$  and  $\lambda^*(\theta)$  are bounded by some positive constant, which justifies the projection steps.

211 **Assumption 3** (Lipschitz properties of policy). *There exists constants  $C_{\psi}, L_{\psi}, L_{\pi}$  such that for*  
 212 *all  $\theta, \theta', s \in \mathcal{S}$  and  $a \in \mathcal{A}$ , we have (1).  $|\pi_{\theta}(a|s) - \pi_{\theta'}(a|s)| \leq L_{\pi}\|\theta - \theta'\|$ ; (2).  $\|\psi_{\theta}(s, a) -$*   
 213  *$\psi_{\theta'}(s, a)\| \leq L_{\psi}\|\theta - \theta'\|$ ; (3).  $\|\psi_{\theta}(s, a)\| \leq C_{\psi}$ .*

214 Assumption 3 is common for analyzing policy-based algorithms; see, e.g., [33, 32, 11]. The assumption  
 215 ensures the smoothness of objective function  $J(\theta)$ . It holds for a large range of policy classes  
 216 such as tabular softmax policy [1], Gaussian policy [7], and Boltzman policy [13].

217 **Assumption 4** (irreducible and aperiodic Markov chain). *The Markov chain under  $\pi_{\theta}$  and transition*  
 218 *kernel  $\mathcal{P}(\cdot|s, a)$  is irreducible and aperiodic for any  $\theta$ .*

219 Assumption 4 is a standard assumption, which holds for any uniformly ergodic Markov chains and  
 220 any time-homogeneous Markov chains with finite-state space. It ensures that there exists constants  
 221  $\kappa > 0$  and  $\rho \in (0, 1)$  such that

$$\sup_{s \in \mathcal{S}} d_{TV}(\mathbb{P}(s_k \in \cdot | s_0 = s, \pi_{\theta}), \mu_{\theta}) \leq \kappa \rho^k, \forall k.$$

222 **Assumption 5** (doubly stochastic weight matrix). *The communication matrix  $W$  is doubly stochastic,*  
 223 *i.e. each column/row sum up to 1. Moreover, the second largest singular value  $\nu$  is smaller than 1.*

224 Assumption 5 is a common assumption in decentralized optimization and multi-agent reinforcement  
 225 learning; see, e.g., [27, 5, 6]. It ensures the convergence of consensus error for critic and reward  
 226 estimator variables.

227 **4.2 Sample complexity under i.i.d. sampling**

228 **Theorem 1** (sample complexity under i.i.d. sampling). *Suppose Assumptions 1-5 hold. Consider*  
 229 *the update of Algorithm 1 under i.i.d. sampling. Let  $\alpha_k = \frac{\bar{\alpha}}{\sqrt{K}}$  for some positive constant  $\bar{\alpha}$ ,*  
 230  *$\beta_k = \frac{C_9}{2\lambda_{\phi}}\alpha_k$ , and  $\eta_k = \frac{C_{10}}{2\lambda_{\varphi}}\alpha_k$ ,  $K_c \leq \mathcal{O}(K^{1/4})$ , where  $K$  denotes the total number of iterations.*  
 231 *Then, we have*

$$\frac{1}{K} \sum_{k=1}^K \sum_{i=1}^N \mathbb{E} [\|\omega_k^i - \omega^*(\theta_k)\|^2] \leq \mathcal{O}\left(\frac{1}{\sqrt{K}}\right)$$

$$\frac{1}{K} \sum_{k=1}^K \sum_{i=1}^N \mathbb{E} [\|\nabla_{\theta^i} F(\theta_k)\|^2] \leq \mathcal{O}\left(\frac{1}{\sqrt{K}}\right) + \mathcal{O}(\varepsilon_{app} + \varepsilon_{sp}), \quad (9)$$



232 where  $C_9, C_{10}$  are positive constants defined in the proof.

233 The proof of Theorem 1 can be found in Appendix E.1. It establishes the iteration complexity of  
 234  $\mathcal{O}(1/\sqrt{K})$ , or equivalently, sample complexity of  $\mathcal{O}(\varepsilon^{-2})$  for Algorithm 1. Note that actors, critics,  
 235 and reward estimators use the step sizes of the same order. The sample complexity matches the  
 236 optimal rate of SGD for general non-convex optimization problem. To explain the errors in (9), let us  
 237 define the approximation error as the following:

$$\varepsilon_{app} := \max_{\theta, a} \sqrt{\mathbb{E}_{s \sim \mu_\theta} \left[ |V_{\pi_\theta}(s) - \hat{V}_{\omega^*(\theta)}(s)|^2 + |\bar{r}(s, a) - \hat{r}_{\lambda^*(\theta)}(s, a)|^2 \right]}.$$

238 The error  $\varepsilon_{app}$  captures the approximation power of critic and reward estimator. Similar terms  
 239 also appear in the literature (see e.g., [35, 1, 21]). Such an approximation error becomes zero in  
 240 tabular case. The error  $\varepsilon_{sp}$  is inevitably caused by the mismatch between discounted state visitation  
 241 distribution  $d_{\pi_\theta}$  and stationary distribution  $\mu_{\pi_\theta}$ ; see, e.g., [38, 24]. It is defined as

$$\varepsilon_{sp} := 2C_\theta (\log_\rho \kappa^{-1} + \frac{1}{\rho})(1 - \gamma).$$

242 When  $\gamma$  is close to 1, the error becomes small. This is because  $d_{\pi_\theta}$  approaches to  $\mu_{\pi_\theta}$  when  $\gamma$  goes to  
 243 1. In the literature, some works assume that sampling from  $d_{\pi_\theta}$  is permitted, thus eliminate this error;  
 244 see, e.g., [4].

### 245 4.3 Sample complexity under Markovian sampling

246 **Theorem 2** (sample complexity under Markovian sampling). *Suppose Assumptions 1-5 hold. Con-*  
 247 *sider the update of Algorithm 1 under Markovian sampling. Let  $\alpha_k = \frac{\bar{\alpha}}{\sqrt{K}}$  for some positive constant*  
 248  *$\bar{\alpha}, \beta_k = \frac{C_9}{2\lambda_\phi} \alpha_k$ , and  $\eta_k = \frac{C_{10}}{2\lambda_\phi} \alpha_k$ ,  $K_c \leq \mathcal{O}(K^{1/4})$ , where  $K$  is the total number of iterations. Then,*  
 249 *we have*

$$\begin{aligned} \frac{1}{K} \sum_{k=1}^K \sum_{i=1}^N \mathbb{E} [\|\omega_k^i - \omega^*(\theta_k)\|^2] &\leq \mathcal{O}\left(\frac{\log^2 K}{\sqrt{K}}\right) \\ \frac{1}{K} \sum_{k=1}^K \sum_{i=1}^N \mathbb{E} [\|\nabla_{\theta^i} F(\theta_k)\|^2] &\leq \mathcal{O}\left(\frac{\log^2 K}{\sqrt{K}}\right) + \mathcal{O}(\varepsilon_{app} + \varepsilon_{sp}), \end{aligned} \quad (10)$$

250 where  $C_9, C_{10}$  are positive constants defined in proof.

251 We put the proof of Theorem 2 in Appendix E.2. In Markovian sampling, the updates are biased for  
 252 critics, actors, and reward estimators. The error will decrease as the Markov chain mixes, and the  
 253 logarithmic term is due to the cost for mixing.

254 Theorem 2 establishes the iteration complexity of  $\mathcal{O}(\log^2 K/\sqrt{K})$ , or equivalently, sample complex-  
 255 ity of  $\tilde{\mathcal{O}}(\varepsilon^{-2})$  for Algorithm 1. It matches the state-of-the-art sample complexity of decentralized AC  
 256 algorithms, which are implemented in double-loop fashion [11, 6].

### 257 4.4 Proof sketch

258 We present the main elements for the proof of Theorem 2, which helps in understanding the difference  
 259 between classical two-timescale/double-loop analysis and our single-timescale analysis. The proof of  
 260 Theorem 1 follows the same framework with simpler sampling scheme.

261 Under Markovian sampling, it is possible to show the following inequality, which characterizes the  
 262 ascent of the objective.

$$\begin{aligned} \mathbb{E}[J(\theta_{k+1})] - J(\theta_k) &\geq \sum_{i=1}^N \left[ \frac{\alpha_k}{2} \mathbb{E} \|\nabla_{\theta^i} J(\theta_k)\|^2 + \frac{\alpha_k}{2} \mathbb{E} \|g_a^i(\xi_k, \omega_{k+1}^i, \lambda_{k+1}^i)\|^2 \right. \\ &\quad \left. - 8C_\psi^2 \alpha_k \mathbb{E} \|\omega^*(\theta_k) - \omega_{k+1}^i\|^2 - 4C_\psi^2 \alpha_k \mathbb{E} \|\lambda^*(\theta_k) - \lambda_{k+1}^i\|^2 \right] \\ &\quad - \mathcal{O}(\log^2(K) \alpha_k^2) - \mathcal{O}((\varepsilon_{app} + \varepsilon_{sp}) \alpha_k). \end{aligned} \quad (11)$$

263 To analyze the errors of critic  $\|\omega^*(\theta_k) - \omega_{k+1}^i\|^2$  and reward estimator  $\|\lambda^*(\theta_k) - \lambda_{k+1}^i\|^2$ , the two-  
264 timescale analysis requires  $\mathcal{O}(\alpha_k) < \min\{\mathcal{O}(\beta_k), \mathcal{O}(\eta_k)\}$  in order for these two errors to converge.  
265 **The double-loop approach runs lower-level update for  $\mathcal{O}(\log(\varepsilon^{-1}))$  times with batch size  $\mathcal{O}(\varepsilon^{-1})$**   
266 **to drive these errors below  $\varepsilon$  and hence, they cannot allow inner loop size and bath size to be  $\mathcal{O}(1)$**   
267 **simultaneously.** To obtain the convergence result for *single-timescale* update, the idea is to further  
268 upper bound these two lower-level errors by the quantity  $\mathcal{O}(\alpha_k \mathbb{E}\|g_a^i(\xi_k, \omega_{k+1}^i, \lambda_{k+1}^i)\|^2)$  (through a  
269 series of derivations), and then eliminate these errors by the ascent term  $\frac{\alpha_k}{2} \mathbb{E}\|g_a^i(\xi_k, \omega_{k+1}^i, \lambda_{k+1}^i)\|^2$ .  
270 We mainly focus on the analysis of critic's error through the proof sketch. The analysis for reward  
271 estimator's error follows similar procedure. We start by decomposing the error of critic as

$$\sum_{i=1}^N \|\omega_{k+1}^i - \omega^*(\theta_k)\|^2 = \sum_{i=1}^N (\|\omega_{k+1}^i - \bar{\omega}_{k+1}\|^2 + \|\bar{\omega}_{k+1} - \omega^*(\theta_k)\|^2). \quad (12)$$

272 The first term represents the consensus error, which can be bounded by the next lemma.

273 **Lemma 1.** *Suppose Assumptions 1 and 5 hold. Consider the sequence  $\{\omega_k^i\}$  generated by Algorithm 1,*  
274 *then the following holds*

$$\|Q\omega_{k+1}\| \leq \nu^{\frac{k'}{K_c}} \|\omega_0\| + 4 \sum_{t=0}^k \nu^{\lceil \frac{k'-1-t}{K_c} \rceil} \beta_t \sqrt{N} C_\delta,$$

275 where  $\omega_0 := [\omega^1, \dots, \omega^N]^T$ ,  $Q := I - \frac{1}{N} \mathbf{1}\mathbf{1}^T$ ,  $k' := \lfloor \frac{k}{K_c} \rfloor * K_c$ . The constant  $\nu \in (0, 1)$  is the  
276 second largest singular value of  $W$ .

277 Based on Lemma 1 and follow the step size rule of Theorem 2, it is possible to show  $\|Q\omega_{k+1}\|_F^2 =$   
278  $\sum_{i=1}^N \|\omega_{k+1}^i - \bar{\omega}_{k+1}\|^2 = \mathcal{O}(K_c^2 \beta_k^2)$ . Let  $K_c = \mathcal{O}(\beta_k^{-\frac{1}{2}})$ , we have  $\|Q\omega_{k+1}\|_F^2 = \mathcal{O}(\beta_k)$ , which  
279 maintains the optimal rate.

280 To analyze the second term in (12), we first construct the following Lyapunov function

$$\mathbb{V}_k := -J(\theta_k) + \|\bar{\omega}_k - \omega^*(\theta_k)\|^2 + \|\bar{\lambda}_k - \lambda^*(\theta_k)\|^2. \quad (13)$$

281 Then, it remains to derive an approximate descent property of the term  $\|\bar{\omega}_k - \omega^*(\theta_k)\|^2$  in (13).  
282 Towards that end, our key step lies in establishing the *smoothness of the optimal critic variables*  
283 shown in the next lemma.

284 **Lemma 2** (smoothness of optimal critic). *Suppose Assumptions 1-3 hold, under the update of*  
285 *Algorithm 1, there exists a positive constant  $L_{\mu,1}$  such that for all  $\theta, \theta'$ , it holds that*

$$\|\nabla \omega^*(\theta) - \nabla \omega^*(\theta')\| \leq L_{\mu,1} \|\theta - \theta'\|,$$

286 where  $\nabla \omega^*(\theta)$  denotes the Jacobian of  $\omega^*(\theta)$  with respect to  $\theta$ .

287 This smoothness property is essential for achieving our  $\tilde{\mathcal{O}}(1/\sqrt{K})$  convergence rate.

288 To the best of our knowledge, the smoothness of  $\omega^*(\theta)$  has not been justified in the literature.  
289 Equipped with Lemma 2, we are able to establish the following lemma.

290 **Lemma 3** (Error of critic). *Under Assumptions 1-5, consider the update of Algorithm 1. Then, it*  
291 *holds that*

$$\begin{aligned} \mathbb{E}[\|\bar{\omega}_{k+1} - \omega^*(\theta_{k+1})\|^2] &\leq (1 + C_9 \alpha_k) \|\bar{\omega}_{k+1} - \omega^*(\theta_k)\|^2 \\ &\quad + \frac{\alpha_k}{4} \sum_{i=1}^N \|\mathbb{E}[g_a^i(\xi_k, \omega_{k+1}^i, \lambda_{k+1}^i)]\|^2 + \mathcal{O}(\alpha_k^2). \end{aligned} \quad (14)$$

$$\begin{aligned} \mathbb{E}[\|\bar{\omega}_{k+1} - \omega^*(\theta_k)\|^2] &\leq (1 - 2\lambda_\phi \beta_k) \|\bar{\omega}_k - \omega^*(\theta_k)\|^2 \\ &\quad + C_{K_1} \beta_k \beta_{k-Z_K} + C_{K_2} \alpha_{k-Z_K} \beta_k. \end{aligned} \quad (15)$$

292 Here,  $Z_K := \min\{z \in \mathbb{N}^+ | \kappa \rho^{z-1} \leq \min\{\alpha_k, \beta_k, \eta_k\}\}$ ,  $C_9, \lambda_\phi$  are constants specified in appendix,  
293 and  $C_{K_1}$  and  $C_{K_2}$  are of order  $\mathcal{O}(\log(K))$  and  $\mathcal{O}(\log^2(K))d$  respectively.



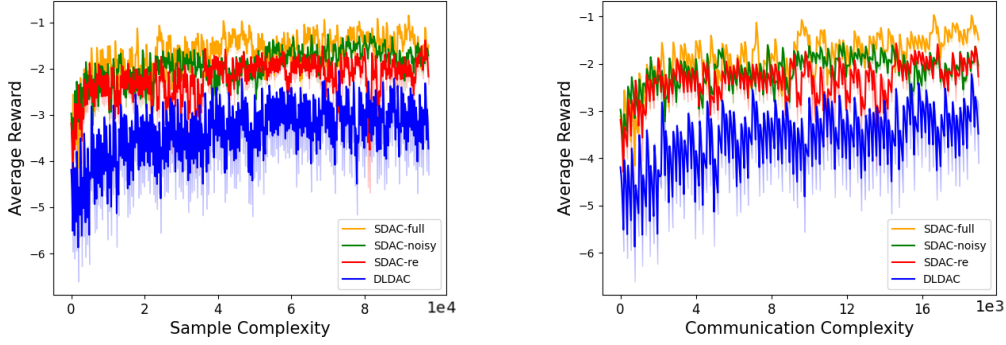

Figure 1: Averaged reward versus sample complexity and communication complexity. The vertical axis is the averaged reward over all the agents.

294 Plug (15) into (14), we can establish the approximate descent property of  $\|\bar{\omega}_k - \omega^*(\theta_k)\|^2$  in (13):

$$\begin{aligned}
 \mathbb{E}[\|\bar{\omega}_{k+1} - \omega^*(\theta_{k+1})\|^2] &\leq (1 + C_9\alpha_k)(1 - 2\lambda_\phi\beta_k)\|\bar{\omega}_k - \omega^*(\theta_k)\|^2 \\
 &\quad + \frac{\alpha_k}{4} \sum_{i=1}^N \|\mathbb{E}[g_a^i(\xi_k, \omega_{k+1}^i, \lambda_{k+1}^i)]\|^2 \\
 &\quad + \mathcal{O}(C_{K_1}\beta_k\beta_{k-Z_K} + C_{K_2}\alpha_{k-Z_K}\beta_k). \tag{16}
 \end{aligned}$$

295 Finally, plugging (11), (14), and (16) into (13) gives the ascent of the Lyapunov function, which leads  
 296 to our convergence result through steps of standard arguments.

## 297 5 Numerical results

298 In this section, our objective is to illustrate the empirical sample complexity and communication  
 299 complexity of the proposed algorithms. We also implement the algorithm in [6] to serve as a baseline,  
 300 which employs double-loop algorithmic framework. Our simulation is based on the grounded  
 301 communication environment proposed in [19]; see Appendix A for detailed set up. Through the  
 302 discussion, we refer the algorithm in [6] as "DLDAC", the Algorithm 1 as "SDAC-re", the Algorithm 2  
 303 as "SDAC-noisy" (see Appendix B). We also provide the result which assumes full reward is available  
 304 to serve as baseline, which we refer as "SDAC-full". We set  $K_r = 5$  for "SDAC-noisy";  $K_c = 1$   
 305 for "SDAC-re", "SDAC-noisy", and "SDAC-full". We choose  $T_c = 5$  (loop size),  $T'_c = 1$  (critic  
 306 consensus number every iteration),  $T' = 5$  (reward consensus number every iteration) for "DLDAC".

307 The sample complexity and communication complexity are shown in Figure 1. The results are  
 308 averaged over 10 Monte Carlo runs. As we can see, the proposed two algorithms achieve significantly  
 309 higher reward than "DLDAC" in terms of both sample complexity and communication complexity.  
 310 Moreover, their performances approach the baseline "SDAC-full", where the global reward is assumed  
 311 to be available, indicating that the reward approximation is nearly accurate. Due to space limit, we  
 312 will put additional experiments on the comparison with existing decentralized AC algorithms and the  
 313 ablation study of hyper-parameters to Appendix A.

## 314 6 Conclusion and future direction

315 In this paper, we studied the convergence of fully decentralized AC algorithm under practical single-  
 316 timescale update for the first time. We designed such an algorithm which maintains the optimal  
 317 sample complexity of  $\tilde{\mathcal{O}}(\varepsilon^{-2})$  under less communications. We also proposed a variant to preserve the  
 318 privacy of local actions by communicating noisy rewards. Extensive simulation results demonstrate  
 319 the superiority of our algorithms' empirical performance over existing decentralized AC algorithms.  
 320 One limitation of our work is that we only study the convergence to stationary point. Thus, we leave  
 321 the research on the avoidance of saddle points and convergence to global optimum as promising  
 322 future directions.

## References

- 323
- 324 [1] A. Agarwal, S. M. Kakade, J. D. Lee, and G. Mahajan. Optimality and approximation with  
325 policy gradient methods in markov decision processes. In *Conference on Learning Theory*  
326 (*COLT*), pages 64–66, 2020.
- 327 [2] J. Baxter and P. L. Bartlett. Infinite-horizon policy-gradient estimation. *Journal of Artificial*  
328 *Intelligence Research*, 15:319–350, 2001.
- 329 [3] J. Bhandari, D. Russo, and R. Singal. A finite time analysis of temporal difference learning with  
330 linear function approximation. In *Conference on Learning Theory (COLT)*, pages 1691–1692,  
331 2018.
- 332 [4] T. Chen, Y. Sun, and W. Yin. Closing the gap: Tighter analysis of alternating stochastic gradient  
333 methods for bilevel problems. In A. Beygelzimer, Y. Dauphin, P. Liang, and J. W. Vaughan,  
334 editors, *Advances in Neural Information Processing Systems*, 2021.
- 335 [5] Z. Chen, Y. Zhou, and R. Chen. Multi-agent off-policy td learning: Finite-time analysis with near-  
336 optimal sample complexity and communication complexity. *arXiv preprint arXiv:2103.13147*,  
337 2021.
- 338 [6] Z. Chen, Y. Zhou, R.-R. Chen, and S. Zou. Sample and communication-efficient decentralized  
339 actor-critic algorithms with finite-time analysis. In *International Conference on Machine*  
340 *Learning*, pages 3794–3834. PMLR, 2022.
- 341 [7] K. Doya. Reinforcement learning in continuous time and space. *Neural Computation*, 12(1):219–  
342 245, 2000.
- 343 [8] L. Espeholt, H. Soyer, R. Munos, K. Simonyan, V. Mnih, T. Ward, Y. Doron, V. Firoiu, T. Harley,  
344 I. Dunning, et al. Impala: Scalable distributed deep-rl with importance weighted actor-learner  
345 architectures. In *International Conference on Machine Learning*, pages 1407–1416. PMLR,  
346 2018.
- 347 [9] Z. Fu, Z. Yang, and Z. Wang. Single-timescale actor-critic provably finds globally optimal  
348 policy. In *International Conference on Learning Representations*, 2021.
- 349 [10] H. Guo, Z. Fu, Z. Yang, and Z. Wang. Decentralized single-timescale actor-critic on zero-  
350 sum two-player stochastic games. In *International Conference on Machine Learning*, pages  
351 3899–3909. PMLR, 2021.
- 352 [11] F. Hairi, J. Liu, and S. Lu. Finite-time convergence and sample complexity of multi-agent actor-  
353 critic reinforcement learning with average reward. In *International Conference on Learning*  
354 *Representations*, 2022.
- 355 [12] S. M. Kakade. A natural policy gradient. In *Proc. Advances in Neural Information Processing*  
356 *Systems (NIPS)*, pages 1531–1538, 2002.
- 357 [13] V. R. Konda and V. S. Borkar. Actor-critic-type learning algorithms for Markov decision  
358 processes. *SIAM Journal on Control and Optimization*, 38(1):94–123, 1999.
- 359 [14] T. P. Lillicrap, J. J. Hunt, A. Pritzel, N. Heess, T. Erez, Y. Tassa, D. Silver, and D. Wierstra.  
360 Continuous control with deep reinforcement learning. *arXiv preprint arXiv:1509.02971*, 2015.
- 361 [15] Y. Lin, K. Zhang, Z. Yang, Z. Wang, T. Başar, R. Sandhu, and J. Liu. A communication-efficient  
362 multi-agent actor-critic algorithm for distributed reinforcement learning. In *2019 IEEE 58th*  
363 *Conference on Decision and Control (CDC)*, pages 5562–5567, 2019.
- 364 [16] M. L. Littman. Markov games as a framework for multi-agent reinforcement learning. In  
365 *Machine learning proceedings 1994*, pages 157–163. Elsevier, 1994.
- 366 [17] Y. Liu, K. Zhang, T. Basar, and W. Yin. An improved analysis of (variance-reduced) policy  
367 gradient and natural policy gradient methods. *Advances in Neural Information Processing*  
368 *Systems*, 33:7624–7636, 2020.

- 369 [18] R. Lowe, Y. I. Wu, A. Tamar, J. Harb, O. Pieter Abbeel, and I. Mordatch. Multi-agent actor-critic  
370 for mixed cooperative-competitive environments. *Advances in neural information processing*  
371 *systems*, 30, 2017.
- 372 [19] I. Mordatch and P. Abbeel. Emergence of grounded compositional language in multi-agent  
373 populations. In *Proceedings of the AAAI Conference on Artificial Intelligence*, volume 32, 2018.
- 374 [20] S. Omidshafiei, J. Papis, C. Amato, J. P. How, and J. Vian. Deep decentralized multi-task  
375 multi-agent reinforcement learning under partial observability. In *International Conference on*  
376 *Machine Learning*, pages 2681–2690. PMLR, 2017.
- 377 [21] S. Qiu, Z. Yang, J. Ye, and Z. Wang. On the finite-time convergence of actor-critic algorithm.  
378 In *Optimization Foundations for Reinforcement Learning Workshop at Advances in Neural*  
379 *Information Processing Systems (NeurIPS)*, 2019.
- 380 [22] T. Rashid, M. Samvelyan, C. Schroeder, G. Farquhar, J. Foerster, and S. Whiteson. Qmix: Mono-  
381 tonic value function factorisation for deep multi-agent reinforcement learning. In *International*  
382 *Conference on Machine Learning*, pages 4295–4304. PMLR, 2018.
- 383 [23] J. Schulman, F. Wolski, P. Dhariwal, A. Radford, and O. Klimov. Proximal policy optimization  
384 algorithms. *arXiv preprint arXiv:1707.06347*, 2017.
- 385 [24] H. Shen, K. Zhang, M. Hong, and T. Chen. Asynchronous advantage actor critic: Non-  
386 asymptotic analysis and linear speedup. *ArXiv:2012.15511*, 2020.
- 387 [25] D. Silver, J. Schrittwieser, K. Simonyan, I. Antonoglou, A. Huang, A. Guez, T. Hubert, L. Baker,  
388 M. Lai, A. Bolton, et al. Mastering the game of go without human knowledge. *nature*,  
389 550(7676):354–359, 2017.
- 390 [26] K. Son, D. Kim, W. J. Kang, D. E. Hostallero, and Y. Yi. Qtran: Learning to factorize with  
391 transformation for cooperative multi-agent reinforcement learning. In *International Conference*  
392 *on Machine Learning*, pages 5887–5896. PMLR, 2019.
- 393 [27] J. Sun, G. Wang, G. B. Giannakis, Q. Yang, and Z. Yang. Finite-sample analysis of decentral-  
394 ized temporal-difference learning with linear function approximation. In *Proc. International*  
395 *Conference on Artificial Intelligence and Statistics (AISTATS)*, pages 4485–4495, 2020.
- 396 [28] R. S. Sutton, D. A. McAllester, S. P. Singh, and Y. Mansour. Policy gradient methods for  
397 reinforcement learning with function approximation. In *Proc. Advances in Neural Information*  
398 *Processing Systems (NIPS)*, pages 1057–1063, 2000.
- 399 [29] J. N. Tsitsiklis and B. Van Roy. Analysis of temporal-difference learning with function  
400 approximation. In *Advances in neural information processing systems (NIPS)*, pages 1075–  
401 1081, 1997.
- 402 [30] O. Vinyals, I. Babuschkin, W. M. Czarnecki, M. Mathieu, A. Dudzik, J. Chung, D. H. Choi,  
403 R. Powell, T. Ewalds, P. Georgiev, et al. Grandmaster level in starcraft ii using multi-agent  
404 reinforcement learning. *Nature*, 575(7782):350–354, 2019.
- 405 [31] Y. Wang, S. Zou, and Y. Zhou. Non-asymptotic analysis for two time-scale TDC with general  
406 smooth function approximation. In M. Ranzato, A. Beygelzimer, Y. Dauphin, P. Liang, and  
407 J. W. Vaughan, editors, *Advances in Neural Information Processing Systems*, volume 34, pages  
408 9747–9758. Curran Associates, Inc., 2021.
- 409 [32] Y. F. Wu, W. Zhang, P. Xu, and Q. Gu. A finite-time analysis of two time-scale actor-critic  
410 methods. *Advances in Neural Information Processing Systems*, 33:17617–17628, 2020.
- 411 [33] P. Xu, F. Gao, and Q. Gu. An improved convergence analysis of stochastic variance-reduced  
412 policy gradient. In *Proc. International Conference on Uncertainty in Artificial Intelligence*  
413 *(UAI)*, 2019.
- 414 [34] T. Xu and Y. Liang. Sample complexity bounds for two timescale value-based reinforcement  
415 learning algorithms. In *International Conference on Artificial Intelligence and Statistics*, pages  
416 811–819. PMLR, 2021.

- 417 [35] T. Xu, Z. Wang, and Y. Liang. Improving sample complexity bounds for (natural) actor-critic  
418 algorithms. In *Proc. Advances in Neural Information Processing Systems (NeurIPS)*, volume 33,  
419 2020.
- 420 [36] T. Xu, Z. Yang, Z. Wang, and Y. Liang. Doubly robust off-policy actor-critic: Convergence and  
421 optimality. *ArXiv:2102.11866*, 2021.
- 422 [37] C. Yu, X. Wang, X. Xu, M. Zhang, H. Ge, J. Ren, L. Sun, B. Chen, and G. Tan. Distributed  
423 multiagent coordinated learning for autonomous driving in highways based on dynamic co-  
424 ordination graphs. *IEEE Transactions on Intelligent Transportation Systems*, 21(2):735–748,  
425 2019.
- 426 [38] S. Zeng, T. Chen, A. Garcia, and M. Hong. Learning to coordinate in multi-agent systems: A  
427 coordinated actor-critic algorithm and finite-time guarantees. *arXiv preprint arXiv:2110.05597*,  
428 2021.
- 429 [39] H. Zhang, W. Chen, Z. Huang, M. Li, Y. Yang, W. Zhang, and J. Wang. Bi-level actor-critic  
430 for multi-agent coordination. In *Proceedings of the AAAI Conference on Artificial Intelligence*,  
431 volume 34, pages 7325–7332, 2020.
- 432 [40] K. Zhang, A. Koppel, H. Zhu, and T. Başar. Global convergence of policy gradient methods to  
433 (almost) locally optimal policies. *arXiv preprint arXiv:1906.08383*, 2019.
- 434 [41] K. Zhang, Z. Yang, and T. Başar. Multi-agent reinforcement learning: A selective overview of  
435 theories and algorithms. *Handbook of Reinforcement Learning and Control*, pages 321–384,  
436 2021.
- 437 [42] K. Zhang, Z. Yang, H. Liu, T. Zhang, and T. Basar. Fully decentralized multi-agent reinforcement  
438 learning with networked agents. In *International Conference on Machine Learning*, pages  
439 5872–5881. PMLR, 2018.

## 440 Checklist

- 441 1. For all authors...
- 442 (a) Do the main claims made in the abstract and introduction accurately reflect the paper’s  
443 contributions and scope? [Yes]
- 444 (b) Did you describe the limitations of your work? [Yes] The limitation is written in an  
445 equivalent form as future works in the conclusion section; see Section 6.
- 446 (c) Did you discuss any potential negative societal impacts of your work? [N/A] We  
447 conduct research about the design and analysis of the fundamental actor-critic algorithm,  
448 which should not bring any negative societal impact.
- 449 (d) Have you read the ethics review guidelines and ensured that your paper conforms to  
450 them? [Yes]
- 451 2. If you are including theoretical results...
- 452 (a) Did you state the full set of assumptions of all theoretical results? [Yes]
- 453 (b) Did you include complete proofs of all theoretical results? [Yes]
- 454 3. If you ran experiments...
- 455 (a) Did you include the code, data, and instructions needed to reproduce the main experi-  
456 mental results (either in the supplemental material or as a URL)? [Yes]
- 457 (b) Did you specify all the training details (e.g., data splits, hyperparameters, how they  
458 were chosen)? [Yes]
- 459 (c) Did you report error bars (e.g., with respect to the random seed after running experi-  
460 ments multiple times)? [Yes]
- 461 (d) Did you include the total amount of compute and the type of resources used (e.g., type  
462 of GPUs, internal cluster, or cloud provider)? [Yes]
- 463 4. If you are using existing assets (e.g., code, data, models) or curating/releasing new assets...
- 464 (a) If your work uses existing assets, did you cite the creators? [Yes]

- 465 (b) Did you mention the license of the assets? [Yes]  
466 (c) Did you include any new assets either in the supplemental material or as a URL? [N/A]  
467  
468 (d) Did you discuss whether and how consent was obtained from people whose data you're  
469 using/curating? [Yes]  
470 (e) Did you discuss whether the data you are using/curating contains personally identifiable  
471 information or offensive content? [N/A]  
472 5. If you used crowdsourcing or conducted research with human subjects...  
473 (a) Did you include the full text of instructions given to participants and screenshots, if  
474 applicable? [N/A]  
475 (b) Did you describe any potential participant risks, with links to Institutional Review  
476 Board (IRB) approvals, if applicable? [N/A]  
477 (c) Did you include the estimated hourly wage paid to participants and the total amount  
478 spent on participant compensation? [N/A]

|     |                                                                |           |
|-----|----------------------------------------------------------------|-----------|
| 479 | <b>Contents</b>                                                |           |
| 480 | <b>1 Introduction</b>                                          | <b>1</b>  |
| 481 | <b>2 Preliminary</b>                                           | <b>3</b>  |
| 482 | 2.1 Markov decision process . . . . .                          | 3         |
| 483 | 2.2 Policy gradient Theorem . . . . .                          | 3         |
| 484 | <b>3 Decentralized single-timescale actor-critic</b>           | <b>4</b>  |
| 485 | <b>4 Main Results</b>                                          | <b>6</b>  |
| 486 | 4.1 Assumptions . . . . .                                      | 6         |
| 487 | 4.2 Sample complexity under i.i.d. sampling . . . . .          | 6         |
| 488 | 4.3 Sample complexity under markovian sampling . . . . .       | 7         |
| 489 | 4.4 Proof sketch . . . . .                                     | 7         |
| 490 | <b>5 Numerical results</b>                                     | <b>9</b>  |
| 491 | <b>6 Conclusion and future direction</b>                       | <b>9</b>  |
| 492 | <b>A Experiment settings and additional simulation results</b> | <b>15</b> |
| 493 | <b>B Algorithm without local action</b>                        | <b>17</b> |
| 494 | <b>C Auxiliary lemmas</b>                                      | <b>18</b> |
| 495 | <b>D Supporting lemmas</b>                                     | <b>21</b> |
| 496 | D.1 Error of critic . . . . .                                  | 21        |
| 497 | D.2 Error of reward estimator . . . . .                        | 29        |
| 498 | D.3 Consensus error . . . . .                                  | 33        |
| 499 | D.4 Error of actor . . . . .                                   | 34        |
| 500 | <b>E Proof of main results</b>                                 | <b>37</b> |
| 501 | E.1 Proof of Theorem 1 . . . . .                               | 37        |
| 502 | E.2 Proof of Theorem 2 . . . . .                               | 41        |
| 503 | E.3 Proof of Theorem 3 . . . . .                               | 45        |
| 504 | <b>F Natural AC variant and its convergence</b>                | <b>46</b> |
| 505 | F.1 Decentralized natural Actor-Critic . . . . .               | 46        |
| 506 | F.2 Convergence of natural Actor-Critic . . . . .              | 47        |
| 507 | F.3 Proof of Theorem 4 . . . . .                               | 48        |
| 508 | <b>G Overview of communication complexity</b>                  | <b>53</b> |
| 509 | <b>H Policy gradient theorem</b>                               | <b>53</b> |



## 510 A Experiment settings and additional simulation results

511 In this section, we first introduce the experimental setting. Then, we present more experiments on the  
 512 comparison between the proposed algorithms and existing decentralized AC algorithms. Additionally,  
 513 we conduct ablation study on different consensus frequencies of the proposed algorithm.

514 **Experiment setting.** We adopt the grounded communication environment proposed in [19]. Our  
 515 task consists of  $N$  agents and the corresponding  $N$  landmarks inhabited in a two-dimension world,  
 516 where each agent can observe the relative position of other agents and landmarks. For every discrete  
 517 time step, agents take actions to move along certain directions, and receive their rewards. Agents  
 518 are rewarded based on the distance to their own landmark, and penalized if they collide with other  
 519 agents. The objective is to maximize the long-term averaged reward over all agents. Since we focus  
 520 on decentralized setting, each agent shall not know the target landmark of others, i.e., the reward  
 521 function of others. To exchange information, each agent is allowed to send their local information via  
 522 a fixed communication link. Through all the experiments, the agent number  $N$  is set to be 5, and the  
 523 discount factor  $\gamma$  is set to be 0.95.

524 **Comparison to double-loop decentralized AC under mini-batch update.** Since the algorithm  
 525 in [6] uses mini-batch update to reduce the variance during the update, we will compare the proposed  
 526 algorithms with [6] under different choices of actor’s batch sizes, critic’s batch sizes, and inner loop  
 527 sizes, respectively. Since their algorithm communicates noisy reward to achieve consensus, we will  
 528 use "SDAC-noi" to serve as baseline.

529 1. **Actor’s batch size.** We fix  $T_c = 50$ ,  $T'_c = 10$ ,  $N_c = 10$ ,<sup>2</sup> which is adopted by [6]. We  
 530 examine values of  $N$  in  $\{10, 50, 100\}$ . The results are in Figure 2a. We observe that the best  
 531 choice of actor’s batch size  $N$  is 50, and the proposed "SDAC-noi" converges faster than it  
 532 in terms of sample complexity.

533 2. **Critic’s batch size.** We fix  $T_c = 50$ ,  $T'_c = 10$ ,  $N = 100$ , which is adopted by [6]. We  
 534 examine values of  $N_c$  in  $\{2, 10, 50\}$ . The results are shown in Figure 2b. As we can see,  
 535 "DLDAC" with smaller critic’s batch sizes can achieve better sample complexity, indicating  
 536 that the variance of critic’s update is relatively small and the mini-batch update is not needed  
 537 for this task. Our proposed "SDAC-noi" achieves better convergence compared with the  
 538 double-loop decentralized AC under different choices of  $N_c$ .

539 3. **Inner loop size.** We fix  $T'_c = 10$ ,  $N = 100$ ,  $N_c = 10$ , which is adopted by [6]. We examine  
 540 values of  $T_c$  in  $\{5, 20\}$ . The results are shown in Figure 3. We can see that the proposed  
 541 "SDAC-noi" enjoys a better convergence in terms of sample complexity.

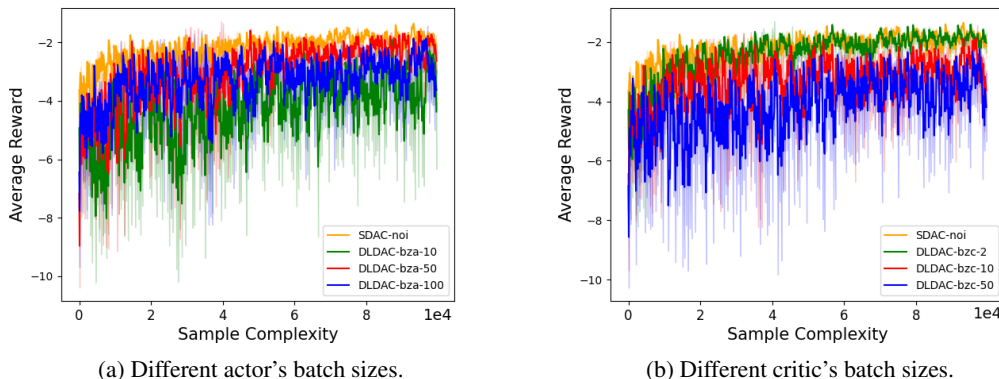

Figure 2: Comparison between the proposed algorithms and the double-loop decentralized AC algorithm that uses mini-batch update. The results are averaged over 10 Monte Carlo runs.

<sup>2</sup>Note that we adopt the notations in [6]. Here,  $T_c$  is the inner loop size,  $T'_c$  is the communication number for each outer loop,  $N$  is the batch size for actor’s update, and  $N_c$  is the batch size for critic’s update.

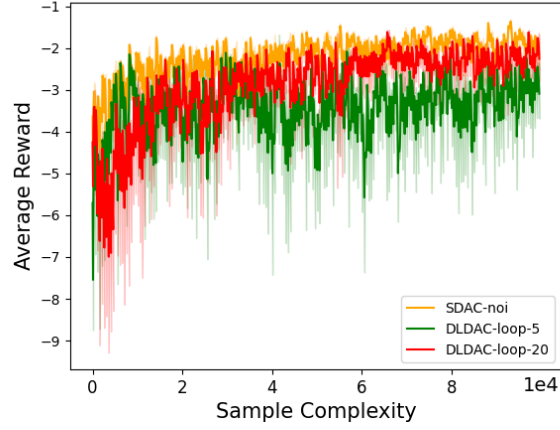

Figure 3: Comparison between the proposed algorithm and the double-loop decentralized AC algorithm under different inner loop sizes. The results are averaged over 10 Monte Carlo runs.

542 **Comparison to two-timescale decentralized AC.** Next, we compare the empirical performance  
 543 between single-timescale and two-timescale implementations. The baseline we compare here is the  
 544 existing decentralized two-timescale AC algorithm [38].

545 We use "TDAC-re" to denote the algorithm proposed in [38]. To compare with our proposed  
 546 Algorithm 2, we also implement a noisy reward version of "TDAC-re" and denote it by "TDAC-noi".  
 547 We fix  $K_c = 1$ ,  $K_r = 5$  for this experiment. We set  $\alpha_k = 0.01(k+1)^{-0.5}$ ,  $\beta_k = 0.1(k+1)^{-0.5}$ ,  
 548 and  $\eta_k = 0.1(k+1)^{-0.5}$  for "SDAC-re" and "SDAC-noi"; we set  $\alpha_k = 0.01(k+1)^{-0.6}$ ,  $\beta_k =$   
 549  $0.1(k+1)^{-0.4}$ , and  $\eta_k = 0.1(k+1)^{-0.4}$  for "TDAC-re" and "TDAC-noi". The sample complexity  
 550 complexity is presented in Figure 4. We can see that the convergence speed of "TDAC-noi" is  
 551 comparable to its single-timescale counterpart "SDAC-noi". However, when using reward estimator  
 552 for the global reward estimation, we observe that "SDAC-re" has much more stable convergence  
 behavior than "TDAC-re", and achieves significantly higher rewards.

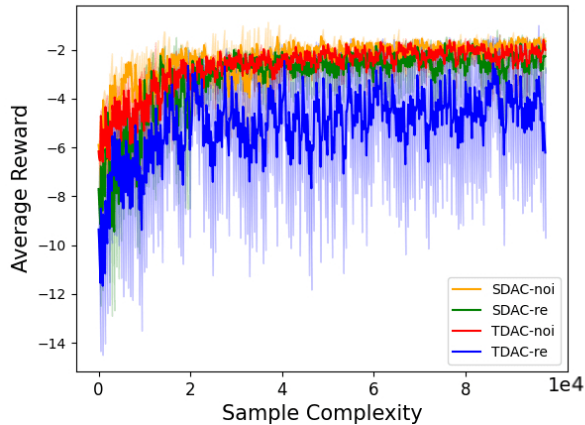

Figure 4: Comparison between the proposed algorithms and two-timescale decentralized AC algorithms [38]. The results are averaged over 10 Monte Carlo runs.

553

554 **Ablation on different consensus periods.** We compare the performance of "SDAC-noi" under  
 555 different choices of consensus periods  $K_c$ . In particular, we let  $\alpha_k = 0.01(k+1)^{-0.5}$ ,  $\beta_k =$   
 556  $0.1(k+1)^{-0.5}$ ,  $K_r = 1$  and examine the consensus periods  $K_c$  of 1, 5, 10, and 20, respectively.

557 The corresponding sample complexities and are summarized in Figure 5. Evidently, as the consensus  
558 period  $K_c$  increases, the convergence becomes slower and become relatively unstable. Therefore,  
559 when the communication cost is low, choosing a small  $K_c$  will yield a better performance. For  
560 this task, the consensus period  $K_c$  should be kept within 5 rounds in order to ensure a reasonable  
561 convergence. In Figure 5, we plot the communication complexity under the consensus periods of  
562 1 and 5. We can see that the communication complexity of "cons-5" surpasses "cons-1" during the  
563 training, indicating that it requires less rounds of communications to achieve better performance. Thus,  
564 when the communication complexity is high, we may use large  $K_c$  to achieve better communication  
565 complexity. When extending the model to different tasks, we may try different values of  $K_c$  to  
566 balance the sample complexity and communication complexity.

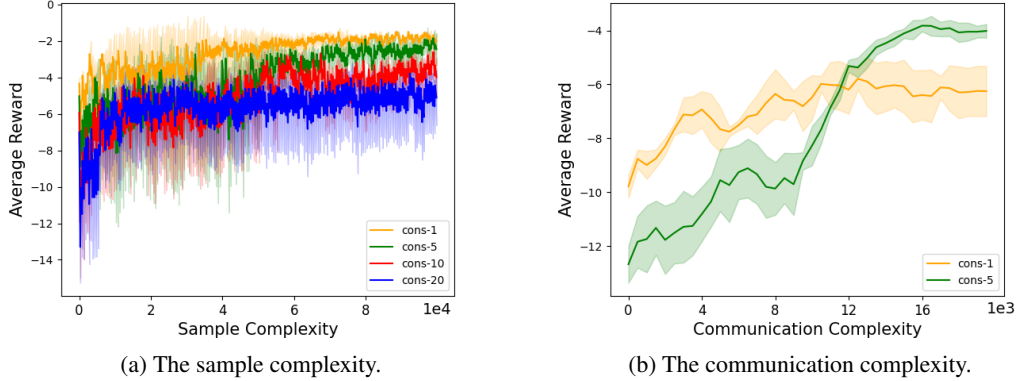

Figure 5: Ablation study on the consensus periods. The results are averaged over 10 Monte Carlo runs.

## 567 B Algorithm without local action

568 In this section, we introduce the variant of Algorithm 1 for preserving the privacy of local actions.  
569 The main difference is that instead of using a reward estimator to approximate the global reward,  
570 we now communicate the noisy local rewards for estimating the global rewards. Let  $r_k^i$  represents  
571  $r_k^i(s_k, a_k)$  for brevity. The reward estimation process goes as follow: for each agent  $i$ , we first  
572 produce a noisy local reward  $\tilde{r}_k^i = r_k^i(1 + z)$ , with  $z \sim \mathcal{N}(0, \sigma^2)$ . Thus, the noise level is controlled  
573 by the variance  $\sigma^2$ , which is chosen artificially. To estimate the global reward, each agent  $i$  first  
574 initialize the estimation as  $\tilde{r}_{t,0}^i = \tilde{r}_t^i$ . Then, each agent  $i$  perform the following consensus step for  $K_r$   
575 times, i.e.

$$\tilde{r}_{t,l+1}^i = \sum_{j=1}^N W^{ij} \tilde{r}_{t,l}^j, \quad l = 0, 1, \dots, K_r - 1. \quad (17)$$

576 The reward  $\tilde{r}_{k,K_r}^i$  will be used for estimating global reward for agent  $i$ . The error for the reward  
577 estimation, i.e.  $|\bar{r}_k - \tilde{r}_{k,K_r}^i|$  will converge to 0 linearly. Therefore, to reduce the error to  $\varepsilon$ , we need  
578  $K_r = \mathcal{O}(\log(\varepsilon^{-1}))$  rounds of communications.

579 The following theorem establishes the sample complexity of Algorithm 2 under Markovian sampling.

580 **Theorem 3.** Suppose Assumptions 1-5 hold. Consider the update of Algorithm 2 under Markovian  
581 sampling. Let  $\alpha_k = \frac{\bar{\alpha}}{\sqrt{K}}$  for some positive constant  $\bar{\alpha}$ ,  $\beta_k = \frac{C_\phi}{2\lambda_\phi} \alpha_k$ ,  $K_c = \mathcal{O}(\log(K^{1/4}))$ ,  
582  $K_r = \log(K^{1/2})$ . Then, we have

$$\begin{aligned} \frac{1}{K} \sum_{k=1}^K \sum_{i=1}^N \mathbb{E} [\|\omega_k^i - \omega^*(\theta_k)\|^2] &\leq \mathcal{O}\left(\frac{\log^2 K}{\sqrt{K}}\right) \\ \frac{1}{K} \sum_{k=1}^K \sum_{i=1}^N \mathbb{E} [\|\nabla_{\theta^i} F(\theta_k)\|^2] &\leq \mathcal{O}\left(\frac{\log^2 K}{\sqrt{K}}\right) + \mathcal{O}(\varepsilon_{app} + \varepsilon_{sp}), \end{aligned} \quad (18)$$

---

**Algorithm 2:** Decentralized single-timescale AC (noisy reward version)

---

```

1: Initialize: Actor parameter  $\theta_0$ , critic parameter  $\omega_0$ , initial state  $s_0$ .
2: for  $k = 0, \dots, K - 1$  do
3:   Option 1: i.i.d. sampling:
4:    $s_k \sim \mu_{\theta_k}(\cdot), a_k \sim \pi_{\theta_k}(\cdot|s_k), s_{k+1} \sim \mathcal{P}(\cdot|s_k, a_k)$ .
5:   Option 2: Markovian sampling:
6:    $a_k \sim \pi_{\theta_k}(\cdot|s_k), s_{k+1} \sim \mathcal{P}(\cdot|s_k, a_k)$ .
7:
8:   Periodical consensus: Compute  $\tilde{\omega}_k^i$  by (4).
9:
10:  for  $i = 0, \dots, N$  in parallel do
11:    Global reward estimation: Estimate  $\bar{r}_k(s_k, a_k)$  by (17).
12:    Critic update: Update  $\omega_{k+1}^i$  by (5).
13:    Actor update: Update  $\theta_{k+1}^i$  by (6).
14:  end for
15: end for

```

---

583 where  $C_9$  and  $C_{10}$  are positive constants defined in proof.

584 The Theorem 3 shows that Algorithm 2 has the same sample complexity as Algorithm 1; see  
585 Appendix E.3 for the proof. Algorithm 2 enjoys the advantage of preserving local actions and requiring  
586 less parameters since no reward estimator is needed. The cost is that we need to communicate  
587  $\mathcal{O}(\log(\varepsilon^{-1}))$  times for each iteration.

## 588 C Auxiliary lemmas

589 In this section, we provide some auxiliary lemmas, which serves as the preliminary for the proof of  
590 main theorems and lemmas.

591 **Lemma 4** ([40], Lemma 3.2). *Suppose Assumption 3 holds, then there exists a positive constant  $L$*   
592 *such that for all  $\theta, \theta' \in \mathbb{R}^{d_\theta}$ , we have  $\|\nabla J(\theta) - \nabla J(\theta')\| \leq L\|\theta - \theta'\|$ .*

593 **Lemma 5** ([24], Lemma 1). *Suppose Assumptions 4 holds, then there exists  $\kappa > 0, \rho \in [0, 1]$  such*  
594 *that for any  $\theta \in \mathbb{R}^{N d_\theta}$  we have*

$$\sup_{s_0 \in \mathcal{S}} d_{TV}(\mathbb{P}((s_k, a_k, s_{k+1}) \in \cdot | s_0, \pi_\theta), \mu_\theta \otimes \pi_\theta, \mathcal{P}) \leq \kappa \rho^k,$$

595 where  $\mu_\theta$  is the stationary distribution induced by  $\pi_\theta$  and transition kernel  $\mathcal{P}(\cdot|s, a)$ .

596 **Lemma 6** ([24], Lemma 2). *Suppose Assumption 4 holds, then for any  $\theta \in \mathbb{R}_\rho^d$ , we have*

$$d_{TV}(d_\theta, \mu_\theta) \leq 2(\log_\rho \kappa^{-1} + \frac{1}{1-\rho})(1-\gamma).$$

597 **Lemma 7** ([24], Lemma 4). *Suppose Assumption 3 holds, for any  $\theta_1, \theta_2 \in \mathbb{R}^{d_\theta}$  and  $s \in \mathcal{S}$ , there*  
598 *exists a positive constant  $L_V$  such that*

$$\begin{aligned} \|\nabla V_{\pi_{\theta_1}}(s)\| &\leq L_V \\ |V_{\pi_{\theta_1}}(s) - V_{\pi_{\theta_2}}(s)| &\leq L_V \|\theta_1 - \theta_2\|. \end{aligned}$$

599 **Lemma 8** ([32], Lemma A.1). *For any policy  $\theta_1$  and  $\theta_2$ , it holds that*

$$\begin{aligned} d_{TV}(\mu_{\theta_1}, \mu_{\theta_2}) &\leq |\mathcal{A}| L_\pi (\log_\rho \kappa^{-1} + (1-\rho)^{-1}) \|\theta_1 - \theta_2\| \\ d_{TV}(\mu_{\theta_1} \otimes \pi_{\theta_1}, \mu_{\theta_2} \otimes \pi_{\theta_2}) &\leq |\mathcal{A}| L_\pi (1 + \log_\rho \kappa^{-1} + (1-\rho)^{-1}) \|\theta_1 - \theta_2\| \\ d_{TV}(\mu_{\theta_1} \otimes \pi_{\theta_1} \otimes \mathcal{P}, \mu_{\theta_2} \otimes \pi_{\theta_2} \otimes \mathcal{P}) &\leq |\mathcal{A}| L_\pi (1 + \log_\rho \kappa^{-1} + (1-\rho)^{-1}) \|\theta_1 - \theta_2\|. \end{aligned}$$

600 We will define  $L_\mu := |\mathcal{A}| L_\pi (\log_\rho \kappa^{-1} + (1-\rho)^{-1})$  for the proof of main theorems and lemmas.

601 **Lemma 9** ([5], Lemma F.3). *For a doubly stochastic matrix  $W \in \mathbb{R}^{N \times N}$  and the difference matrix*  
602  *$Q := I - \frac{1}{N} \mathbf{1}\mathbf{1}^T$ , it holds that for any matrix  $H \in \mathbb{R}^{N \times N}$ ,  $\|W^k H\|_F \leq \nu^k \|QH\|_F$ , where  $\nu$  is the*  
603 *second largest singular value of  $W$ .*

604 **Lemma 10** (descent lemma in high dimension). *Consider the mapping  $F : \mathbb{R}^n \rightarrow \mathbb{R}^m$ . If there exists*  
 605 *a positive constant  $L$  such that*

$$\|\nabla F(x) - \nabla F(y)\|_F \leq L\|x - y\|, \forall x, y \in \text{dom}(F), \quad (19)$$

606 *then the following holds*

$$\|F(y) - F(x) - \nabla F(x)(y - x)\| \leq \frac{L_1}{2} \sqrt{m} \|y - x\|^2.$$

607 *Proof.* Observe that (19) directly implies the smoothness of each entry  $F_i$ :

$$\|\nabla F_i(x) - \nabla F_i(y)\| \leq \|\nabla F(x) - \nabla F(y)\|_F \leq L_1 \|x - y\|.$$

608 Define

$$z_i(x, y) := F_i(y) - F_i(x) - \nabla F_i(x)^T (y - x).$$

609 We have

$$\begin{aligned} \|F(y) - F(x) - \nabla F(x)(y - x)\| &= \sqrt{\sum_{i=1}^m z_i(x, y)^2} \\ &\leq \sqrt{m \left(\frac{L_1}{2} \|y - x\|^2\right)^2} \\ &= \frac{L_1}{2} \sqrt{m} \|y - x\|^2, \end{aligned}$$

610 where the inequality follows the descent lemma.  $\square$

611 **Lemma 11** (Lipschitz property of multiplication). *Suppose  $f(x)$  and  $g(x)$  are two functions bounded*  
 612 *by  $C_f$  and  $C_g$ , and are  $L_f$ - and  $L_g$ -Lipschitz continuous, then  $f(x)g(x)$  is  $C_f L_g + C_g L_f$ -Lipschitz*  
 613 *continuous.*

*Proof.*

$$\begin{aligned} \|f(x_1)g(x_1) - f(x_2)g(x_2)\| &= \|f(x_1)g(x_1) - f(x_1)g(x_2) + f(x_1)g(x_2) - f(x_2)g(x_2)\| \\ &\leq \|f(x_1)\| \|g(x_1) - g(x_2)\| + \|f(x_1) - f(x_2)\| \|g(x_2)\| \\ &\leq (C_f L_g + C_g L_f) \|x_1 - x_2\|. \end{aligned}$$

614  $\square$

615 **Lemma 12** (invertible property of matrix). *If a square matrix  $A$  satisfying  $\lim_{t \rightarrow \infty} A^t = 0$ , or*  
 616 *equivalently,  $|\lambda(A)| < 1$ , then  $I - A$  is invertible.*

*Proof.*

$$\begin{aligned} (I - A) \lim_{t \rightarrow \infty} \sum_{i=0}^t A^i &= \lim_{t \rightarrow \infty} \left[ \sum_{i=0}^t A^i - \sum_{i=1}^{t+1} A^i \right] \\ &= I - \lim_{t \rightarrow \infty} A^{t+1} \\ &= I. \end{aligned}$$

617 Since  $I$  is invertible, by the rank inequality  $\text{rank}(AB) \leq \min(\text{rank}(A), \text{rank}(B))$ ,  $I - A$  and  
 618  $\lim_{t \rightarrow \infty} \sum_{i=0}^t A^i$  will be invertible.  $\square$

619 **Lemma 13** (mismatch between Markovian sampling and stationary distribution). *Consider the*  
 620 *Markov chain:*

$$s_{k-z} \xrightarrow{\theta_{k-z}} a_{k-z} \xrightarrow{\mathcal{P}} s_{k-z+1} \xrightarrow{\theta_{k-z+1}} a_{k-z+1} \cdots \xrightarrow{\theta_{k-1}} a_{k-1} \xrightarrow{\mathcal{P}} s_k \xrightarrow{\theta_k} a_k \xrightarrow{\mathcal{P}} s_{k+1}.$$

621 *Also consider the auxiliary Markov chain with fixed policy:*

$$s_{k-z} \xrightarrow{\theta_{k-z}} a_{k-z} \xrightarrow{\mathcal{P}} s_{k-z+1} \xrightarrow{\theta_{k-z}} \tilde{a}_{k-z+1} \cdots \xrightarrow{\theta_{k-z}} \tilde{a}_{k-1} \xrightarrow{\mathcal{P}} \tilde{s}_k \xrightarrow{\theta_{k-z}} \tilde{a}_k \xrightarrow{\mathcal{P}} \tilde{s}_{k+1}.$$

622 Let  $\xi_k := (s_k, a_k, s_{k+1})$  be sampled from chain 1, and  $\tilde{\xi}_k := (s_k, a_k, s_{k+1})$  be sampled from chain  
 623 2. Then we have

$$d_{TV}(\mathbb{P}(\xi_k \in \cdot | \theta_{k-z}, s_{k-z+1}), \mathbb{P}(\tilde{\xi}_k \in \cdot | \theta_{k-z}, s_{k-z+1})) \leq \frac{1}{2} \sum_{m=0}^{z-1} |\mathcal{A}| L_\pi \|\theta_{k-m} - \theta_{k-z}\|.$$

*Proof.*

$$\begin{aligned} & d_{TV}(\mathbb{P}(\xi_k \in \cdot), \mathbb{P}(\tilde{\xi}_k \in \cdot)) \\ &= \frac{1}{2} \int_{s \in \mathcal{S}} \int_{s' \in \mathcal{S}} \sum_{a \in \mathcal{A}} |\mathbb{P}(s_k = ds, a_k = a, s_{k+1} = ds') - \mathbb{P}(\tilde{s}_k = ds, \tilde{a}_k = a, \tilde{s}_{k+1} = ds')| \\ &= \frac{1}{2} \int_{s \in \mathcal{S}} \sum_{a \in \mathcal{A}} |\mathbb{P}(s_k = ds, a_k = a) - \mathbb{P}(\tilde{s}_k = ds, \tilde{a}_k = a)| \int_{s' \in \mathcal{S}} \mathbb{P}(s_{k+1} = ds' | s_k = ds, a_k = a) \\ &= \frac{1}{2} \int_{s \in \mathcal{S}} \sum_{a \in \mathcal{A}} |\mathbb{P}(s_k = ds, a_k = a) - \mathbb{P}(\tilde{s}_k = ds, \tilde{a}_k = a)| \\ &= \frac{1}{2} \int_{s \in \mathcal{S}} \sum_{a \in \mathcal{A}} |\mathbb{P}(s_k = ds) \pi_{\theta_k}(a|ds) - \mathbb{P}(\tilde{s}_k = ds) \pi_{\theta_{k-z}}(a|ds)| \\ &\leq \frac{1}{2} \int_{s \in \mathcal{S}} \sum_{a \in \mathcal{A}} |\mathbb{P}(s_k = ds) \pi_{\theta_k}(a|ds) - \mathbb{P}(s_k = ds) \pi_{\theta_{k-z}}(a|ds)| \\ &\quad + \frac{1}{2} \int_{s \in \mathcal{S}} \sum_{a \in \mathcal{A}} |\mathbb{P}(s_k = ds) \pi_{\theta_{k-z}}(a|ds) - \mathbb{P}(\tilde{s}_k = ds) \pi_{\theta_{k-z}}(a|ds)| \\ &\leq \frac{1}{2} \int_{s \in \mathcal{S}} |\mathcal{A}| L_\pi \|\theta_k - \theta_{k-z}\| \mathbb{P}(s_k = ds) \\ &\quad + \frac{1}{2} \int_{s \in \mathcal{S}} |\mathbb{P}(s_k = ds) - \mathbb{P}(\tilde{s}_k = ds)| \sum_{a \in \mathcal{A}} \pi_{\theta_{k-z}}(a|ds) \\ &= \frac{1}{2} |\mathcal{A}| L_\pi \|\theta_k - \theta_{k-z}\| + d_{TV}(\mathbb{P}(s_k \in \cdot), \mathbb{P}(\tilde{s}_k \in \cdot)). \end{aligned} \tag{20}$$

624 The second term can be bounded as

$$\begin{aligned} & d_{TV}(\mathbb{P}(s_k \in \cdot), \mathbb{P}(\tilde{s}_k \in \cdot)) \\ &= \frac{1}{2} \int_{s' \in \mathcal{S}} |\mathbb{P}(s_k = ds) - \mathbb{P}(\tilde{s}_k = ds)| \\ &= \frac{1}{2} \int_{s' \in \mathcal{S}} \left| \sum_{a \in \mathcal{A}} \int_{s \in \mathcal{S}} \mathbb{P}(s_{k-1} = ds, a_{k-1} = a, s_k = ds') - \mathbb{P}(\tilde{s}_{k-1} = ds, \tilde{a}_{k-1} = a, \tilde{s}_k = ds') \right| \\ &\leq \frac{1}{2} \int_{s' \in \mathcal{S}} \sum_{a \in \mathcal{A}} \int_{s \in \mathcal{S}} |\mathbb{P}(s_{k-1} = ds, a_{k-1} = a, s_k = ds') - \mathbb{P}(\tilde{s}_{k-1} = ds, \tilde{a}_{k-1} = a, \tilde{s}_k = ds')| \\ &= d_{TV}(\mathbb{P}(\xi_{k-1} \in \cdot), \mathbb{P}(\tilde{\xi}_{k-1} \in \cdot)). \end{aligned} \tag{21}$$

625 Combined (20) and (21), we obtain

$$d_{TV}(\mathbb{P}(\xi_k \in \cdot), \mathbb{P}(\tilde{\xi}_k \in \cdot)) \leq d_{TV}(\mathbb{P}(\xi_{k-1} \in \cdot), \mathbb{P}(\tilde{\xi}_{k-1} \in \cdot)) + \frac{1}{2} |\mathcal{A}| L_\pi \|\theta_k - \theta_{k-z}\|.$$

626 Sum over  $z - 1$  steps, we obtain

$$\begin{aligned} d_{TV}(\mathbb{P}(\xi_k \in \cdot), \mathbb{P}(\tilde{\xi}_k \in \cdot)) &\leq d_{TV}(\mathbb{P}(\xi_{k-z} \in \cdot), \mathbb{P}(\tilde{\xi}_{k-z} \in \cdot)) + \frac{1}{2} \sum_{m=0}^{z-1} |\mathcal{A}| L_\pi \|\theta_{k-m} - \theta_{k-z}\| \\ &= \frac{1}{2} \sum_{m=0}^{z-1} |\mathcal{A}| L_\pi \|\theta_{k-m} - \theta_{k-z}\|. \end{aligned}$$

627

□



## 628 D Supporting lemmas

629 Before proceeding to the analysis of critic variables, we firstly justify the uniqueness of optimal  
630 solution for critic and reward estimator variables. Define the following notations

$$\begin{aligned}
A_{\theta,\phi} &:= \mathbb{E}[\phi(s)(\gamma\phi(s')^T - \phi(s)^T)] \\
A_{\theta,\varphi} &:= \mathbb{E}[\varphi(s,a)\varphi(s,a)^T] \\
b_{\theta,\phi} &:= \mathbb{E}[\phi(s)\bar{r}(s,a)] \\
b_{\theta,\varphi} &:= \mathbb{E}[\varphi(s,a)\bar{r}(s,a)],
\end{aligned} \tag{22}$$

631 with expectation taken from  $s \sim \mu_\theta(s)$ ,  $a \sim \pi_\theta$ ,  $s' \sim \mathcal{P}$ . The optimal critic and reward estimator  
632 variables given policy  $\theta$  will satisfy  $A_{\theta,\phi}\omega^*(\theta) + b_{\theta,\phi} = 0$ ;  $A_{\theta,\varphi}\lambda^*(\theta) + b_{\theta,\varphi} = 0$ . By Assumption  
633 2,  $A_{\theta,\phi}$  and  $A_{\theta,\varphi}$  are negative definite with largest eigenvalue  $\lambda_\phi$  and  $\lambda_\varphi$ , which ensures the unique  
634 solution  $\omega^*(\theta) = -A_{\theta,\phi}^{-1}b_{\theta,\phi}$ ;  $\lambda^*(\theta) = -A_{\theta,\varphi}^{-1}b_{\theta,\varphi}$ . Let  $R_\omega := \frac{r_{\max}}{\lambda_\phi}$ ,  $R_\lambda := \frac{r_{\max}}{\lambda_\varphi}$ . Then the norm of  
635 optimal solutions will be bounded as  $\|\omega^*(\theta)\| \leq R_\omega$ ,  $\|\lambda^*(\theta)\| \leq R_\lambda$ , which justifies the projection  
636 step of the Algorithm 1.

637 To study the error of critic, we introduce the following notations

$$\begin{aligned}
\delta^i(\xi, \theta) &:= r^i(s, a) + \gamma V_\theta(s') - V_\theta(s) \\
\delta(\xi, \theta) &:= \bar{r}(s, a) + \gamma V_\theta(s') - V_\theta(s) \\
\tilde{\delta}(\xi, \omega) &:= \bar{r}(s, a) + \gamma\phi(s')^T\omega - \phi(s)^T\omega \\
\hat{\delta}(\xi, \omega, \lambda) &:= \varphi(s, a)^T\lambda + \gamma\phi(s')^T\omega - \phi(s)^T\omega,
\end{aligned} \tag{23}$$

638 where we overwrite  $V_{\pi_\theta}$  as  $V_\theta$  for simplicity.

639 For the ease of expression, we further define

$$\begin{aligned}
g_a^i(\xi, \omega, \lambda) &:= \hat{\delta}(\xi, \omega, \lambda)\psi_{\theta^i}(s, a^i) \\
g_c^i(\xi, \omega) &:= \delta^i(\xi, \omega)\phi(s) \\
\bar{g}_c(\xi, \omega) &:= \tilde{\delta}(\xi, \omega)\phi(s) \\
g_c(\theta, \omega) &:= \mathbb{E}_{\xi \sim \mu_\theta}[\bar{g}_c(\xi, \omega)].
\end{aligned} \tag{24}$$

640 We will start with the error of averaged critic parameter first. The following lemma characterizes the  
641 descent of averaged critic variables under i.i.d. sampling.

### 642 D.1 Error of critic

643 We first present several useful lemmas and propositions, which serves as the preliminary for estab-  
644 lishing the approximate descent property of the critic variables' optimal gap.

645 **Proposition 1** (Lipschitz continuity of  $\omega^*(\theta)$  [32]). *Suppose Assumptions 2 and 4 hold, then there*  
646 *exists a positive constant  $L_\omega$  such that for any  $\theta_1, \theta_2 \in \mathbb{R}^{N^{d_\theta}}$ , we have*

$$\|\omega^*(\theta_1) - \omega^*(\theta_2)\| \leq L_\omega \|\theta_1 - \theta_2\|.$$

647 **Lemma 14** (smoothness of stationary distribution). *Suppose Assumptions 1, 3, and 4 hold, then for*  
648 *any  $\theta, \theta' \in \mathbb{R}^d$ , there exists a positive constant  $L_{\mu,1}$  such that*

$$\|\nabla\mu_\theta(s) - \nabla\mu_{\theta'}(s)\| \leq L_{\mu,1} \|\theta - \theta'\|.$$

649 The proof of this Lemma consists of two main steps: 1) Derive the expression of the gradient and 2)  
650 establish that the gradient is Lipschitz continuous. For the first part, we follow the main idea in [2].

651 *Proof.* For a given policy  $\pi_\theta$ , we define the transition probability  $P_\theta(s|s') := \sum_a \pi_\theta(a|s')P(s|s', a)$ .  
652 By the Assumption 4, there exists a stationary distribution  $\mu_\theta(s)$  which satisfies for all state  $s$

$$\mu_\theta(s) = \sum_{s' \in \mathcal{S}} \mu_\theta(s')P_\theta(s|s') \tag{25}$$

653 Define the following notations

$$\begin{aligned}
\mu_\theta &:= [\mu_\theta(s_1), \mu_\theta(s_2), \dots, \mu_\theta(s_n)]^T & \mathbb{R}^{|\mathcal{S}| \times 1} \\
P_\theta(s) &:= [P_\theta(s|s_1), P_\theta(s|s_2), \dots, P_\theta(s|s_n)]^T & \mathbb{R}^{|\mathcal{S}| \times 1} \\
P(\theta) &:= [P_\theta(s_1), P_\theta(s_2), \dots, P_\theta(s_n)] & \mathbb{R}^{|\mathcal{S}| \times |\mathcal{S}|} \\
\nabla \mu_\theta &:= [\nabla \mu_\theta(s_1), \nabla \mu_\theta(s_2), \dots, \nabla \mu_\theta(s_n)] & \mathbb{R}^{d_\theta \times |\mathcal{S}|} \\
\nabla P_\theta(s) &:= [\nabla P_\theta(s|s_1), \nabla P_\theta(s|s_2), \dots, \nabla P_\theta(s|s_n)] & \mathbb{R}^{d_\theta \times |\mathcal{S}|}
\end{aligned}$$

654 Upon taking derivative with respect to  $\theta$  on both sides of (25), we have

$$\begin{aligned}
\nabla \mu_\theta(s) &= \sum_{s' \in \mathcal{S}} \nabla \mu_\theta(s') P_\theta(s|s') + \mu_\theta(s') \nabla_\theta P_\theta(s|s') \\
&= \nabla \mu_\theta P_\theta(s) + \nabla P_\theta(s) \mu_\theta
\end{aligned} \tag{26}$$

655 (26) can be written in compact form as

$$\nabla \mu_\theta = \nabla \mu_\theta P(\theta) + [\nabla P_\theta(s_1) \mu_\theta, \dots, \nabla P_\theta(s_n) \mu_\theta] \tag{27}$$

656 Therefore, we have

$$\begin{aligned}
[\nabla P_\theta(s_1) \mu_\theta, \dots, \nabla P_\theta(s_n) \mu_\theta] &= \nabla \mu_\theta (I - P(\theta)) \\
&= \nabla \mu_\theta (I - (P(\theta) - e \mu_\theta^T)),
\end{aligned}$$

657 where the second inequality is due to  $\nabla \mu_\theta e = \nabla(\mu_\theta e) = \nabla 1 = 0$ .

658 We now show that  $I - (P(\theta) - e \mu_\theta^T)$  is invertible. The first step is to show  $\lim_{t \rightarrow \infty} (P(\theta) - e \mu_\theta^T)^t = 0$ .

659 Let  $P, \mu$  represent  $P(\theta), \mu_\theta$  for simplicity, we first show  $(P - e \mu^T)^t = P^t - P^{t-1} e \mu^T$  by induction.

660 Observe that when  $t = 1$ , this is trivially satisfied. Suppose the equality holds for  $t = k$ , then

$$\begin{aligned}
(P - e \mu^T)^{k+1} &= (P^k - P^{k-1} e \mu^T) P - (P^k - P^{k-1} e \mu^T) e \mu^T \\
&= P^{k+1} - P^{k-1} e \mu^T - P^k e \mu^T + P^{k-1} (e \mu^T)^2 \\
&= P^{k+1} - P^k e \mu^T,
\end{aligned}$$

661 where the second equality is due to (25) such that  $e \mu^T P = e \mu^T$  and the last equality is due to  
662  $\mu^T e = 1$ .

663 Therefore, we have

$$\lim_{t \rightarrow \infty} (P(\theta) - e \mu_\theta^T)^t = \lim_{t \rightarrow \infty} (P(\theta)^t - P(\theta)^{t-1} e \mu_\theta^T) = e \mu_\theta^T - e \mu_\theta^T = 0,$$

664 which together with Lemma 12 justifies that  $I - (P(\theta) - e \mu_\theta^T)$  is invertible. Thus, we have

$$\nabla \mu_\theta = (I - (P(\theta) - e \mu_\theta^T))^{-1} [\nabla P_\theta(s_1) \mu_\theta, \dots, \nabla P_\theta(s_n) \mu_\theta]. \tag{28}$$

665 We will utilize Lemma 11 to prove the Lipschitz property of  $\nabla \mu_\theta$ . We first show the Lipschitz

666 continuous of the first term. Let  $A(\theta)$  to represent  $I - (P(\theta) - e \mu_\theta^T)$ , then we have

$$\begin{aligned}
\|A(\theta_1) - A(\theta_2)\| &= \|P(\theta_1) - P(\theta_2) + e(\mu_{\theta_2} - \mu_{\theta_1})^T\| \\
&\leq \|P(\theta_1) - P(\theta_2)\| + \|e(\mu_{\theta_2} - \mu_{\theta_1})^T\| \\
&= \sqrt{\sum_{s, s' \in \mathcal{S}} |\sum_{a \in \mathcal{A}} (\pi_{\theta_1}(a|s') - \pi_{\theta_2}(a|s')) P(s|s', a)|^2} + \sqrt{|\mathcal{S}|} \|\mu_{\theta_2} - \mu_{\theta_1}\| \\
&\leq \sqrt{\sum_{s, s' \in \mathcal{S}} (\sum_{a \in \mathcal{A}} |(\pi_{\theta_1}(a|s') - \pi_{\theta_2}(a|s')) P(s|s', a)|)^2} + \sqrt{|\mathcal{S}|} \|\mu_{\theta_2} - \mu_{\theta_1}\| \\
&\leq \sqrt{\sum_{s' \in \mathcal{S}} |\mathcal{A}|^2 L_\pi^2 \|\theta_1 - \theta_2\|^2 \sum_{s \in \mathcal{S}} P(s|s', a)^2} + \sqrt{|\mathcal{S}|} L_\mu \|\theta_1 - \theta_2\| \\
&= \sqrt{|\mathcal{S}|} (|\mathcal{A}| L_\pi + L_\mu) \|\theta_1 - \theta_2\|.
\end{aligned}$$

667 where the second inequality uses triangle inequality. The last inequality is due to Lipschitz continuous  
668 of the policy specified in Assumption 3, and Lipschitz continuous of  $\mu_\theta$  implied by Lemma 7.

669 To see that  $A^{-1}(\theta)$  is Lipschitz continuous and bounded, observe that

$$\begin{aligned} \|A^{-1}(\theta_1) - A^{-1}(\theta_2)\| &= \|A^{-1}(\theta_2)(A(\theta_2) - A(\theta_1))A^{-1}(\theta_1)\| \\ &\leq \|A^{-1}(\theta_2)\| \|A^{-1}(\theta_1)\| \|A(\theta_2) - A(\theta_1)\| \\ &\leq \sqrt{|\mathcal{S}|} (|\mathcal{A}|L_\pi + L_\mu) \|A^{-1}(\theta_2)\| \|A^{-1}(\theta_1)\| \|\theta_2 - \theta_1\|, \end{aligned} \quad (29)$$

670 where the first inequality uses Cauchy-Schwartz inequality, and the last inequality uses the Lipschitz  
671 continuous of  $A(\theta)$  in (29). Since  $\|A(\theta)\|$  is bounded,  $\|A^{-1}(\theta)\|$  is also bounded (due to invertibility),  
672 which justifies that the first term in (28) is Lipschitz continuous and bounded.

673 We now consider the second term in (28). For any state  $s$

$$\begin{aligned} \|\nabla P_{\theta_1}(s)\mu_{\theta_1} - \nabla P_{\theta_2}(s)\mu_{\theta_2}\| &= \|\nabla P_{\theta_1}(s)(\mu_{\theta_1} - \mu_{\theta_2}) + (\nabla P_{\theta_1}(s) - \nabla P_{\theta_2}(s))\mu_{\theta_2}\| \\ &\leq \|\nabla P_{\theta_1}(s)(\mu_{\theta_1} - \mu_{\theta_2})\| + \|(\nabla P_{\theta_1}(s) - \nabla P_{\theta_2}(s))\mu_{\theta_2}\| \\ &\leq \|\nabla P_{\theta_1}(s)\| \|\mu_{\theta_1} - \mu_{\theta_2}\| + \|\nabla P_{\theta_1}(s) - \nabla P_{\theta_2}(s)\| \|\mu_{\theta_2}\| \\ &\leq \sum_{s' \in \mathcal{S}} \sum_{a \in \mathcal{A}} \|\nabla \pi_{\theta_1}(a|s')P(s|s', a)\| L_\mu \|\theta_1 - \theta_2\| \\ &\quad + \sum_{s' \in \mathcal{S}} \sum_{a \in \mathcal{A}} \|(\nabla \pi_{\theta_1}(a|s') - \nabla \pi_{\theta_2}(a|s'))P(s|s', a)\| \\ &\leq |\mathcal{S}| |\mathcal{A}| (C_\pi L_\mu + L_\pi) \|\theta_1 - \theta_2\|, \end{aligned}$$

674 which justifies the Lipschitz continuous of  $\nabla P_\theta(s)\mu_\theta$ . Define  $B(\theta) :=$   
675  $[\nabla P_\theta(s_1)\mu_\theta, \dots, \nabla P_\theta(s_n)\mu_\theta]$ , we have

$$\|B(\theta_1) - B(\theta_2)\| \leq |\mathcal{S}|^{3/2} |\mathcal{A}| (C_\pi L_\mu + L_\pi) \|\theta_1 - \theta_2\|.$$

676 Since  $\nabla \mu_\theta = A^{-1}(\theta)B(\theta)$ , with  $A^{-1}(\theta)$  and  $B(\theta)$  being Lipschitz continuous and bounded. There-  
677 fore, according to Lemma 11, there exists a positive constant  $L_{\mu,1}$  which satisfies

$$\|\nabla \mu_{\theta_1} - \nabla \mu_{\theta_2}\| \leq L_{\mu,1} \|\theta_1 - \theta_2\|.$$

678 □

679 **Proposition 2** (Lipschitz continuity of  $\nabla_\theta \omega^*(\theta)$  [4]). *Suppose Assumptions 1-4 hold, then there*  
680 *exists a positive constant  $L_{\omega,2}$  such that*

$$\|\nabla_\theta \omega^*(\theta_1) - \nabla_\theta \omega^*(\theta_2)\|_F \leq L_{\omega,2} \|\theta_1 - \theta_2\|.$$

681 *Proof.* The proof follows the derivation of Proposition 8 of [4]. However, they make assumption that  
682  $\mu_\theta(s)$  is Lipschitz continuous, which we have justified in Lemma 14. We present the proof for the  
683 completeness.

684 We have  $\omega^*(\theta) = -A_{\theta,\phi}^{-1} b_{\theta,\phi}$ , where  $A_{\theta,\phi}$  is defined in (22). The Jacobian of  $\omega^*(\theta)$  can be calculated  
685 as

$$\begin{aligned} \nabla_\theta \omega^*(\theta) &= -\nabla_\theta (A_{\theta,\phi}^{-1} b_{\theta,\phi}) \\ &= -A_{\theta,\phi}^{-1} (\nabla_\theta A_{\theta,\phi}) A_{\theta,\phi}^{-1} b_{\theta,\phi} - A_{\theta,\phi} (\nabla_\theta b_{\theta,\phi}). \end{aligned} \quad (30)$$

686 We can utilize Lemma 11 to show the Lipschitz continuity of  $\nabla \omega^*(\theta)$ . We have to verify the Lipschitz  
687 continuity and boundedness of  $A_{\theta,\phi}^{-1}$ ,  $b_{\theta,\phi}$ ,  $\nabla_\theta A_{\theta,\phi}$ , and  $\nabla_\theta b_{\theta,\phi}$ .

688 The Lipschitz continuity and boundedness of  $A_{\theta,\phi}^{-1}$  has been shown in (29). Let  $b_1$  and  $b_2$  represent  
689  $b_{\theta_1,\phi}$ ,  $b_{\theta_2,\phi}$ , we have

$$\begin{aligned} \|b_1 - b_2\| &= \|\mathbb{E}[\bar{r}(s, a, s')\phi(s)] - \mathbb{E}[r(\tilde{s}, \tilde{a}, \tilde{s}')\phi(\tilde{s})]\| \\ &\leq \sup_{s, a, s'} \|r(s, a, s')\phi(s)\| \|\mathbb{P}((s, a, s' \in \cdot)) - \mathbb{P}((\tilde{s}, \tilde{a}, \tilde{s}' \in \cdot))\|_{TV} \\ &\leq r_{\max} \|\mathbb{P}((s, a, s' \in \cdot)) - \mathbb{P}((\tilde{s}, \tilde{a}, \tilde{s}' \in \cdot))\|_{TV} \\ &\leq 2|\mathcal{A}|L_\pi (1 + \log_\rho \kappa^{-1} + (1 - \rho)^{-1}) \|\theta_1 - \theta_2\|, \end{aligned}$$

690 where the last inequality follows Lemma 8.

691 We now analyze  $\nabla_{\theta} A_{\theta, \phi}$ . We first define

$$A(s, s') := \phi(s)(\gamma\phi(s') - \phi(s))^T, \quad b(s, a, s') := r(s, a, s')\phi(s).$$

692 as

$$\begin{aligned} \nabla_{\theta} A_{\theta, \phi} &= \nabla_{\theta} \left( \sum_{s, a, s'} \mu_{\theta}(s) \pi_{\theta}(a|s) P(s'|s, a) A(s, s') \right) \\ &= \sum_{s, a, s'} [\nabla_{\theta} \mu_{\theta}(s) \pi_{\theta}(a|s) P(s'|s, a) A(s, s') + \mu_{\theta} \nabla_{\theta} \pi_{\theta}(a|s) P(s'|s, a) A(s, s')]. \end{aligned}$$

693 By Lemma 14 and Lemma 8, and Assumption 3,  $\mu_{\theta}(s)$ ,  $\pi_{\theta}(a|s)$ ,  $\nabla_{\theta} \mu_{\theta}(s)$ ,  $\nabla_{\theta} \pi_{\theta}(a|s)$  are Lipschitz  
694 continuous and bounded. Therefore,  $\nabla_{\theta} A_{\theta, \phi}$  is Lipschitz and bounded.

695 Finally, we analyze  $\nabla_{\theta} b_{\theta, \phi}$  by following the same technique.

$$\begin{aligned} \nabla_{\theta} b_{\theta, \phi} &= \nabla_{\theta} \left( \sum_{s, a, s'} \mu_{\theta}(s) \pi_{\theta}(a|s) P(s'|s, a) b(s, a, s') \right) \\ &= \sum_{s, a, s'} [\nabla_{\theta} \mu_{\theta}(s) \pi_{\theta}(a|s) P(s'|s, a) b(s, a, s') + \mu_{\theta}(s) \nabla_{\theta} \pi_{\theta}(a|s) P(s'|s, a) b(s, a, s')]. \end{aligned}$$

696 By Lemma 14 and Lemma 8, and Assumption 3,  $\mu_{\theta}(s)$ ,  $\pi_{\theta}(a|s)$ ,  $\nabla_{\theta} \mu_{\theta}(s)$ ,  $\nabla_{\theta} \pi_{\theta}(a|s)$  are Lipschitz  
697 continuous and bounded. Thus,  $\nabla_{\theta} b_{\theta, \phi}$  is bounded and Lipschitz continuous.

698 We have shown the Lipschitz continuity and boundedness of  $A_{\theta, \phi}^{-1}$ ,  $b_{\theta, \phi}$ ,  $\nabla_{\theta} A_{\theta, \phi}$ , and  $\nabla_{\theta} b_{\theta, \phi}$ .  
699 Therefore, by applying Lemma 11, we conclude that there exists a positive constant  $L_{\omega, 2}$  such that  
700  $\nabla_{\theta} \omega^*(\theta)$  in (30) is  $L_{\omega, 2}$ -Lipschitz continuous.  $\square$

701 **Lemma 15** (descent of critic's optimal gap (i.i.d. sampling)). *Suppose Assumptions 1-4 hold, with*  
702  *$\omega_{k+1}$  generated by Algorithm 1 given  $\omega_k$  and  $\theta_k$  under i.i.d. sampling, then the following holds*

$$\begin{aligned} \mathbb{E} \|\bar{\omega}_{k+1} - \omega^*(\theta_{k+1})\|^2 &\leq (1 + 4L_{\omega, 2}^2 N \alpha_k + \frac{L_{\omega, 2}^2 C_{\theta}^2 N^2 \alpha_k^2}{2}) \mathbb{E} \|\bar{\omega}_{k+1} - \omega^*(\theta_k)\|^2 \\ &\quad + (\frac{L_{\omega, 2}^2 C_{\theta}^2 N^2}{2} + L_{\omega}^2 C_{\theta}^2 N^2) \alpha_k^2 + \frac{\alpha_k}{4} \sum_{i=1}^N \|\mathbb{E}[g_a^i(\xi_k, \omega_{k+1}^i, \lambda_{k+1}^i)]\|^2. \end{aligned} \tag{31}$$

703

$$\mathbb{E} \|\bar{\omega}_{k+1} - \omega^*(\theta_k)\|^2 \leq (1 - 2\lambda_{\phi} \beta_k) \mathbb{E} \|\bar{\omega}_k - \omega^*(\theta_k)\|^2 + C_{\delta}^2 \beta_k^2. \tag{32}$$

704 *Proof.* We begin with the optimality gap of averaged critic variables

$$\begin{aligned} &\|\bar{\omega}_{k+1} - \omega^*(\theta_{k+1})\|^2 \\ &= \|\bar{\omega}_{k+1} - \omega^*(\theta_k) + \omega^*(\theta_k) - \omega^*(\theta_{k+1})\|^2 \\ &= \|\bar{\omega}_{k+1} - \omega^*(\theta_k)\|^2 + \|\omega^*(\theta_k) - \omega^*(\theta_{k+1})\|^2 + 2\langle \bar{\omega}_{k+1} - \omega^*(\theta_k), \omega^*(\theta_k) - \omega^*(\theta_{k+1}) \rangle \\ &\leq \|\bar{\omega}_{k+1} - \omega^*(\theta_k)\|^2 + N^2 L_{\omega}^2 C_{\theta}^2 \alpha_k^2 + 2\langle \bar{\omega}_{k+1} - \omega^*(\theta_k), \nabla \omega^*(\theta_k)^T (\theta_k - \theta_{k+1}) \rangle \\ &\quad + 2\langle \bar{\omega}_{k+1} - \omega^*(\theta_k), \omega^*(\theta_k) - \omega^*(\theta_{k+1}) - \nabla \omega^*(\theta_k)^T (\theta_k - \theta_{k+1}) \rangle, \end{aligned} \tag{33}$$

705 where the inequality is due to

$$\begin{aligned} \|\omega^*(\theta_k) - \omega^*(\theta_{k+1})\|^2 &\leq L_{\omega} \|\theta_k - \theta_{k+1}\|^2, \\ \|\theta_k - \theta_{k+1}\|^2 &= \left\| \sum_{i=1}^N \hat{\delta}(\xi_k, \omega_k^i, \lambda_k^i) \psi_{\theta_k^i}(s_k, a_k^i) \right\|^2 \leq N^2 \alpha_k^2 C_{\theta}^2, \end{aligned} \tag{34}$$

706 with  $C_{\theta} := C_{\delta} C_{\psi}$ .

707 The third term in (33) can be bounded as

$$\begin{aligned}
& \langle \bar{\omega}_{k+1} - \omega^*(\theta_k), \nabla \omega^*(\theta_k)^T (\theta_k - \theta_{k+1}) \rangle \\
& \leq \|\bar{\omega}_{k+1} - \omega^*(\theta_k)\| \|\nabla \omega^*(\theta_k)^T (\theta_k - \theta_{k+1})\| \\
& \leq L_{\omega,2} \|\bar{\omega}_{k+1} - \omega^*(\theta_k)\| \|\theta_k - \theta_{k+1}\| \\
& \leq \sum_{i=1}^N L_{\omega,2} \alpha_k \|\bar{\omega}_{k+1} - \omega^*(\theta_k)\| \|g_a^i(\xi_k, \omega_{k+1}^i, \lambda_{k+1}^i)\| \\
& \leq \sum_{i=1}^N (2L_{\omega,2} \alpha_k \|\bar{\omega}_{k+1} - \omega^*(\theta_k)\|^2 + \frac{\alpha_k}{8} \|g_a^i(\xi_k, \omega_{k+1}^i, \lambda_{k+1}^i)\|^2), \tag{35}
\end{aligned}$$

708 where the second inequality follows Proposition 1, the third inequality uses triangle inequality, and  
709 the last inequality uses Young's inequality.

710 The last term in (33) can be bounded as

$$\begin{aligned}
& \mathbb{E} \langle \bar{\omega}_{k+1} - \omega^*(\theta_k), \omega^*(\theta_k) - \omega^*(\theta_{k+1}) - \nabla \omega^*(\theta_k)^T (\theta_k - \theta_{k+1}) \rangle \\
& \leq \frac{L_{\omega,2}^2}{2} \mathbb{E} \|\bar{\omega}_{k+1} - \omega^*(\theta_k)\| \|\theta_{k+1} - \theta_k\|^2 \\
& \leq \frac{L_{\omega,2}^2}{4} \mathbb{E} \|\bar{\omega}_{k+1} - \omega^*(\theta_k)\|^2 \|\theta_{k+1} - \theta_k\|^2 + \frac{L_{\omega,2}^2}{4} \|\theta_{k+1} - \theta_k\|^2 \\
& \leq \frac{L_{\omega,2}^2}{4} N^2 C_\theta^2 \alpha_k^2 \mathbb{E} \|\bar{\omega}_{k+1} - \omega^*(\theta_k)\|^2 + \frac{L_{\omega,2}^2}{4} N^2 C_\theta^2 \alpha_k^2. \tag{36}
\end{aligned}$$

711 The first inequality uses Lemma 10, and the second inequality is induced by Young's inequality. The  
712 last inequality follows (34).

713 Plug (35) and (36) into (33) will yield (31).

714 We now prove (32).

$$\begin{aligned}
\|\bar{\omega}_{k+1} - \omega^*(\theta_k)\|^2 &= \left\| \prod_{R_\omega} (\bar{\omega}_k + \beta_k \bar{g}_c(\xi_k, \bar{\omega}_k)) - \prod_{R_\omega} \omega^*(\theta_k) \right\|^2 \\
&\leq \|\bar{\omega}_k + \beta_k \bar{g}_c(\xi_k, \bar{\omega}_k) - \omega^*(\theta_k)\|^2 \\
&= \|\bar{\omega}_k - \omega^*(\theta_k)\|^2 + \beta_k^2 \|\bar{g}_c(\xi_k, \bar{\omega}_k)\|^2 + 2\beta_k \mathbb{E}[\langle \bar{\omega}_k - \omega^*(\theta_k), \bar{g}_c(\xi_k, \bar{\omega}_k) \rangle] \\
&\leq \|\bar{\omega}_k - \omega^*(\theta_k)\|^2 + \beta_k^2 C_\delta^2 + 2\beta_k \langle \bar{\omega}_k - \omega^*(\theta_k), \bar{g}_c(\xi_k, \bar{\omega}_k) \rangle. \tag{37}
\end{aligned}$$

715 The first inequality is due to the non-expansiveness of projection to convex set. The last inequality  
716 follows

$$\|\bar{g}_c(\xi, \omega)\| \leq |r(s, a) + \gamma \phi(s')^T \omega - \phi(s)^T \omega| \leq r_{\max} + (1 + \gamma) R_\omega := C_\delta.$$

717 Let  $\xi \sim \mu_\theta$  to represent  $s \sim \mu_{\pi_\theta}$ ,  $a \sim \pi_\theta(\cdot|s)$ ,  $s' \sim \mathcal{P}(\cdot|s, a)$ , the last term in (37) can be bounded as

$$\begin{aligned}
& \mathbb{E}[\langle \bar{\omega}_k - \omega^*(\theta_k), \bar{g}_c(\xi_k, \bar{\omega}_k) \rangle] \\
&= \langle \bar{\omega}_k - \omega^*(\theta_k), \mathbb{E}[\bar{g}_c(\xi_k, \bar{\omega}_k) - g_c(\theta_k, \omega^*(\theta_k))] \rangle \\
&= \beta_k \langle \bar{\omega}_k - \omega^*(\theta_k), \mathbb{E}_{\xi \sim \mu_{\theta_k}}[\phi(s)(\gamma \phi(s') - \phi(s))^T | \theta_k] (\bar{\omega}_k - \omega^*(\theta_k)) \rangle \\
&= \beta_k \langle \bar{\omega}_k - \omega^*(\theta_k), A_{\theta_k, \phi} (\bar{\omega}_k - \omega^*(\theta_k)) \rangle \\
&\leq -\lambda_\phi \beta_k \|\bar{\omega}_k - \omega^*(\theta_k)\|^2. \tag{38}
\end{aligned}$$

718 Here the first equality is due to critic's optimality condition  $g_c(\theta_k, \omega^*(\theta_k)) =$   
719  $\mathbb{E}_{\xi_k \sim \mu_{\theta_k}}[\bar{g}_c(\xi_k, \omega^*(\theta_k)) | \theta_k] = 0$ . The last inequality uses the negative definiteness of  $A_{\theta_k, \phi}$ .  
720 Plug (38) into (37) gives us (36).  $\square$

721 The next lemma describes the descent property of averaged critic variables under Markovian sampling.

722 **Lemma 16** (descent of critic's optimal gap (Markovian sampling)). *Under Assumptions 1-4, with*  
 723  $\omega_{k+1}$  *generated by Algorithm 1 given*  $\omega_k$  *and*  $\theta_k$  *under Markovian sampling, then the following holds*

$$\begin{aligned} \mathbb{E}\|\bar{\omega}_{k+1} - \omega^*(\theta_{k+1})\|^2 &\leq (1 + 4L_{\omega,2}^2 N \alpha_k + \frac{L_{\omega,2}^2 C_\theta^2 N^2 \alpha_k^2}{2}) \mathbb{E}\|\bar{\omega}_{k+1} - \omega^*(\theta_k)\|^2 \\ &\quad + (\frac{L_{\omega,2}^2 C_\theta^2 N^2}{2} + L_\omega^2 C_\theta^2 N^2) \alpha_k^2 + \frac{\alpha_k}{4} \sum_{i=1}^N \|\mathbb{E}[g_a^i(\xi_k, \omega_{k+1}^i, \lambda_{k+1}^i)]\|^2. \end{aligned} \quad (39)$$

724

$$\mathbb{E}\|\bar{\omega}_{k+1} - \omega^*(\theta_k)\|^2 \leq (1 - 2\lambda_\phi \beta_k) \mathbb{E}\|\bar{\omega}_k - \omega^*(\theta_k)\|^2 + C_{K_1} \beta_k \beta_{k-Z_K} + C_{K_2} \alpha_{k-Z_K} \beta_k. \quad (40)$$

725 where  $C_{K_1} := 4C_2 C_\delta Z_K + C_\delta^2$ ,  $C_{K_2} := 4C_1 C_\theta Z_K + 2C_3 C_\theta Z_K^2 + C_8$ ,  $Z_K := \min\{z \in$   
 726  $\mathbb{N}^+ | \kappa \rho^{z-1} \leq \min\{\alpha_k, \beta_k, \eta_k\}\}$ .

727 *Proof.* (39) has already been derived in the proof of i.i.d. sampling setting, please check the derivation  
 728 of (31).

729 We now prove (40). Follow the derivation of (37), we have

$$\begin{aligned} \mathbb{E}\|\bar{\omega}_{k+1} - \omega^*(\theta_k)\|^2 &\leq \|\bar{\omega}_k - \omega^*(\theta_k)\|^2 + \beta_k^2 C_\delta^2 + 2\beta_k \mathbb{E}\langle \bar{\omega}_k - \omega^*(\theta_k), \bar{g}_c(\xi_k, \bar{\omega}_k) \rangle \\ &= \|\bar{\omega}_k - \omega^*(\theta_k)\|^2 + \beta_k^2 C_\delta^2 + 2\beta_k \mathbb{E}\langle \bar{\omega}_k - \omega^*(\theta_k), g_c(\theta_k, \bar{\omega}_k) \rangle \\ &\quad + 2\beta_k \mathbb{E}\langle \bar{\omega}_k - \omega^*(\theta_k), \bar{g}_c(\xi_k, \bar{\omega}_k) - g_c(\theta_k, \bar{\omega}_k) \rangle \\ &\leq (1 - 2\lambda_\phi \beta_k) \|\bar{\omega}_k - \omega^*(\theta_k)\|^2 + \beta_k^2 C_\delta^2 \\ &\quad + 2\beta_k \mathbb{E}\langle \bar{\omega}_k - \omega^*(\theta_k), \bar{g}_c(\xi_k, \bar{\omega}_k) - g_c(\theta_k, \bar{\omega}_k) \rangle. \end{aligned} \quad (41)$$

730 Here, the last inequality bound the third term using the same technique of (38).

731 We now bound the last term in (41). By Lemma 17, for any  $z \in \mathbb{N}^+$ , we have

$$\begin{aligned} &\mathbb{E}\langle \bar{\omega}_k - \omega^*(\theta_k), \bar{g}_c(\xi_k, \bar{\omega}_k) - g_c(\theta_k, \bar{\omega}_k) \rangle \\ &\leq C_1 \mathbb{E}\|\theta_k - \theta_{k-z}\| + C_2 \mathbb{E}\|\bar{\omega}_k - \bar{\omega}_{k-z}\| + C_3 \sum_{m=0}^{z-1} \mathbb{E}\|\theta_{k-m} - \theta_{k-z}\| + C_8 \kappa \rho^{z-1} \\ &\stackrel{(i)}{\leq} C_1 \sum_{n=1}^z \mathbb{E}\|\theta_{k-n+1} - \theta_{k-n}\| + C_2 \sum_{n=1}^z \mathbb{E}\|\bar{\omega}_{k-n+1} - \bar{\omega}_{k-n}\| \\ &\quad + C_3 \sum_{m=0}^{z-1} \sum_{n=1}^{z-m} \mathbb{E}\|\theta_{k-m-n+1} - \theta_{k-m-n}\| + C_8 \kappa \rho^{z-1} \\ &\leq 2C_1 C_\theta \sum_{n=1}^z \alpha_{k-n} + 2C_2 C_\delta \sum_{n=1}^z \beta_{k-n} + C_3 C_\theta \sum_{m=0}^{z-1} \sum_{n=1}^{z-m} \alpha_{k-m-n} + C_8 \kappa \rho^{z-1} \\ &\stackrel{(ii)}{\leq} 2C_1 C_\theta z \alpha_{k-z} + 2C_2 C_\delta z \beta_{k-z} + C_3 C_\theta z(z-1) \alpha_{k-z} + C_8 \kappa \rho^{z-1}, \end{aligned} \quad (42)$$

732 where the (i) uses triangle inequality, (ii) uses the non-increasing property of step sizes.

733 Let  $z = Z_K := \min\{z \in \mathbb{N}^+ | \kappa \rho^{z-1} \leq \min\{\alpha_k, \beta_k, \eta_k\}\}$ , we have

$$\begin{aligned} &\mathbb{E}\langle \bar{\omega}_k - \omega^*(\theta_k), \bar{g}_c(\xi_k, \bar{\omega}_k) - g_c(\theta_k, \bar{\omega}_k) \rangle \\ &\leq 2C_1 C_\theta Z_K \alpha_{k-Z_K} + 2C_2 C_\delta Z_K \beta_{k-Z_K} + C_3 C_\theta Z_K^2 \alpha_{k-Z_K} + C_8 \alpha_{k-Z_K}. \end{aligned} \quad (43)$$

734 Plug (43) into (41) will yield

$$\begin{aligned} \|\bar{\omega}_{k+1} - \omega^*(\theta_k)\|^2 &\leq (1 - 2\lambda_\phi \beta_k) \|\bar{\omega}_k - \omega^*(\theta_k)\|^2 + C_\delta^2 \beta_k^2 \\ &\quad + 4C_1 C_\theta Z_K \alpha_{k-Z_K} + 4C_2 C_\delta Z_K \beta_{k-Z_K} + 2C_3 C_\theta Z_K^2 \alpha_{k-Z_K} + 2C_8 \alpha_{k-Z_K}. \end{aligned}$$

735 By defining  $C_{K_1} := 4C_2 C_\delta Z_K + C_\delta^2$ ,  $C_{K_2} := 4C_1 C_\theta Z_K + 2C_3 C_\theta Z_K^2 + C_8$ , we complete the  
 736 proof.  $\square$



737 **Lemma 17.** Consider the sequence generated by Algorithm 1, for any  $z \in \mathbb{N}^+$ , we have

$$\begin{aligned} \mathbb{E}\langle \bar{\omega}_k - \omega^*(\theta_k), \bar{g}_c(\xi_k, \bar{\omega}_k) - g_c(\theta_k, \bar{\omega}_k) \rangle &\leq C_1 \|\theta_k - \theta_{k-z}\| + C_2 \|\bar{\omega}_k - \bar{\omega}_{k-z}\| \\ &+ C_3 \sum_{m=0}^{z-1} \|\theta_{k-m} - \theta_{k-z}\| + C_8 \kappa \rho^{z-1}, \end{aligned}$$

738 where  $C_1 := 4R_\omega C_\delta |\mathcal{A}| L_\pi (1 + \log_\rho \kappa^{-1} + (1 - \rho)^{-1}) + 2C_\delta L_\omega$ ,  $C_2 := 4(1 + \gamma)R_\omega + 2C_\delta$ ,  $C_3 :=$   
739  $4R_\omega C_\delta |\mathcal{A}| L_\pi$ ,  $C_8 := 8R_\omega C_\delta$ .

740 *Proof.* Consider the Markov chain since timestep  $k - z$ :

$$s_{k-z} \xrightarrow{\theta_{k-z}} a_{k-z} \xrightarrow{\mathcal{P}} s_{k-z+1} \xrightarrow{\theta_{k-z+1}} a_{k-z+1} \cdots \xrightarrow{\theta_{k-1}} a_{k-1} \xrightarrow{\mathcal{P}} s_k \xrightarrow{\theta_k} a_k \xrightarrow{\mathcal{P}} s_{k+1}.$$

741 Also consider the auxiliary Markov chain with fixed policy since timestep  $k - z$ :

$$s_{k-z} \xrightarrow{\theta_{k-z}} a_{k-z} \xrightarrow{\mathcal{P}} s_{k-z+1} \xrightarrow{\theta_{k-z}} \tilde{a}_{k-z+1} \cdots \xrightarrow{\theta_{k-z}} \tilde{a}_{k-1} \xrightarrow{\mathcal{P}} \tilde{s}_k \xrightarrow{\theta_{k-z}} \tilde{a}_k \xrightarrow{\mathcal{P}} \tilde{s}_{k+1}.$$

742 Throughout the proof of this lemma, we will use  $\theta, \theta', \bar{\omega}, \bar{\omega}', \xi, \tilde{\xi}$  as shorthand notations of

743  $\theta_k, \theta_{k-z}, \bar{\omega}_k, \bar{\omega}_{k-z}, \xi_k, \tilde{\xi}_k$ .

744 For the ease of expression, define

$$\Delta_1(\xi, \theta, \omega) := \langle \omega - \omega^*(\theta), \bar{g}_c(\xi, \omega) - g_c(\theta, \omega) \rangle.$$

745 Therefore, we have

$$\begin{aligned} \langle \bar{\omega}_k - \omega^*(\theta_k), \bar{g}_c(\xi_k, \bar{\omega}_k) - g_c(\theta_k, \bar{\omega}_k) \rangle &= \Delta_1(\xi, \theta, \bar{\omega}) \\ &= \underbrace{\Delta_1(\xi, \theta, \bar{\omega}) - \Delta_1(\xi, \theta', \bar{\omega})}_{I_1} + \underbrace{\Delta_1(\xi, \theta', \bar{\omega}) - \Delta_1(\xi, \theta', \bar{\omega}')}_{I_2} \\ &+ \underbrace{\Delta_1(\xi, \theta', \bar{\omega}') - \Delta_1(\tilde{\xi}, \theta', \bar{\omega}')}_{I_3} + \underbrace{\Delta_1(\tilde{\xi}, \theta', \bar{\omega}')}_{I_4}. \quad (44) \end{aligned}$$

746  $I_1$  can be expressed as

$$\begin{aligned} I_1 &= \langle \bar{\omega} - \omega^*(\theta), \bar{g}_c(\xi, \bar{\omega}) - g_c(\theta, \bar{\omega}) \rangle - \langle \bar{\omega} - \omega^*(\theta'), \bar{g}_c(\xi, \bar{\omega}) - g_c(\theta', \bar{\omega}) \rangle \\ &= \langle \bar{\omega} - \omega^*(\theta), \bar{g}_c(\xi, \bar{\omega}) - g_c(\theta, \bar{\omega}) \rangle - \langle \bar{\omega} - \omega^*(\theta), \bar{g}_c(\xi, \bar{\omega}) - g_c(\theta', \bar{\omega}) \rangle \\ &\quad + \langle \omega^*(\theta) - \omega^*(\theta'), \bar{g}_c(\xi, \bar{\omega}) - g_c(\theta', \bar{\omega}) \rangle \\ &\leq \|\bar{\omega} - \omega^*(\theta)\| \|g_c(\theta', \bar{\omega}) - g_c(\theta, \bar{\omega})\| + \|\omega^*(\theta) - \omega^*(\theta')\| \|\bar{g}_c(\xi, \bar{\omega}) - g_c(\theta', \bar{\omega})\|. \quad (45) \end{aligned}$$

747 The first term can be bounded as

$$\begin{aligned} \|\bar{\omega} - \omega^*(\theta)\| \|g_c(\theta', \bar{\omega}) - g_c(\theta, \bar{\omega})\| &\leq 2R_\omega \|\mathbb{E}_{\xi \sim \mu'_\theta} [\bar{g}_c(\xi, \bar{\omega})] - \mathbb{E}_{\xi \sim \mu_\theta} [\bar{g}_c(\xi, \bar{\omega})]\| \\ &\leq 4R_\omega \sup_{\xi} \|\bar{g}_c(\xi, \bar{\omega})\| d_{TV}(\mu'_\theta \otimes \pi'_\theta \otimes \mathcal{P}, \mu_\theta \otimes \pi_\theta \otimes \mathcal{P}) \\ &\leq 4R_\omega C_\delta d_{TV}(\mu'_\theta \otimes \pi'_\theta \otimes \mathcal{P}, \mu_\theta \otimes \pi_\theta \otimes \mathcal{P}) \\ &\leq 4R_\omega C_\delta |\mathcal{A}| L_\pi (1 + \log_\rho \kappa^{-1} + (1 - \rho)^{-1}) \|\theta - \theta'\|, \quad (46) \end{aligned}$$

748 where the first inequality follows the projection update of each critic step, the third inequality is due  
749 to  $\|\bar{g}_c(\xi, \bar{\omega})\| \leq C_\delta$ , and the last inequality follows Lemma 8.

750 By the Lipschitz continuous of  $\omega^*(\theta)$  proposed in Proposition 1, the second term can be bounded as

$$\|\omega^*(\theta) - \omega^*(\theta')\| \|\bar{g}_c(\xi, \bar{\omega}) - g_c(\theta, \bar{\omega})\| \leq 2C_\delta L_\omega \|\theta - \theta'\| \quad (47)$$

751 Plug (46) and (47) into (45), we can bound  $I_1$  as

$$I_1 \leq (4R_\omega C_\delta |\mathcal{A}| L_\pi (1 + \log_\rho \kappa^{-1} + (1 - \rho)^{-1}) + 2C_\delta L_\omega) \|\theta - \theta'\|. \quad (48)$$

752 Next we bound  $I_2$  as

$$\begin{aligned} I_2 &= \langle \bar{\omega} - \omega^*(\theta'), \bar{g}_c(\xi, \bar{\omega}) - g_c(\theta', \bar{\omega}) \rangle - \langle \bar{\omega}' - \omega^*(\theta'), \bar{g}_c(\xi, \bar{\omega}') - g_c(\theta', \bar{\omega}') \rangle \\ &= \langle \bar{\omega} - \omega^*(\theta'), \bar{g}_c(\xi, \bar{\omega}) - g_c(\theta', \bar{\omega}) \rangle - \langle \bar{\omega}' - \omega^*(\theta'), \bar{g}_c(\xi, \bar{\omega}') - g_c(\theta', \bar{\omega}') \rangle \\ &\quad + \langle \bar{\omega}' - \omega^*(\theta'), \bar{g}_c(\xi, \bar{\omega}) - \bar{g}_c(\xi, \bar{\omega}') - g_c(\theta', \bar{\omega}) + g_c(\theta', \bar{\omega}') \rangle. \end{aligned}$$

753 The first two terms can be bounded as

$$\langle \bar{\omega} - \bar{\omega}', \bar{g}_c(\xi, \bar{\omega}) - g_c(\theta', \bar{\omega}) \rangle \leq 2C_\delta \|\bar{\omega} - \bar{\omega}'\|. \quad (49)$$

754 The last term can be bounded as

$$\begin{aligned} &\langle \bar{\omega}' - \omega^*(\theta'), \bar{g}_c(\xi, \bar{\omega}) - \bar{g}_c(\xi, \bar{\omega}') - g_c(\theta', \bar{\omega}) + g_c(\theta', \bar{\omega}') \rangle \\ &\leq \|\bar{\omega} - \omega^*(\theta')\| (\|\bar{g}_c(\xi, \bar{\omega}) - \bar{g}_c(\xi, \bar{\omega}')\| + \|g_c(\theta', \bar{\omega}') - g_c(\theta', \bar{\omega})\|) \\ &\leq 2R_\omega (\|\bar{g}_c(\xi, \bar{\omega}) - \bar{g}_c(\xi, \bar{\omega}')\| + \|g_c(\theta', \bar{\omega}') - g_c(\theta', \bar{\omega})\|) \\ &\leq 4R_\omega (1 + \gamma) \|\bar{\omega} - \bar{\omega}'\|, \end{aligned} \quad (50)$$

755 where the second inequality follows the projection of each critic step. The last inequality is due to

$$\begin{aligned} \|\bar{g}_c(\xi, \bar{\omega}) - \bar{g}_c(\xi, \bar{\omega}')\| &= \|\phi(s)(\gamma\phi(s')^T(\bar{\omega} - \bar{\omega}') - \phi(s)^T(\bar{\omega} - \bar{\omega}'))\| \\ &\leq \gamma\|\phi(s')^T(\bar{\omega} - \bar{\omega}')\| + \|\phi(s)^T(\bar{\omega} - \bar{\omega}')\| \\ &\leq (1 + \gamma)\|\bar{\omega} - \bar{\omega}'\|. \end{aligned}$$

756 Combine (49) and (50), we can bound  $I_2$  as

$$I_2 \leq (4(1 + \gamma)R_\omega + 2C_\delta)\|\bar{\omega} - \bar{\omega}'\|. \quad (51)$$

757 We bound  $I_3$  as

$$\begin{aligned} \mathbb{E}[I_3|\theta', s_{k-z+1}] &= \mathbb{E}[\Delta_1(\xi, \theta', \bar{\omega}') - \Delta_1(\tilde{\xi}, \theta', \bar{\omega}')|\theta', s_{k-z+1}] \\ &\leq 2 \sup_{\xi} |\Delta_1(\xi, \theta', \bar{\omega}')| d_{TV}(\mathbb{P}(\xi \in \cdot|\theta', s_{k-z+1}), \mathbb{P}(\tilde{\xi} \in \cdot|\theta', s_{k-z+1})) \\ &\leq 8R_\omega C_\delta d_{TV}(\mathbb{P}(\xi \in \cdot|\theta', s_{k-z+1}), \mathbb{P}(\tilde{\xi} \in \cdot|\theta', s_{k-z+1})) \\ &\leq 4R_\omega C_\delta |\mathcal{A}| L_\pi \sum_{m=0}^{z-1} \|\theta_{k-m} - \theta_{k-z}\|. \end{aligned} \quad (52)$$

758 Here, the second inequality is due to  $\|\Delta_1(\xi, \theta', \bar{\omega}')\| \leq \|\omega' - \omega^*(\theta')\| \|\bar{g}_c(\xi, \omega') - g_c(\theta', \omega')\| \leq$   
759  $4R_\omega C_\delta$ , and the last inequality is according to Lemma 13.

760 We now bound  $I_4$

$$\begin{aligned} \mathbb{E}[I_4|\theta', \bar{\omega}', s_{k+z-1}] &= \mathbb{E}[\Delta_1(\tilde{\xi}, \theta', \bar{\omega}')|\theta', \bar{\omega}', s_{k+z-1}] \\ &\leq \sup_{\xi} |\Delta_1(\xi, \theta', \bar{\omega}')| \|\mathbb{P}(\xi \in \cdot|\theta', s_{k-z+1}) - \mu_{\theta'} \otimes \pi_{\theta'} \otimes \mathcal{P}\| \\ &\leq 8R_\omega C_\delta d_{TV}(\mathbb{P}(\tilde{x} \in \cdot|\theta', s_{k-z+1}), \mu_{\theta'} \otimes \pi_{\theta'} \otimes \mathcal{P}) \\ &\leq 8R_\omega C_\delta \kappa \rho^{z-1}, \end{aligned} \quad (53)$$

761 where the last inequality follows Lemma 5.

762 Plug (48), (51), (52), and (53) into (44), we get

$$\begin{aligned} \mathbb{E}[\Delta_1(\xi, \theta, \bar{\omega})] &\leq (4R_\omega C_\delta |\mathcal{A}| L_\pi (1 + \log_\rho \kappa^{-1} + (1 - \rho)^{-1}) + 2C_\delta L_\omega) \mathbb{E}\|\theta_k - \theta_{k-z}\| \\ &\quad + (4(1 + \gamma)R_\omega + 2C_\delta) \mathbb{E}\|\bar{\omega}_k - \bar{\omega}_{k-z}\| \\ &\quad + (4R_\omega C_\delta |\mathcal{A}| L_\pi) \sum_{m=0}^{z-1} \mathbb{E}\|\theta_{k-m} - \theta_{k-z}\| \\ &\quad + (8R_\omega C_\delta) \kappa \rho^{z-1}, \end{aligned}$$

763 which completes the proof.  $\square$

764 **D.2 Error of reward estimator**

765 The analysis for the error of reward estimator is similar to critic. To see this, we only need to change  
 766  $\bar{g}_c(\xi, \bar{\omega})$  into  $\bar{g}_r(\xi, \bar{\lambda}) := (r(s, a) - \varphi(s, a)^T \bar{\lambda}) \varphi(s, a)$  to recover most of the proofs. We provide the  
 767 reward estimator's analysis for the completeness. For the ease of discussion, we define

$$\begin{aligned} g_r^i(\xi, \lambda) &:= \varphi(s, a)(r^i(s, a) - \varphi(s, a)^T \lambda), \\ \bar{g}_r(\xi, \lambda) &:= \varphi(s, a)(\bar{r}(s, a) - \varphi(s, a)^T \lambda), \\ g_r(\theta, \lambda) &:= \mathbb{E}_{\xi \sim \mu_\theta}[\bar{g}_r(\xi, \lambda)]. \end{aligned}$$

768 Note here  $g_r^i(\xi, \lambda)$  and  $\bar{g}_r(\xi, \lambda)$  do not depend on the next state  $s'$ . We use  $\xi$  for notational convenience.

769 The following lemma is the counter part of Lemma 15 for reward estimator.

770 **Lemma 18** (descent of reward estimator's optimal gap (i.i.d. sampling)). *Suppose Assumptions 1-4*  
 771 *hold, with  $\lambda_{k+1}$  generated by Algorithm 1 given  $\lambda_k$  and  $\theta_k$  under i.i.d. sampling, then the following*  
 772 *holds*

$$\begin{aligned} \mathbb{E}\|\bar{\lambda}_{k+1} - \lambda^*(\theta_{k+1})\|^2 &\leq (1 + 4L_{\lambda,2}^2 N \alpha_k + \frac{L_{\lambda,2}^2}{2} C_\theta^2 N^2 \alpha_k^2) \mathbb{E}\|\bar{\lambda}_{k+1} - \lambda^*(\theta_k)\|^2 \\ &\quad + (\frac{L_{\lambda,2}^2}{2} C_\theta^2 N^2 + L_\lambda^2 C_\theta^2 N^2) \alpha_k^2 + \frac{\alpha_k}{4} \sum_{i=1}^N \|\mathbb{E}[g_a^i(\xi_k, \lambda_{k+1}^i, \lambda_{k+1}^i)]\|^2. \end{aligned} \quad (54)$$

773

$$\mathbb{E}\|\bar{\lambda}_{k+1} - \lambda^*(\theta_k)\|^2 \leq (1 - 2\eta_k \lambda_\varphi) \|\bar{\lambda}_k - \lambda^*(\theta_k)\|^2 + \eta_k^2 C_\lambda^2. \quad (55)$$

774 *Proof.* We begin with the optimal gap

$$\begin{aligned} &\|\bar{\lambda}_{k+1} - \lambda^*(\theta_{k+1})\|^2 \\ &= \|\bar{\lambda}_{k+1} - \lambda^*(\theta_k) + \lambda^*(\theta_k) - \lambda^*(\theta_{k+1})\|^2 \\ &= \|\bar{\lambda}_{k+1} - \lambda^*(\theta_k)\|^2 + \|\lambda^*(\theta_k) - \lambda^*(\theta_{k+1})\|^2 + 2\langle \bar{\lambda}_{k+1} - \lambda^*(\theta_k), \lambda^*(\theta_k) - \lambda^*(\theta_{k+1}) \rangle \\ &\leq \|\bar{\lambda}_{k+1} - \lambda^*(\theta_k)\|^2 + N^2 L_\lambda^2 C_\theta^2 \alpha_k^2 + 2\langle \bar{\lambda}_{k+1} - \lambda^*(\theta_k), \nabla \lambda^*(\theta_k)^T (\theta_k - \theta_{k+1}) \rangle \\ &\quad + 2\langle \bar{\lambda}_{k+1} - \lambda^*(\theta_k), \lambda^*(\theta_k) - \lambda^*(\theta_{k+1}) - \nabla \lambda^*(\theta_k)^T (\theta_k - \theta_{k+1}) \rangle \\ &\leq \|\bar{\lambda}_{k+1} - \lambda^*(\theta_k)\|^2 + N^2 L_\lambda^2 C_\theta^2 \alpha_k^2 + 2\alpha_k L_{\lambda,2} \sum_{i=1}^N \mathbb{E}\|\bar{\lambda}_{k+1} - \lambda^*(\theta_k)\| \|\mathbb{E}[g_a^i(\xi_k, \omega_{k+1}^i, \lambda_{k+1}^i)]\| \\ &\quad + 2\langle \bar{\lambda}_{k+1} - \lambda^*(\theta_k), \lambda^*(\theta_k) - \lambda^*(\theta_{k+1}) - \nabla \lambda^*(\theta_k)^T (\theta_k - \theta_{k+1}) \rangle \\ &\leq \|\bar{\lambda}_{k+1} - \lambda^*(\theta_k)\|^2 + N^2 L_\lambda^2 C_\theta^2 \alpha_k^2 + 4\alpha_k N L_{\lambda,2} \mathbb{E}\|\bar{\lambda}_{k+1} - \lambda^*(\theta_k)\|^2 + \frac{\alpha_k}{4} \sum_{i=1}^N \|\mathbb{E}[g_a^i(\xi_k, \omega_{k+1}^i, \lambda_{k+1}^i)]\|^2 \\ &\quad + 2\langle \bar{\lambda}_{k+1} - \lambda^*(\theta_k), \lambda^*(\theta_k) - \lambda^*(\theta_{k+1}) - \nabla \lambda^*(\theta_k)^T (\theta_k - \theta_{k+1}) \rangle. \end{aligned} \quad (56)$$

775 where the first inequality uses the Lipschitz continuous of  $\lambda^*(\theta)$  and  $\|\theta_k - \theta_{k+1}\|^2 \leq N^2 \alpha_k^2 C_\theta^2$ . The  
 776 second inequality uses triangle inequality and the Lemma 2. The last inequality is due to Young's  
 777 inequality.

778 The last term in (56) can be bounded as

$$\begin{aligned} &\mathbb{E}\langle \bar{\lambda}_{k+1} - \lambda^*(\theta_k), \lambda^*(\theta_k) - \lambda^*(\theta_{k+1}) - \nabla \lambda^*(\theta_k)^T (\theta_k - \theta_{k+1}) \rangle \\ &\leq \frac{L_{\lambda,2}^2}{2} \mathbb{E}\|\bar{\lambda}_{k+1} - \lambda^*(\theta_k)\| \|\theta_{k+1} - \theta_k\|^2 \\ &\leq \frac{L_{\lambda,2}^2}{4} \mathbb{E}\|\bar{\lambda}_{k+1} - \lambda^*(\theta_k)\|^2 \|\theta_{k+1} - \theta_k\|^2 + \frac{L_{\lambda,2}^2}{4} \|\theta_{k+1} - \theta_k\|^2 \\ &\leq \frac{L_{\lambda,2}^2}{4} N^2 C_\theta^2 \alpha_k^2 \mathbb{E}\|\bar{\lambda}_{k+1} - \lambda^*(\theta_k)\|^2 + \frac{L_{\lambda,2}^2}{4} N^2 C_\theta^2 \alpha_k^2. \end{aligned} \quad (57)$$

779 The first inequality uses Lemma 10, and the second inequality is induced by Young's inequality. Plug  
780 (57) into (56) will yield (54).

781 We now prove (55)

$$\begin{aligned}
\|\bar{\lambda}_{k+1} - \lambda^*(\theta_k)\|^2 &= \left\| \prod_{R_\lambda} (\bar{\lambda}_k - \eta_k \bar{g}_r(\xi_k, \bar{\lambda}_k)) - \prod_{R_\lambda} \lambda^*(\theta_k) \right\|^2 \\
&\leq \|\bar{\lambda}_k - \eta_k \bar{g}_r(\xi_k, \bar{\lambda}_k) - \lambda^*(\theta_k)\|^2 \\
&\leq \|\bar{\lambda}_k - \lambda^*(\theta_k)\|^2 + \eta_k^2 \|\bar{g}_r(\xi_k, \bar{\lambda}_k)\|^2 + 2\eta_k \mathbb{E}[\langle \bar{\lambda}_k - \lambda^*(\theta_k), \bar{g}_r(\xi_k, \bar{\lambda}_k) \rangle] \\
&\leq \|\bar{\lambda}_k - \lambda^*(\theta_k)\|^2 + C_\lambda \eta_k^2 - 2\eta_k \mathbb{E}[\langle \bar{\lambda}_k + \lambda^*(\theta_k), \bar{g}_r(s_k, a_k, \bar{\lambda}_k) \rangle], \quad (58)
\end{aligned}$$

782 where the last inequality is due to  $\|\bar{g}_r(\xi_k, \bar{\lambda}_k)\| \leq |r(s, a) - \varphi(s, a)^T \lambda| \leq r_{\max} + R_\lambda := C_\lambda$ .

783 The last term can be bounded as

$$\begin{aligned}
\mathbb{E}[\langle \bar{\lambda}_k - \lambda^*(\theta_k), \bar{g}_r(\xi_k, \bar{\lambda}_k) \rangle] &= \langle \bar{\lambda}_k - \lambda^*(\theta_k), \mathbb{E}[\bar{g}_r(\xi_k, \bar{\lambda}_k) - g_r(\theta_k, \lambda^*(\theta_k))] \rangle \\
&= \langle \bar{\lambda}_k - \lambda^*(\theta_k), \mathbb{E}_{\xi \sim \mu_{\theta_k}}[\varphi(s_k, a_k) \varphi(s_k, a_k)^T | \bar{\lambda}_k] (\lambda^*(\theta_k) - \bar{\lambda}_k) \rangle \\
&= \langle \bar{\lambda}_k - \lambda^*(\theta_k), A_{\theta, \varphi} (\lambda^*(\theta_k) - \bar{\lambda}_k) \rangle \\
&\leq -\lambda_\varphi \|\bar{\lambda}_k - \lambda^*(\theta_k)\|^2, \quad (59)
\end{aligned}$$

784 where the first equality is according to the optimality condition of reward estimator

$$\mathbb{E}_{\xi \sim \mu_{\theta_k}}[\varphi(s, a)(r(s, a) - \varphi(s, a)^T \lambda^*(\theta_k))] = 0.$$

785 Plug (59) into (58) will give us (55), which completes the proof.  $\square$

786 **Lemma 19** (descent of reward estimator's optimal gap (Markovian sampling)). *Suppose Assumptions*  
787 *1-4 hold, with  $\lambda_{k+1}$  generated by Algorithm 1 given  $\lambda_k$  and  $\theta_k$  under Markovian sampling, then the*  
788 *following holds*

$$\begin{aligned}
\mathbb{E}\|\bar{\lambda}_{k+1} - \lambda^*(\theta_{k+1})\|^2 &\leq (1 + 4L_{\lambda, 2}^2 N \alpha_k + \frac{L_{\lambda, 2}^2}{2} C_\theta^2 N^2 \alpha_k^2) \mathbb{E}\|\bar{\lambda}_{k+1} - \lambda^*(\theta_k)\|^2 \\
&\quad + (\frac{L_{\lambda, 2}^2}{2} C_\theta^2 N^2 + L_\lambda^2 C_\theta^2 N^2) \alpha_k^2 + \frac{\alpha_k}{4} \sum_{i=1}^N \|\mathbb{E}[g_a^i(\xi_k, \lambda_{k+1}^i, \lambda_{k+1}^i)]\|^2. \quad (60)
\end{aligned}$$

789

$$\mathbb{E}\|\bar{\lambda}_{k+1} - \lambda^*(\theta_k)\|^2 \leq (1 - 2\eta_k \lambda_\varphi) \|\bar{\lambda}_k - \lambda^*(\theta_k)\|^2 + C_{K_3} \eta_k \eta_{k-Z_K} + C_{K_4} \eta_k \alpha_{k-Z_K}, \quad (61)$$

790 where  $C_{K_3} := 4C_6 C_\lambda Z_K + C_\lambda^2$ ,  $C_{K_4} := 4C_5 C_\theta Z_K + 2C_7 C_\theta Z_K^2 + C_8$ ,  $Z_K := \min\{z \in$   
791  $\mathbb{N}^+ | \kappa \rho^{z-1} \leq \min\{\alpha_k, \eta_k, \eta_k\}\}$ .

792 *Proof.* Since analysis of (60) does not involve the update of  $\bar{\lambda}_k$ , it can be directly recovered from  
793 (54).

794 We now prove (61). Following the derivation of (58), we obtain

$$\begin{aligned}
\|\bar{\lambda}_{k+1} - \lambda^*(\theta_k)\|^2 &\leq \|\bar{\lambda}_k - \lambda^*(\theta_k)\|^2 + C_\lambda^2 \eta_k^2 + 2\eta_k \mathbb{E}[\langle \bar{\lambda}_k - \lambda^*(\theta_k), \bar{g}_r(\xi_k, \bar{\lambda}_k) \rangle] \\
&= \|\bar{\lambda}_k - \lambda^*(\theta_k)\|^2 + C_\lambda^2 \eta_k^2 + 2\eta_k \mathbb{E}[\langle \bar{\lambda}_k - \lambda^*(\theta_k), g_r(\theta_k, \bar{\lambda}_k) \rangle] \\
&\quad + 2\eta_k \mathbb{E}[\langle \bar{\lambda}_k - \lambda^*(\theta_k), \bar{g}_r(\xi_k, \bar{\lambda}_k) - g_r(\theta_k, \bar{\lambda}_k) \rangle] \\
&\leq (1 - 2\lambda_\varphi \eta_k) \|\bar{\lambda}_k - \lambda^*(\theta_k)\|^2 + C_\lambda^2 \eta_k^2 \\
&\quad + 2\eta_k \mathbb{E}[\langle \bar{\lambda}_k - \lambda^*(\theta_k), \bar{g}_r(\xi_k, \bar{\lambda}_k) - g_r(\theta_k, \bar{\lambda}_k) \rangle], \quad (62)
\end{aligned}$$

795 where the last inequality is obtained by (61).

796 We now bound the last term. By Lemma 20, for any  $z \in \mathbb{N}^+$ , we have

$$\begin{aligned}
& \mathbb{E}\langle \bar{\lambda}_k - \lambda^*(\theta_k), \bar{g}_r(\xi_k, \bar{\lambda}_k) - g_r(\theta_k, \bar{\lambda}_k) \rangle \\
& \leq C_5 \mathbb{E}\|\theta_k - \theta_{k-z}\| + C_6 \mathbb{E}\|\bar{\lambda}_k - \bar{\lambda}_{k-z}\| + C_7 \sum_{m=0}^{z-1} \mathbb{E}\|\theta_{k-m} - \theta_{k-z}\| + C_8 \kappa \rho^{z-1} \\
& \stackrel{(i)}{\leq} C_5 \sum_{n=1}^z \mathbb{E}\|\theta_{k-n+1} - \theta_{k-n}\| + C_6 \sum_{n=1}^z \mathbb{E}\|\bar{\lambda}_{k-n+1} - \bar{\lambda}_{k-n}\| \\
& \quad + C_7 \sum_{m=0}^{z-1} \sum_{n=1}^{z-m} \mathbb{E}\|\theta_{k-m-n+1} - \theta_{k-m-n}\| + C_8 \kappa \rho^{z-1} \\
& \leq 2C_5 C_\theta \sum_{n=1}^z \alpha_{k-n} + 2C_6 C_\lambda \sum_{n=1}^z \eta_{k-n} + C_7 C_\theta \sum_{m=0}^{z-1} \sum_{n=1}^{z-m} \alpha_{k-m-n} + C_8 \kappa \rho^{z-1} \\
& \stackrel{(ii)}{\leq} 2C_5 C_\theta z \alpha_{k-z} + 2C_6 C_\lambda z \eta_{k-z} + C_7 C_\theta z(z-1) \alpha_{k-z} + C_8 \kappa \rho^{z-1}, \tag{63}
\end{aligned}$$

797 where the (i) uses triangle inequality, (ii) uses the non-increasing property of step sizes.

798 Let  $z = Z_K$ , recall  $Z_K := \min\{z \in \mathbb{N}^+ | \kappa \rho^{z-1} \leq \min\{\alpha_k, \eta_k, \eta_k\}\}$ , we have

$$\begin{aligned}
& \mathbb{E}\langle \bar{\lambda}_k - \lambda^*(\theta_k), \bar{g}_r(\xi_k, \bar{\lambda}_k) - g_r(\theta_k, \bar{\lambda}_k) \rangle \\
& \leq 2C_5 C_\theta Z_K \alpha_{k-Z_K} + 2C_6 C_\lambda Z_K \eta_{k-Z_K} + C_7 C_\theta Z_K^2 \alpha_{k-Z_K} + C_8 \alpha_{k-Z_K}. \tag{64}
\end{aligned}$$

799 Plug (64) into (62) will yield

$$\begin{aligned}
\|\bar{\lambda}_{k+1} - \lambda^*(\theta_k)\|^2 & \leq (1 - 2\lambda_\phi \eta_k) \|\bar{\lambda}_k - \lambda^*(\theta_k)\|^2 + C_\lambda^2 \eta_k^2 \\
& \quad + 4C_5 C_\theta Z_K \alpha_{k-Z_K} + 4C_6 C_\lambda Z_K \eta_{k-Z_K} + 2C_7 C_\theta Z_K^2 \alpha_{k-Z_K} + 2C_8 \alpha_{k-Z_K}.
\end{aligned}$$

800 By defining  $C_{K_3} := 4C_6 C_\lambda Z_K + C_\lambda^2$ ,  $C_{K_4} := 4C_5 C_\theta Z_K + 2C_7 C_\theta Z_K^2 + C_8$ , we complete the proof.

802

□

803 **Lemma 20.** Consider the sequence generated by Algorithm 1, for any  $z \in \mathbb{N}^+$ , we have

$$\begin{aligned}
\mathbb{E}[\langle \bar{\lambda}_k - \lambda^*(\theta), \bar{g}_r(\xi_k, \bar{\lambda}_k) - g_r(\theta_k, \bar{\lambda}_k) \rangle] & \leq C_5 \|\theta_k - \theta_{k-z}\| + C_6 \|\lambda_k - \lambda_{k-z}\| \\
& \quad + C_7 \sum_{m=0}^{z-1} \|\theta_{k-m} - \theta_{k-z}\| + C_8 \kappa \rho^{z-1}, \tag{65}
\end{aligned}$$

804 where  $C_5 := 4R_\lambda C_\lambda |\mathcal{A}| L_\pi (1 + \log_\rho \kappa^{-1} + (1 - \rho)^{-1}) + 2C_\lambda L_\lambda$ ,  $C_6 := 4R_\lambda + 2C_\lambda$ ,  $C_7 :=$   
805  $4R_\lambda C_\lambda |\mathcal{A}| L_\pi$ ,  $C_8 := 8R_\lambda C_\lambda$ .

806 *Proof.* Consider the Markov chain since timestep  $k - z$ :

$$s_{k-m} \xrightarrow{\theta_{k-m}} a_{k-m} \xrightarrow{\mathcal{P}} s_{k-m+1} \xrightarrow{\theta_{k-m+1}} a_{k-m+1} \cdots \xrightarrow{\theta_{k-1}} a_{k-1} \xrightarrow{\mathcal{P}} s_k \xrightarrow{\theta_k} a_k \xrightarrow{\mathcal{P}} s_{k+1}.$$

807 Also consider the auxiliary Markov chain with fixed policy since timestep  $k - z$ :

$$s_{k-m} \xrightarrow{\theta_{k-m}} a_{k-m} \xrightarrow{\mathcal{P}} s_{k-m+1} \xrightarrow{\theta_{k-m}} \tilde{a}_{k-m+1} \cdots \xrightarrow{\theta_{k-m}} \tilde{a}_{k-1} \xrightarrow{\mathcal{P}} \tilde{s}_k \xrightarrow{\theta_{k-m}} \tilde{a}_k \xrightarrow{\mathcal{P}} \tilde{s}_{k+1}.$$

808 Throughout the proof, we will use  $\theta, \theta', \bar{\lambda}, \bar{\lambda}', \xi, \tilde{\xi}$  to represent  $\theta_k, \theta_{k-z}, \bar{\lambda}_k, \bar{\lambda}_{k-z}, \xi_k, \xi_{k-z}$ , respec-  
809 tively.

810 For the ease of expression, define

$$\Delta_2(\xi, \lambda, \theta) := \langle \lambda - \lambda^*(\theta), \bar{g}_r(\xi, \lambda) - g_r(\theta, \lambda) \rangle.$$

811 We have

$$\begin{aligned}
\langle \bar{\lambda}_k - \lambda^*(\theta), \bar{g}_r(\xi_k, \bar{\lambda}_k) - g_r(\theta_k, \bar{\lambda}_k) \rangle & = \Delta_2(\xi, \bar{\lambda}, \theta) \\
& = \underbrace{\Delta_2(\xi, \bar{\lambda}, \theta) - \Delta_2(\xi, \bar{\lambda}, \theta')}_{I_1} + \underbrace{\Delta_2(\xi, \bar{\lambda}, \theta') - \Delta_2(\xi, \bar{\lambda}', \theta')}_{I_2} \\
& \quad + \underbrace{\Delta_2(\xi, \bar{\lambda}', \theta') - \Delta_2(\tilde{\xi}, \bar{\lambda}', \theta')}_{I_3} + \underbrace{\Delta_2(\tilde{\xi}, \bar{\lambda}', \theta')}_{I_4}.
\end{aligned}$$

812  $I_1$  can be expressed as

$$\begin{aligned}
I_1 &= \langle \bar{\lambda} - \lambda^*(\theta), \bar{g}_r(\xi, \bar{\lambda}) - g_r(\theta, \bar{\lambda}) \rangle - \langle \bar{\lambda} - \lambda^*(\theta'), \bar{g}_r(\xi, \bar{\lambda}) - g_r(\theta', \bar{\lambda}) \rangle \\
&= \langle \bar{\lambda} - \lambda^*(\theta), \bar{g}_r(\xi, \bar{\lambda}) - g_r(\theta, \bar{\lambda}) \rangle - \langle \bar{\lambda} - \lambda^*(\theta), \bar{g}_r(\xi, \bar{\lambda}) - g_r(\theta', \bar{\lambda}) \rangle \\
&\quad + \langle \lambda^*(\theta) - \lambda^*(\theta'), \bar{g}_r(\xi, \bar{\lambda}) - g_r(\theta', \bar{\lambda}) \rangle \\
&\leq \|\bar{\lambda} - \lambda^*(\theta)\| \|g_r(\theta', \bar{\lambda}) - g_r(\theta, \bar{\lambda})\| + \|\lambda^*(\theta) - \lambda^*(\theta')\| \|\bar{g}_r(\xi, \bar{\lambda}) - g_r(\theta', \bar{\lambda})\|. \tag{66}
\end{aligned}$$

813 The first term can be bounded as

$$\begin{aligned}
\|\bar{\lambda} - \lambda^*(\theta)\| \|g_r(\theta', \bar{\lambda}) - g_r(\theta, \bar{\lambda})\| &\leq 2R_\lambda \|\mathbb{E}_{\xi \sim \mu'_\theta} [\bar{g}_r(\xi, \bar{\lambda})] - \mathbb{E}_{\xi \sim \mu_\theta} [\bar{g}_r(\xi, \bar{\lambda})]\| \\
&\leq 4R_\lambda \sup_{\xi} \|\bar{g}_r(\xi, \bar{\lambda})\| d_{TV}(\mu'_\theta \otimes \pi'_\theta \otimes \mathcal{P}, \mu_\theta \otimes \pi_\theta \otimes \mathcal{P}) \\
&\leq 4R_\lambda C_\lambda d_{TV}(\mu'_\theta \otimes \pi'_\theta \otimes \mathcal{P}, \mu_\theta \otimes \pi_\theta \otimes \mathcal{P}) \\
&\leq 4R_\lambda C_\lambda |\mathcal{A}| L_\pi (1 + \log_\rho \kappa^{-1} + (1 - \rho)^{-1}) \|\theta - \theta'\|, \tag{67}
\end{aligned}$$

814 where the first inequality follows the projection update of each lambda step, the third inequality is  
815 due to  $\|\bar{g}_r(\xi, \bar{\lambda})\| \leq C_\lambda$ , and the last inequality follows Lemma 8.

816 The second term can be bounded as

$$\|\lambda^*(\theta) - \lambda^*(\theta')\| \|\bar{g}_r(\xi, \bar{\lambda}) - g_r(\theta', \bar{\lambda})\| \leq 2C_\lambda L_\lambda \|\theta - \theta'\| \tag{68}$$

817 Plug (67) and (68) into (66), we can bound  $I_1$  as

$$I_1 \leq (4R_\lambda C_\lambda |\mathcal{A}| L_\pi (1 + \log_\rho \kappa^{-1} + (1 - \rho)^{-1}) + 2C_\lambda L_\lambda) \|\theta - \theta'\|. \tag{69}$$

818 Next we bound  $I_2$  as

$$\begin{aligned}
I_2 &= \langle \bar{\lambda} - \lambda^*(\theta'), \bar{g}_r(\xi, \bar{\lambda}) - g_r(\theta', \bar{\lambda}) \rangle - \langle \bar{\lambda}' - \lambda^*(\theta'), \bar{g}_r(\xi, \bar{\lambda}') - g_r(\theta', \bar{\lambda}') \rangle \\
&= \langle \bar{\lambda} - \lambda^*(\theta'), \bar{g}_r(\xi, \bar{\lambda}) - g_r(\theta', \bar{\lambda}) \rangle - \langle \bar{\lambda}' - \lambda^*(\theta'), \bar{g}_r(\xi, \bar{\lambda}) - g_r(\theta', \bar{\lambda}) \rangle \\
&\quad + \langle \bar{\lambda}' - \lambda^*(\theta'), \bar{g}_r(\xi, \bar{\lambda}) - \bar{g}_r(\xi, \bar{\lambda}') - g_r(\theta', \bar{\lambda}) + g_r(\theta', \bar{\lambda}') \rangle.
\end{aligned}$$

819 The first two terms can be bounded as

$$\langle \bar{\lambda} - \bar{\lambda}', \bar{g}_r(\xi, \bar{\lambda}) - g_r(\theta', \bar{\lambda}) \rangle \leq 2C_\lambda \|\bar{\lambda} - \bar{\lambda}'\|. \tag{70}$$

820 The last term can be bounded as

$$\begin{aligned}
&\langle \bar{\lambda}' - \lambda^*(\theta'), \bar{g}_r(\xi, \bar{\lambda}) - \bar{g}_r(\xi, \bar{\lambda}') - g_r(\theta', \bar{\lambda}) + g_r(\theta', \bar{\lambda}') \rangle \\
&\leq \|\bar{\lambda} - \lambda^*(\theta')\| (\|\bar{g}_r(\xi, \bar{\lambda}) - \bar{g}_r(\xi, \bar{\lambda}')\| + \|g_r(\theta', \bar{\lambda}') - g_r(\theta', \bar{\lambda})\|) \\
&\leq 2R_\lambda (\|\bar{g}_r(\xi, \bar{\lambda}) - \bar{g}_r(\xi, \bar{\lambda}')\| + \|g_r(\theta', \bar{\lambda}') - g_r(\theta', \bar{\lambda})\|) \\
&\leq 4R_\lambda \|\bar{\lambda} - \bar{\lambda}'\|, \tag{71}
\end{aligned}$$

821 where the second inequality follows the projection of each lambda step. The last inequality is due to

$$\begin{aligned}
\|\bar{g}_r(\xi, \bar{\lambda}) - \bar{g}_r(\xi, \bar{\lambda}')\| &= \|\varphi(s, a)(\varphi(s, a)^T (\bar{\lambda} - \bar{\lambda}'))\| \\
&\leq \|\bar{\lambda} - \bar{\lambda}'\|
\end{aligned}$$

822 Combine (70) and (71), we can bound  $I_2$  as

$$I_2 \leq (4R_\lambda + 2C_\lambda) \|\bar{\lambda} - \bar{\lambda}'\|. \tag{72}$$

823 We bound  $I_3$  as

$$\begin{aligned}
\mathbb{E}[I_3 | \theta', s_{k-z+1}] &= \mathbb{E}[\Delta_2(\xi, \theta', \bar{\lambda}') - \Delta_2(\tilde{\xi}, \theta', \bar{\lambda}') | \theta', s_{k-z+1}] \\
&\leq 2 \sup_{\xi} |\Delta_2(\xi, \theta', \bar{\lambda}')| d_{TV}(\mathbb{P}(\xi \in \cdot | \theta', s_{k-z+1}), \mathbb{P}(\tilde{\xi} \in \cdot | \theta', s_{k-z+1})) \\
&\leq 8R_\lambda C_\lambda d_{TV}(\mathbb{P}(\xi \in \cdot | \theta', s_{k-z+1}), \mathbb{P}(\tilde{\xi} \in \cdot | \theta', s_{k-z+1})) \\
&\leq 4R_\lambda C_\lambda |\mathcal{A}| L_\pi \sum_{m=0}^{z-1} \|\theta_{k-m} - \theta_{k-z}\|. \tag{73}
\end{aligned}$$



824 Here, the second inequality is due to  $\|\Delta_2(\xi, \theta', \bar{\lambda}')\| \leq \|\lambda' - \lambda^*(\theta')\| \|\bar{g}_r(\xi, \lambda') - g_r(\theta', \lambda')\| \leq$   
 825  $4R_\lambda C_\lambda$ , and the last inequality is according to Lemma 13.

826 We now bound  $I_4$

$$\begin{aligned} \mathbb{E}[I_4 | \theta', \bar{\lambda}', s_{k+z-1}] &= \mathbb{E}[\Delta_2(\tilde{\xi}, \theta', \bar{\lambda}') | \theta', \bar{\lambda}', s_{k+z-1}] \\ &\leq \sup_{\xi} \|\Delta_2(\xi, \theta', \bar{\lambda}')\| \|\mathbb{P}(\xi \in \cdot | \theta', s_{k+z-1}) - \mu_{\theta'} \otimes \pi_{\theta'} \otimes \mathcal{P}\| \\ &\leq 8R_\lambda C_\lambda d_{TV}(\mathbb{P}(\tilde{x} \in \cdot | \theta', s_{k+z-1}), \mu_{\theta'} \otimes \pi_{\theta'} \otimes \mathcal{P}) \\ &\leq 8R_\lambda C_\lambda \kappa \rho^{z-1}, \end{aligned} \quad (74)$$

827 where the last inequality follows Lemma 5.

828 Plug (69), (72), (73), and (74) into (65), we get

$$\begin{aligned} \mathbb{E}[\Delta_2(\xi, \theta, \bar{\lambda})] &\leq (4R_\lambda C_\lambda |\mathcal{A}| L_\pi (1 + \log_\rho \kappa^{-1} + (1 - \rho)^{-1}) + 2C_\lambda L_\lambda) \mathbb{E}\|\theta_k - \theta_{k-z}\| \\ &\quad + (4R_\lambda + 2C_\lambda) \mathbb{E}\|\bar{\lambda}_k - \bar{\lambda}_{k-z}\| \\ &\quad + 4R_\lambda C_\lambda |\mathcal{A}| L_\pi \sum_{m=0}^{z-1} \mathbb{E}\|\theta_{k-m} - \theta_{k-z}\| \\ &\quad + 8R_\lambda C_\lambda \kappa \rho^{z-1}, \end{aligned}$$

829 which completes the proof.  $\square$

### 830 D.3 Consensus error

831 **Lemma 21** (bound of consensus error). *Suppose Assumptions 1 and 5 hold. Let  $\omega_k, \lambda_k$  be the*  
 832 *sequence generated by the algorithm 1, then for  $k \geq 1$ , the following hold*

$$\sum_{i=1}^N \|\omega_k^i - \bar{\omega}_k\|^2 \leq \nu^{2k} \|\omega_0\|_F^2 + \frac{16NC_\delta^2}{1-\nu} \beta_k^2 + \frac{8\sqrt{N}C_\delta \|\omega_0\|_F}{1-\nu} \nu^k \beta_k. \quad (75)$$

$$\sum_{i=1}^N \|\lambda_k^i - \bar{\lambda}_k\|^2 \leq \nu^{2k} \|\lambda_0\|_F^2 + \frac{16NC_\lambda^2}{1-\nu} \eta_k^2 + \frac{8\sqrt{N}C_\lambda \|\lambda_0\|_F}{1-\nu} \nu^k \eta_k, \quad (76)$$

833 where  $\nu \in [0, 1]$  is the second largest singular value of  $W$ .  $\omega_k, \lambda_k$  are defined as

$$\omega_k := \begin{bmatrix} (\omega_k^1)^T \\ \vdots \\ (\omega_k^N)^T \end{bmatrix}, \quad \lambda_k := \begin{bmatrix} (\lambda_k^1)^T \\ \vdots \\ (\lambda_k^N)^T \end{bmatrix}.$$

834 *Proof.* We will prove the bound in (75) for critic variables. The analysis for reward estimator in (76)  
 835 follows the same routine. To simplify the notation, we will use  $g_k^i$  to represent  $g_c^i(\xi_k, \omega_k^i)$  throughout  
 836 the proof of this lemma. We also use  $e_k^i$  to represent the projection error  $e_k^i := \prod_{R_\omega}(\omega_k^i - \beta_k g_k^i) -$   
 837  $(\omega_k^i - \beta_k g_k^i)$ . Also define  $\bar{g}_k := \frac{1}{N} \sum_{i=1}^N g_k^i$ ;  $\bar{e}_k := \frac{1}{N} \sum_{i=1}^N e_k^i$ . The corresponding matrix expressions  
 838 are

$$G_k := \begin{bmatrix} (g_k^1)^T \\ \vdots \\ (g_k^N)^T \end{bmatrix}, \quad E_k := \begin{bmatrix} (e_k^1)^T \\ \vdots \\ (e_k^N)^T \end{bmatrix}.$$

839 Then the following equality holds by the update rule of critic variables

$$\omega_{k+1} = \begin{cases} W\omega_k - \beta_k G_k + E_k, & \text{if } k \bmod K_c = 0 \\ \omega_k - \beta_k G_k + E_k, & \text{otherwise.} \end{cases} \quad (77)$$

840 Let  $Q := I - \frac{1}{N} \mathbf{1}\mathbf{1}^T$ , then the consensus error can be expressed as  $\|\omega_k - \mathbf{1}\bar{\omega}_k^T\|_F = \|Q\omega_k\|_F$ .

841 We bound the consensus error of critic's first

$$\|QG_k\| = \sqrt{\sum_{i=1}^N \|g_k^i - \bar{g}_k\|^2} \stackrel{(i)}{\leq} \sqrt{\sum_{i=1}^N 2\|g_k^i\|^2 + 2\|\bar{g}_k\|^2} \leq 2\sqrt{N}C_\delta. \quad (78)$$

$$\|QE_k\| = \sqrt{\sum_{i=1}^N \|e_k^i - \bar{e}_k\|^2} \leq \sqrt{\sum_{i=1}^N 2\|e_k^i\|^2 + 2\|\bar{e}_k\|^2} \stackrel{(ii)}{\leq} \sqrt{\sum_{i=1}^N 2\|g_k^i\|^2 + 2\|\bar{g}_k\|^2} \leq 2\beta_k\sqrt{N}C_\delta, \quad (79)$$

842 where (i) is due to  $\|g_k^i\| \leq C_\delta$ , (ii) is ensured by the convexity of the projection set.

843 We now study the consensus error of critic variables. Let  $k' = \lfloor \frac{k}{K_c} \rfloor * K_c$ . Without loss of generality,  
844 assume  $k \bmod K_c \neq 0$ . We have

$$\begin{aligned} Q\omega_{k+1} &= QW\omega_k - \beta_k QG_k + QE_k \\ &= WQ\omega_k + \beta_k QG_k + QE_k \\ &= W^{k+1}Q\omega_0 + \sum_{t=0}^k \beta_t W^{k-t}QG_t + \sum_{t=0}^k W^{k-t}QE_k, \end{aligned} \quad (80)$$

845 where the first equality follows (77). The second equality is due to the doubly stochasticity of matrix  
846  $W$  (see Assumption 5):  $QW = W - \frac{1}{N}\mathbf{1}\mathbf{1}^T W = W - \frac{1}{N}W\mathbf{1}\mathbf{1}^T = WQ$ . The last equality expands  
847 the recursion of the second equation.

848 Take Frobenius norm on each side of (80) and apply triangle inequality, we get

$$\begin{aligned} \|Q\omega_{k+1}\|_F &\leq \|W^k\omega_0\|_F + \sum_{t=0}^k \beta_t \|W^{k-t}QG_t\|_F + \sum_{t=0}^k \|W^{k-t}QE_k\|_F \\ &\leq \nu^k \|\omega_0\|_F + 4 \sum_{t=0}^k \beta_t \nu^{k-t} \sqrt{N}C_\delta \\ &\leq \nu^k \|\omega_0\|_F + \frac{4\sqrt{N}C_\delta\beta_k}{1-\nu}. \end{aligned} \quad (81)$$

849 The  $\nu$  in (81) denotes the second largest singular value of  $W$ , which satisfies  $\nu < 1$  as specified by  
850 Assumption 5. The second inequality uses (78), (79) and Lemma 9.

851 Take square on each side, we obtain

$$\|Q\omega_{k+1}\|_F^2 \leq \nu^{2k} \|\omega_0\|_F^2 + \frac{16NC_\delta^2}{1-\nu} \beta_k^2 + \frac{8\sqrt{N}C_\delta \|\omega_0\|_F}{1-\nu} \nu^k \beta_k$$

852 which completes the proof for (75). The proof of (76) follows similar procedure, we leave it as an  
853 exercise to reader.

854 □

#### 855 D.4 Error of actor

856 **Lemma 22.** Consider the sequence generated by Algorithm 1, for any  $z \geq 1$  we have

$$\begin{aligned} &\|\mathbb{E}_{\xi \sim \mu_{\theta_k}} [\delta(\xi, \theta_k) \psi_{\theta_k^i}(s_k, a_k^i)] - \mathbb{E}[\delta(\xi_k, \theta_k) \psi_{\theta_k^i}(s_k, a_k^i)]\| \\ &\leq 2C_\theta \kappa \rho^{z-1} + C_{12} \sum_{m=0}^{z-1} \|\theta_{k-m} - \theta_{k-z}\| + C_{13} \|\theta_k - \theta_{k-z}\| + C_{14} \|\theta_k^i - \theta_{k-z}^i\|, \end{aligned} \quad (82)$$

857 where  $C_{12} := 2C_\theta |\mathcal{A}| L_\pi$ ,  $C_{13} := |\mathcal{A}| L(\log_\rho \kappa^{-1} + (1-\rho)^{-1}) C_\theta + 2(1+\gamma) L_V$ ,  $C_{14} := 2C_\delta L_\psi$ .

858 *Proof.* Consider the Markov chain since timestep  $k-z$ :

$$s_{k-z} \xrightarrow{\theta_{k-z}} a_{k-z} \xrightarrow{\mathcal{P}} s_{k-z+1} \xrightarrow{\theta_{k-z+1}} a_{k-z+1} \cdots \xrightarrow{\theta_{k-1}} a_{k-1} \xrightarrow{\mathcal{P}} s_k \xrightarrow{\theta_k} a_k \xrightarrow{\mathcal{P}} s_{k+1}.$$

859 Also consider the auxiliary Markov chain with fixed policy since timestep  $k - z$ :

$$s_{k-z} \xrightarrow{\theta_{k-z}} a_{k-z} \xrightarrow{\mathcal{P}} s_{k-z+1} \xrightarrow{\theta_{k-z}} \tilde{a}_{k-z+1} \cdots \xrightarrow{\theta_{k-z}} \tilde{a}_{k-1} \xrightarrow{\mathcal{P}} \tilde{s}_k \xrightarrow{\theta_{k-z}} \tilde{a}_k \xrightarrow{\mathcal{P}} \tilde{s}_{k+1}.$$

860 Throughout the proof of this lemma, we wil use  $\psi_{\theta^i}$  to represent  $\psi_{\theta^i}(s_k, a_k^i)$  for brevity.

861 We define the following notation for the ease of discussion

$$\Delta_3(\xi, \theta) := \mathbb{E}_{\xi \sim \mu_\theta} [\delta(\xi, \theta) \psi_{\theta^i}] - \delta(\xi, \theta) \psi_{\theta^i}.$$

862 Then our objective is to bound

$$\mathbb{E}[\|\Delta_3(\xi_k, \theta_k)\| \mid \theta_{k-z}].$$

863 We decompose  $\|\Delta_3(\xi_k, \theta_k)\|$  by applying triangle inequality

$$\begin{aligned} \|\Delta_3(\xi_k, \theta_k)\| &\leq \underbrace{\|\Delta_3(\xi_k, \theta_k) - \Delta_3(\xi_k, \theta_{k-z})\|}_{I_1} \\ &\quad + \underbrace{\|\Delta_3(\xi_k, \theta_{k-z}) - \Delta_3(\tilde{\xi}_k, \theta_{k-z})\|}_{I_2} \\ &\quad + \underbrace{\|\Delta_3(\tilde{\xi}_k, \theta_{k-z})\|}_{I_3}. \end{aligned} \tag{83}$$

864 We apply triangle inequality again to bound  $I_1$  as

$$\begin{aligned} I_1 &\leq \underbrace{\|\delta(\xi_k, \theta_{k-z}) \psi_{\theta_{k-z}^i} - \delta(\xi_k, \theta_k) \psi_{\theta_k^i}\|}_{I_1^{(1)}} \\ &\quad + \underbrace{\|\mathbb{E}_{\xi \sim \mu_{\theta_k}} [\delta(\xi, \theta_k) \psi_{\theta_k^i}] - \mathbb{E}_{\xi \sim \mu_{\theta_{k-z}}} [\delta(\xi, \theta_{k-z}) \psi_{\theta_{k-z}^i}]\|}_{I_1^{(2)}} \end{aligned} \tag{84}$$

865  $I_1^{(1)}$  can be bounded as

$$\begin{aligned} I_1^{(1)} &= \|\delta(\xi_k, \theta_{k-z}) \psi_{\theta_{k-z}^i} - \delta(\xi_k, \theta_k) \psi_{\theta_k^i}\| \\ &\leq \|\delta(\xi_k, \theta_{k-z}) \psi_{\theta_{k-z}^i} - \delta(\xi_k, \theta_k) \psi_{\theta_{k-z}^i}\| \\ &\quad + \|\delta(\xi_k, \theta_k) \psi_{\theta_{k-z}^i} - \delta(\xi_k, \theta_k) \psi_{\theta_k^i}\| \\ &\leq \|\gamma(V_{\theta_{k-z}}(s') - V_{\theta_k}(s')) + (V_{\theta_{k-z}}(s) - V_{\theta_{k-z}}(s'))\| \psi_{\theta_{k-z}^i} \\ &\quad + \|\delta(\xi_k, \theta_k) \psi_{\theta_{k-z}^i} - \delta(\xi_k, \theta_k) \psi_{\theta_k^i}\| \\ &\leq (1 + \gamma)L_V \|\theta_k - \theta_{k-z}\| + \|\delta(\xi_k, \theta_k) \psi_{\theta_{k-z}^i} - \delta(\xi_k, \theta_k) \psi_{\theta_k^i}\| \\ &\leq (1 + \gamma)L_V \|\theta_k - \theta_{k-z}\| + C_\delta L_\psi \|\theta_k^i - \theta_{k-z}^i\|, \end{aligned} \tag{85}$$

866 where the second last inequality follows the Lipschitz continuous of value function in Lemma 7, and  
867 the last inequality uses Lipschitz continuous of  $\psi_{\theta^i}$ .

868  $I_1^{(2)}$  can be bounded as

$$\begin{aligned} I_1^{(2)} &= \|\mathbb{E}_{\xi \sim \mu_{\theta_k}} [\delta(\xi, \theta_k) \psi_{\theta_k^i}] - \mathbb{E}_{\xi \sim \mu_{\theta_{k-z}}} [\delta(\xi, \theta_{k-z}) \psi_{\theta_{k-z}^i}]\| \\ &= \|\mathbb{E}_{\xi \sim \mu_{\theta_k}} [\delta(\xi, \theta_{k-z}) \psi_{\theta_{k-z}^i}] - \mathbb{E}_{\xi \sim \mu_{\theta_{k-z}}} [\delta(\xi, \theta_{k-z}) \psi_{\theta_{k-z}^i}]\| \\ &\quad + \|\mathbb{E}_{\xi \sim \mu_{\theta_k}} [\delta(\xi, \theta_k) \psi_{\theta_k^i}] - \mathbb{E}_{\xi \sim \mu_{\theta_k}} [\delta(\xi, \theta_{k-z}) \psi_{\theta_{k-z}^i}]\| \\ &\leq |\mathcal{A}|L(\log_\rho \kappa^{-1} + (1 - \rho)^{-1})C_\theta \|\theta_k - \theta_{k-z}\| \\ &\quad + \|\mathbb{E}_{\xi \sim \mu_{\theta_k}} [\delta(\xi, \theta_k) \psi_{\theta_k^i}] - \mathbb{E}_{\xi \sim \mu_{\theta_k}} [\delta(\xi, \theta_{k-z}) \psi_{\theta_{k-z}^i}]\| \\ &\leq |\mathcal{A}|L(\log_\rho \kappa^{-1} + (1 - \rho)^{-1})C_\theta \|\theta_k - \theta_{k-z}\| \\ &\quad + (1 + \gamma)L_V \|\theta_k - \theta_{k-z}\| + C_\delta L_\psi \|\theta_k^i - \theta_{k-z}^i\|, \end{aligned} \tag{86}$$

869 where the first inequality applies Lemma 8, and the last inequality uses the derivation in (85).

870 Combine (85) and (86), we have

$$\begin{aligned} I_1 &\leq |\mathcal{A}|L(\log_\rho \kappa^{-1} + (1 - \rho)^{-1})C_\theta \|\theta_k - \theta_{k-z}\| \\ &\quad + 2(1 + \gamma)L_V \|\theta_k - \theta_{k-z}\| + 2C_\delta L_\psi \|\theta_k^i - \theta_{k-z}^i\| \end{aligned} \quad (87)$$

871 We now bound  $I_2$  as

$$\begin{aligned} \mathbb{E}[I_2] &= \mathbb{E} \|\delta(\tilde{\xi}_k, \theta_{k-z})\psi_{\theta_{k-z}}^i - \delta(\xi_k, \theta_{k-z})\psi_{\theta_{k-z}}^i\| \\ &\leq 2 \sup_{\xi} \|\delta(\xi, \theta_{k-z})\psi_{\theta_{k-z}}^i\| d_{TV}(P(\tilde{\xi}_k \in \cdot | \theta_{k-z}, s_{k-z}), P(\xi_k \in \cdot | \theta_{k-z}, s_{k-z})) \\ &\leq 2C_\theta \sum_{m=0}^{z-1} |\mathcal{A}|L_\pi \|\theta_{k-m} - \theta_{k-z}\|, \end{aligned} \quad (88)$$

872 where the last inequality follows Lemma 13.

873  $I_3$  can be bounded as

$$\begin{aligned} I_3 &= \mathbb{E} \|\mathbb{E}_{\xi \sim \mu_{\theta_{k-z}}} [\delta(\xi, \theta_{k-z})\psi_{\theta_{k-z}}^i] - \delta(\tilde{\xi}_k, \theta_{k-z})\psi_{\theta_{k-z}}^i\| \\ &\leq 2 \sup_{\xi} \|\delta(\xi, \theta_{k-z})\psi_{\theta_{k-z}}^i\| d_{TV}(P(\tilde{\xi} \in \cdot | \theta_{k-z}, s_{k-z}), \mu_{\theta_{k-z}} \otimes \pi_{\theta_{k-z}} \otimes \mathcal{P}) \\ &\leq 2C_\theta \kappa \rho^{z-1}, \end{aligned} \quad (89)$$

874 where the last inequality follows Lemma 5.

875 Plug (87), (88), and (89), we have

$$\begin{aligned} &\|\mathbb{E}_{\xi \sim \mu_{\theta_k}} [\delta(\xi, \theta_k)\psi_{\theta_k}^i(s_k, a_k^i)] - \mathbb{E}[\delta(\xi_k, \theta_k)\psi_{\theta_k}^i(s_k, a_k^i)]\| \\ &\leq 2C_\theta \kappa \rho^{z-1} + 2C_\delta L_\psi \|\theta_k^i - \theta_{k-z}^i\| + 2C_\theta \sum_{m=0}^{z-1} |\mathcal{A}|L_\pi \|\theta_{k-m} - \theta_{k-z}\| \\ &\quad + (|\mathcal{A}|L(\log_\rho \kappa^{-1} + (1 - \rho)^{-1})C_\theta + 2(1 + \gamma)L_V) \|\theta_k - \theta_{k-z}\|, \end{aligned}$$

876 which completes the proof.

877

□

878 **E Proof of main results**

879 **E.1 Proof of Theorem 1**

880 In this section, we provide the analysis for i.i.d. sampling. By Lemma 4, we have

$$\begin{aligned}
\mathbb{E}[J(\theta_{k+1})] - J(\theta_k) &\geq \mathbb{E}[\langle \nabla J(\theta_k), \theta_{k+1} - \theta_k \rangle] - \frac{L}{2} \|\theta_{k+1} - \theta_k\|^2 \\
&= \sum_{i=1}^N \mathbb{E}[\langle \nabla_{\theta^i} J(\theta_k), \theta_{k+1}^i - \theta_k^i \rangle] - \frac{L}{2} \sum_{i=1}^N \|\theta_{k+1}^i - \theta_k^i\|^2 \\
&= \sum_{i=1}^N \mathbb{E}[\alpha_k \langle \nabla_{\theta^i} J(\theta_k), g_a^i(\xi_k, \omega_{k+1}^i, \lambda_{k+1}^i) \rangle] - \frac{L}{2} \alpha_k^2 \sum_{i=1}^N \mathbb{E} \|g_a^i(\xi_k, \omega_{k+1}^i, \lambda_{k+1}^i)\|^2 \\
&\geq \sum_{i=1}^N \left[ \frac{\alpha_k}{2} \|\nabla_{\theta^i} J(\theta_k)\|^2 + \frac{\alpha_k}{2} \|\mathbb{E}[g_a^i(\xi_k, \omega_{k+1}^i, \lambda_{k+1}^i)]\|^2 \right. \\
&\quad \left. - \frac{\alpha_k}{2} \|\nabla_{\theta^i} J(\theta_k) - \mathbb{E}[g_a^i(\xi_k, \omega_{k+1}^i, \lambda_{k+1}^i)]\|^2 \right] - \frac{L}{2} N C_\theta^2 \alpha_k^2, \tag{90}
\end{aligned}$$

881 where the last inequality is due to  $\|g_a^i(\xi_k, \omega_{k+1}^i, \lambda_{k+1}^i)\| = \|\hat{\delta}(\xi_k, \omega_k^i, \lambda_k^i) \psi_{\theta_k^i}(s_k, a_k^i)\| \leq C_\delta C_\psi :=$   
882  $C_\theta$ .

883 For brevity, we will use  $\psi_{\theta_k^i}$  to represent  $\psi_{\theta_k^i}(s_k, a_k^i)$ . The gradient bias can be bounded as

$$\begin{aligned}
&\|\nabla_{\theta^i} J(\theta_k) - \mathbb{E}[g_a^i(\xi_k, \omega_{k+1}^i, \lambda_{k+1}^i) | \omega_{k+1}^i, \lambda_{k+1}^i]\|^2 \\
&\leq 4 \underbrace{\|\nabla_{\theta^i} J(\theta_k) - \mathbb{E}[\delta(\xi_k, \theta_k) \psi_{\theta_k^i}]\|^2}_{I_1} \\
&\quad + 4 \underbrace{\|\mathbb{E}[(\delta(\xi_k, \theta_k) - \tilde{\delta}(\xi_k, \omega^*(\theta_k))) \psi_{\theta_k^i}]\|^2}_{I_2} \\
&\quad + 4 \underbrace{\|\mathbb{E}[(\tilde{\delta}(\xi_k, \omega^*(\theta_k)) - \tilde{\delta}(\xi_k, \omega_{k+1}^i)) \psi_{\theta_k^i}]\|^2}_{I_3} \\
&\quad + 4 \underbrace{\|\mathbb{E}[(\tilde{\delta}(\xi_k, \omega_{k+1}^i) - \hat{\delta}(\xi_k, \omega_{k+1}^i, \lambda_{k+1}^i)) \psi_{\theta_k^i}]\|^2}_{I_4}, \tag{91}
\end{aligned}$$

884 where the inequality uses  $\|a + b + c + d\|^2 \leq 4\|a\|^2 + 4\|b\|^2 + 4\|c\|^2 + 4\|d\|^2$ .

885 From now on, we will use  $\xi \sim d_\theta$  to denote  $s \sim d_{\pi_\theta}$ ,  $a \sim \pi(\cdot|s)$ ,  $s' \sim \mathcal{P}$  for notational simplicity.

886  $I_1$  reflects the sampling error under perfect value function estimation of critic. It can be bounded as

$$\begin{aligned}
\mathbb{E}[I_1 | \theta_k] &= \|\nabla_{\theta^i} J(\theta_k) - \mathbb{E}[\delta(\xi_k, \theta_k) \psi_{\theta_k^i} | \theta_k]\|^2 \\
&= \|\mathbb{E}_{\xi \sim d_{\theta_k}} [\delta(\xi, \theta_k) \psi_{\theta_k^i} | \theta_k] - \mathbb{E}_{\xi \sim \mu_{\theta_k}} [\delta(\xi, \theta_k) \psi_{\theta_k^i} | \theta_k]\|^2 \\
&\leq (2 \sup_{\xi} |\bar{r}(s, a) + \gamma V_{\theta_k}(s') - V_{\theta_k}(s)| d_{TV}(\mu_{\theta_k} \otimes \pi_{\theta_k} \otimes \mathcal{P}, d_{\theta_k} \otimes \pi_{\theta_k} \otimes \mathcal{P}))^2 \\
&\leq (2r_{\max} C_\psi d_{TV}(\mu_{\theta_k}, d_{\theta_k}))^2 \\
&\leq 16C_\theta^2 (\log_\rho \kappa^{-1} + \frac{1}{\rho})^2 (1 - \gamma^2),
\end{aligned}$$

887 where the last inequality follows Lemma 6.

888 Define  $\varepsilon_{sp} := 4C_\theta^2 (\log_\rho \kappa^{-1} + \frac{1}{\rho})^2 (1 - \gamma^2)$ , then  $I_1$  can be bounded as

$$I_1 \leq 4\varepsilon_{sp}. \tag{92}$$

889 The term  $I_2$  describe the approximation quality of linear function class, it can be bounded as

$$\begin{aligned}
I_2 &= \|\mathbb{E}[(\delta(\xi_k, \theta_k) - \tilde{\delta}(\xi_k, \omega^*(\theta_k)))\psi_{\theta_k^i}]\|^2 \\
&\stackrel{(i)}{\leq} \mathbb{E}[|\delta(\xi_k, \theta_k) - \tilde{\delta}(\xi_k, \omega^*(\theta_k))|^2 \|\psi_{\theta_k^i}\|^2] \\
&\stackrel{(ii)}{\leq} C_\psi^2 \mathbb{E}[|\gamma(V_{\theta_k}(s_{k+1}) - \phi(s_{k+1})^T \omega^*(\theta_k)) + (V_{\theta_k}(s_k) - \phi(s_k)^T \omega^*(\theta_k))|^2] \\
&\stackrel{(iii)}{\leq} C_\psi^2 (2\mathbb{E}[\gamma^2 (V_{\theta_k}(s_{k+1}) - \phi(s_{k+1})^T \omega^*(\theta_k))^2] + 2\mathbb{E}[(V_{\theta_k}(s_k) - \phi(s_k)^T \omega^*(\theta_k))^2]) \\
&\stackrel{(iii)}{\leq} 2C_\psi^2 (1 + \gamma^2) \varepsilon_{app}^c \leq 4C_\psi^2 \varepsilon_{app}^c. \tag{93}
\end{aligned}$$

890 where (i) applies triangle inequality and Cauchy Schwarz inequality, (ii) follows Assump-  
891 tion 3, (iii) uses  $\|a + b\|^2 \leq 2\|a\|^2 + 2\|b\|^2$ , and (iii) follows the definition of  $\varepsilon_{app}^c :=$

$$892 \max_{\theta, a} \sqrt{\mathbb{E}_{s \sim \mu_\theta} [|V_{\pi_\theta}(s) - \hat{V}_{\omega^*}(\theta)(s)|^2]}.$$

893  $I_3$  can be bounded as

$$\begin{aligned}
\mathbb{E}[I_3] &= \|\mathbb{E}[(\tilde{\delta}(\xi_k, \omega^*(\theta_k)) - \tilde{\delta}(\xi_k, \omega_{k+1}^i))\psi_{\theta_k^i}]\|^2 \\
&\leq \mathbb{E}[|\tilde{\delta}(\xi_k, \omega^*(\theta_k)) - \tilde{\delta}(\xi_k, \omega_{k+1}^i)|^2 \|\psi_{\theta_k^i}\|^2] \\
&\leq C_\psi^2 \mathbb{E}[|\gamma \phi(s_k + 1)^T (\omega^*(\theta_k) - \omega_{k+1}^i) - \phi(s_k)^T (\omega^*(\theta_k) - \omega_{k+1}^i)|^2] \\
&\leq C_\psi^2 (2\mathbb{E}[|\gamma \phi(s_k + 1)^T (\omega^*(\theta_k) - \omega_{k+1}^i)|^2] + 2\mathbb{E}[|\phi(s_k)^T (\omega^*(\theta_k) - \omega_{k+1}^i)|^2]) \\
&\leq C_\psi^2 (2\gamma^2 \mathbb{E}[\|\phi(s_k + 1)\|^2 \|\omega^*(\theta_k) - \omega_{k+1}^i\|^2] + 2\mathbb{E}[\|\phi(s_k)\|^2 \|\omega^*(\theta_k) - \omega_{k+1}^i\|^2]) \\
&\stackrel{(i)}{\leq} 2C_\psi^2 (1 + \gamma^2) \|\omega^*(\theta_k) - \omega_{k+1}^i\|^2 \leq 4C_\psi^2 \|\omega^*(\theta_k) - \omega_{k+1}^i\|^2. \tag{94}
\end{aligned}$$

894 where the last inequality is due to  $\|\phi(s)\| \leq 1$ , as specified by Assumption 1.

895  $I_4$  can be bounded as

$$\begin{aligned}
\mathbb{E}[I_4] &= \|\mathbb{E}[(\tilde{\delta}(\xi_k, \omega_{k+1}^i) - \hat{\delta}(\xi_k, \omega_{k+1}^i, \lambda_{k+1}^i))\psi_{\theta_k^i} \lambda_{k+1}^i]\|^2 \\
&\leq \mathbb{E}[|\tilde{\delta}(\xi_k, \omega_{k+1}^i) - \hat{\delta}(\xi_k, \omega_{k+1}^i, \lambda_{k+1}^i)|^2 \|\psi_{\theta_k^i}\|^2 |\lambda_{k+1}^i|] \\
&\leq C_\psi^2 \mathbb{E}[|\bar{r}(s_k, a_k) - \varphi(s_k, a_k)^T \lambda_{k+1}^i|^2 |\lambda_{k+1}^i|] \\
&\leq C_\psi^2 (2\mathbb{E}[|\bar{r}(s_k, a_k) - \varphi(s_k, a_k)^T \lambda^*(\theta_k)|^2] + 2\mathbb{E}[|\varphi(s_k, a_k)^T \lambda^*(\theta_k) - \varphi(s_k, a_k)^T \lambda_{k+1}^i|^2 |\lambda_{k+1}^i|]) \\
&\leq 2C_\psi^2 \varepsilon_{app}^r + 2C_\psi^2 \|\lambda^*(\theta_k) - \lambda_{k+1}^i\|^2 \tag{95}
\end{aligned}$$

896 Thus, the gradient bias for  $i_{th}$  agent can be bounded as

$$\begin{aligned}
&\|\nabla_{\theta^i} F(\theta_k) - \mathbb{E}[g_a^i(\xi_k, \omega_{k+1}^i, \lambda_{k+1}^i)]\|^2 \\
&\leq 16\varepsilon_{sp} + 16C_\psi^2 \varepsilon_{app}^c + 16C_\psi^2 \|\omega^*(\theta_k) - \omega_{k+1}^i\|^2 \\
&\quad + 8C_\psi^2 \varepsilon_{app}^r + 8C_\psi^2 \|\lambda^*(\theta_k) - \lambda_{k+1}^i\|^2 \\
&\leq 16(\varepsilon_{sp} + C_\psi^2 \varepsilon_{app}^c) + 16C_\psi^2 \|\omega^*(\theta_k) - \omega_{k+1}^i\|^2 + 8C_\psi^2 \|\lambda^*(\theta_k) - \lambda_{k+1}^i\|^2, \tag{96}
\end{aligned}$$

897 where the last inequality follows the definition of  $\varepsilon_{app}$ .

898 Plug (96) into (90) gives us

$$\begin{aligned}
\mathbb{E}[J(\theta_{k+1})] - J(\theta_k) &\geq \sum_{i=1}^N \left( \frac{\alpha_k}{2} \mathbb{E}[\|\nabla_{\theta^i} J(\theta_k)\|^2] + \frac{\alpha_k}{2} \mathbb{E}[|g_a^i(\xi_k, \omega_{k+1}^i, \lambda_{k+1}^i)|^2] \right. \\
&\quad \left. - 8C_\psi^2 \alpha_k \mathbb{E}[\|\omega^*(\theta_k) - \omega_{k+1}^i\|^2] - 4C_\psi^2 \alpha_k \mathbb{E}[\|\lambda^*(\theta_k) - \lambda_{k+1}^i\|^2] \right) \\
&\quad - \frac{L}{2} N C_\theta^2 \alpha_k^2 - 8(\varepsilon_{sp} + C_\psi^2 \varepsilon_{app}) N \alpha_k. \tag{97}
\end{aligned}$$

899 Consider the Lyapunov function

$$\mathbb{V}_k := -J(\theta_k) + \|\bar{\omega}_k - \omega^*(\theta_k)\|^2 + \|\bar{\lambda}_k - \lambda^*(\theta_k)\|^2.$$

900 The difference between two Lyapunov functions will be

$$\begin{aligned}
\mathbb{E}[\mathbb{V}_{k+1}] - \mathbb{E}[\mathbb{V}_k] &= \mathbb{E}[J(\theta_k)] - \mathbb{E}[J(\theta_{k+1})] + \mathbb{E}\|\bar{\omega}_{k+1} - \omega^*(\theta_{k+1})\|^2 - \mathbb{E}\|\bar{\omega}_k - \omega^*(\theta_k)\|^2 \\
&\quad + \mathbb{E}\|\bar{\lambda}_{k+1} - \lambda^*(\theta_k)\|^2 - \mathbb{E}\|\bar{\lambda}_k - \lambda^*(\theta_k)\|^2 \\
&\leq \sum_{i=1}^N \left( -\frac{\alpha_k}{2} \|\nabla_{\theta^i} J(\theta_k)\|^2 - \frac{\alpha_k}{2} \mathbb{E}\|g_a^i(\xi_k, \omega_{k+1}^i)\|^2 \right) + \frac{L}{2} N C_\theta^2 \alpha_k^2 + 8(\varepsilon_{sp} + C_\psi^2 \varepsilon_{app}) N \alpha_k \\
&\quad + \underbrace{\sum_{i=1}^N 8C_\psi^2 \alpha_k \mathbb{E}\|\omega^*(\theta_k) - \omega_{k+1}^i\|^2 + \mathbb{E}\|\bar{\omega}_{k+1} - \omega^*(\theta_{k+1})\|^2 - \mathbb{E}\|\bar{\omega}_k - \omega^*(\theta_k)\|^2}_{I_5} \\
&\quad + \underbrace{\sum_{i=1}^N 4C_\psi^2 \alpha_k \mathbb{E}\|\lambda^*(\theta_k) - \lambda_{k+1}^i\|^2 + \mathbb{E}\|\bar{\lambda}_{k+1} - \lambda^*(\theta_{k+1})\|^2 - \mathbb{E}\|\bar{\lambda}_k - \lambda^*(\theta_k)\|^2}_{I_6}
\end{aligned} \tag{98}$$

901 The first two terms of  $I_5$  can be bounded as

$$\begin{aligned}
&\sum_{i=1}^N 8C_\psi^2 \alpha_k \mathbb{E}\|\omega^*(\theta_k) - \bar{\omega}_{k+1} + \bar{\omega}_{k+1} - \omega_{k+1}^i\|^2 + \mathbb{E}\|\bar{\omega}_{k+1} - \omega^*(\theta_{k+1})\|^2 \\
&= \sum_{i=1}^N 8C_\psi^2 \alpha_k \mathbb{E}\|\bar{\omega}_{k+1} - \omega_{k+1}^i\|^2 + 8C_\psi^2 \alpha_k \mathbb{E}\|\bar{\omega}_{k+1} - \omega^*(\theta_k)\|^2 + \mathbb{E}\|\bar{\omega}_{k+1} - \omega^*(\theta_{k+1})\|^2 \\
&\leq 8C_\psi^2 \alpha_k (\nu^{2k} \|\boldsymbol{\omega}_0\|_F + \frac{16NC_\delta^2}{1-\nu} \beta_k^2 + \frac{8\sqrt{N}C_\delta \|\boldsymbol{\omega}_0\|}{1-\nu} \nu^k \beta_k) \\
&\quad + 8C_\psi^2 \alpha_k \mathbb{E}\|\bar{\omega}_{k+1} - \omega^*(\theta_k)\|^2 + \mathbb{E}\|\bar{\omega}_{k+1} - \omega^*(\theta_{k+1})\|^2,
\end{aligned} \tag{99}$$

902 where the second equality is due to

$$\sum_{i=1}^N \langle \omega^*(\theta_k) - \bar{\omega}_{k+1}, \bar{\omega}_{k+1} - \omega_{k+1}^i \rangle = \langle \omega^*(\theta_k) - \bar{\omega}_{k+1}, \bar{\omega}_{k+1} - \bar{\omega}_{k+1} \rangle = 0,$$

903 and the last inequality follows the Lemma 21.

904 For the ease of expression, we define

$$M_{k_1} := 8C_\psi^2 (\nu^{2k} \|\boldsymbol{\omega}_0\|_F + \frac{16NC_\delta^2}{1-\nu} \beta_k^2 + \frac{8\sqrt{N}C_\delta \|\boldsymbol{\omega}_0\|_F}{1-\nu} \nu^k \beta_k). \tag{100}$$

905 Plug (100) into (99), we have

$$\begin{aligned}
I_5 &\leq 8C_\psi^2 \alpha_k \mathbb{E}\|\bar{\omega}_{k+1} - \omega^*(\theta_k)\|^2 + \mathbb{E}\|\bar{\omega}_{k+1} - \omega^*(\theta_{k+1})\|^2 + \alpha_k M_{k_1} \\
&\leq (1 + 4L_{\omega,2}^2 N \alpha_k + 8C_\psi^2 \alpha_k + \frac{L_{\omega,2}^2}{2} C_\theta^2 N^2 \alpha_k^2) \mathbb{E}\|\bar{\omega}_{k+1} - \omega^*(\theta_k)\|^2 \\
&\quad + \left( \frac{L_{\omega,2}^2 C_\theta^2 N^2}{2} + L_\omega^2 \right) \alpha_k^2 + \frac{\alpha_k}{4} \sum_{i=1}^N \mathbb{E}\|g_a^i(\xi_k, \omega_{k+1}^i, \lambda_{k+1}^i)\|^2 + \alpha_k M_{k_1},
\end{aligned} \tag{101}$$

906 where the second inequality follows (31) in Lemma 15.

907 Let  $C_9 := \min\{c \mid 4L_{\omega,2}^2 N \alpha_k + 8C_{\psi}^2 \alpha_k + \frac{L_{\omega,2}^2 C_{\theta}^2 N^2 \alpha_k^2}{2} \leq c \alpha_k\}$ . Plug the definition into (101),  
 908 we get

$$\begin{aligned}
 I_5 &\leq (1 + C_9 \alpha_k) \mathbb{E} \|\bar{\omega}_{k+1} - \omega^*(\theta_k)\|^2 + \left(\frac{L_{\omega,2}^2 C_{\theta}^2 N^2}{2} + L_{\omega}^2\right) \alpha_k^2 \\
 &\quad + \frac{\alpha_k}{4} \sum_{i=1}^N \|\mathbb{E}[g_a^i(\xi_k, \omega_{k+1}^i, \lambda_{k+1}^i)]\|^2 + \alpha_k M_{k_1} \\
 &\leq (1 + C_9 \alpha_k) (1 - 2\lambda_{\phi} \beta_k) \mathbb{E} \|\bar{\omega}_{k+1} - \omega^*(\theta_k)\|^2 + (1 + C_9 \alpha_k) C_{\delta}^2 \beta_k^2 \\
 &\quad + \left(\frac{L_{\omega,2}^2 C_{\theta}^2 N^2}{2} + L_{\omega}^2\right) \alpha_k^2 + \frac{\alpha_k}{4} \sum_{i=1}^N \|\mathbb{E}[g_a^i(\xi_k, \omega_{k+1}^i, \lambda_{k+1}^i)]\|^2 + \alpha_k M_{k_1}, \tag{102}
 \end{aligned}$$

909 where the last inequality follows (32) in Lemma 15.

910 By letting  $\beta_k = \frac{C_9}{2\lambda_{\phi}} \alpha_k$ , we can ensure

$$(1 + C_9 \alpha_k) (1 - 2\lambda_{\phi} \beta_k) < 0.$$

911 Therefore,  $I_5$  can be bounded as

$$I_5 \leq (1 + C_9 \alpha_k) C_{\delta}^2 \beta_k^2 + \frac{\alpha_k}{4} \sum_{i=1}^N \|\mathbb{E}[g_a^i(\xi_k, \omega_{k+1}^i, \lambda_{k+1}^i)]\|^2 + \alpha_k M_{k_1} + \left(\frac{L_{\omega,2}^2 C_{\theta}^2 N^2}{2} + L_{\omega}^2\right) \alpha_k^2. \tag{103}$$

912 By applying Lemma 18 and following the similar procedure, we can bound  $I_6$  as

$$I_6 \leq (1 + C_{10} \alpha_k) C_{\lambda}^2 \eta_k^2 + \frac{\alpha_k}{4} \sum_{i=1}^N \|\mathbb{E}[g_a^i(\xi_k, \omega_{k+1}^i, \lambda_{k+1}^i)]\|^2 + \alpha_k M_{k_2} + \left(\frac{L_{\lambda,2}^2 C_{\theta}^2 N^2}{2} + L_{\lambda}^2\right) \alpha_k^2, \tag{104}$$

913 with  $\eta_k = \frac{C_{10}}{2\lambda_{\phi}} \alpha_k$  and

$$\begin{aligned}
 C_{10} &:= \min\{c \mid 4\frac{L_{\lambda,2}^2}{2} C_{\theta}^2 \alpha_k + 8C_{\psi}^2 \alpha_k + \frac{L_{\lambda,2}^2 C_{\delta}^2}{2} \alpha_k^2 \leq c \alpha_k\}, \\
 M_{k_2} &:= 8C_{\psi}^2 (\nu^{2k} \|\lambda_0\|_F + \frac{16NC_{\lambda}^2}{1-\nu} \eta_k^2 + \frac{8\sqrt{N}C_{\lambda} \|\lambda_0\|_F}{1-\nu} \nu^k \eta_k). \tag{105}
 \end{aligned}$$

914 Plug (103) and (104) into (98), we have

$$\begin{aligned}
 \mathbb{E}[\mathbb{V}_{k+1}] - \mathbb{E}[\mathbb{V}_k] &\leq \sum_{i=1}^N \left(-\frac{\alpha_k}{2} \|\nabla_{\theta^i} J(\theta_k)\|^2 - \frac{\alpha_k}{2} \mathbb{E}\|g_a^i(\xi_k, \omega_{k+1}^i)\|^2\right) + \frac{\alpha_k}{2} \sum_{i=1}^N \|\mathbb{E}[g_a^i(\xi_k, \omega_{k+1}^i, \lambda_{k+1}^i)]\|^2 \\
 &\quad + (1 + C_9 \alpha_k) C_{\delta}^2 \beta_k^2 + (1 + C_{10} \alpha_k) C_{\lambda}^2 \eta_k^2 + \left(\frac{L}{2} N C_{\theta}^2 + C_{11}\right) \alpha_k^2 \\
 &\quad + (M_{k_1} + M_{k_2}) \alpha_k + 8(\varepsilon_{sp} + C_{\psi}^2 \varepsilon_{app} N) \alpha_k, \\
 &= \sum_{i=1}^N \left(-\frac{\alpha_k}{2} \|\nabla_{\theta^i} J(\theta_k)\|^2\right) + (M_{k_1} + M_{k_2}) \alpha_k + 8(\varepsilon_{sp} + C_{\psi}^2 \varepsilon_{app} N) \alpha_k \\
 &\quad + (1 + C_9 \alpha_k) C_{\delta}^2 \beta_k^2 + (1 + C_{10} \alpha_k) C_{\lambda}^2 \eta_k^2 + \left(\frac{L}{2} N C_{\theta}^2 + C_{11}\right) \alpha_k^2, \tag{106}
 \end{aligned}$$

915 where  $C_{11} := \frac{L_{\omega,2}^2 C_{\theta}^2 N^2}{2} + \frac{L_{\lambda,2}^2 C_{\theta}^2 N^2}{2} + L_{\omega}^2 + L_{\lambda}^2$ .

916 By telescoping (106), we get

$$\begin{aligned}
 \frac{1}{K} \sum_{k=0}^K \sum_{i=1}^N \mathbb{E} \|\nabla_{\theta^i} J(\theta_k)\|^2 &\leq \frac{2\mathbb{E}[\mathbb{V}_0]}{K \alpha_k} + 16(\varepsilon_{sp} + C_{\psi}^2 \varepsilon_{app} N) + \frac{2}{K} \sum_{k=0}^K (M_{k_1} + M_{k_2}) \\
 &\quad + (1 + C_9 \alpha_k) C_{\delta}^2 \frac{\beta_k^2}{\alpha_k} + (1 + C_{10} \alpha_k) C_{\lambda}^2 \frac{\eta_k^2}{\alpha_k} + \left(\frac{L}{2} N C_{\theta}^2 + C_{11}\right) \alpha_k. \tag{107}
 \end{aligned}$$



917 The third term can be bounded as

$$\begin{aligned}
& \frac{2}{K} \sum_{k=0}^K (M_{k_1} + M_{k_2}) \\
&= \frac{16C_\psi^2}{K} (\|\boldsymbol{\omega}_0\|_F + \|\boldsymbol{\lambda}_0\|_F) \sum_{k=1}^K \nu^{2k} + \frac{256NC_\psi^2}{(1-\nu)K} \sum_{k=0}^K (C_\delta^2 \beta_k^2 + C_\lambda^2 \eta_k^2) \\
&\quad + \frac{128\sqrt{N}C_\psi^2}{(1-\nu)K} \left( \sum_{k=1}^K C_\delta \|\boldsymbol{\omega}_0\|_F \nu^k \beta_k + \sum_{k=1}^K C_\lambda \|\boldsymbol{\lambda}_0\|_F \nu^k \eta_k \right) \\
&\leq \frac{16C_\psi^2}{K(1-\nu^2)} (\|\boldsymbol{\omega}_0\|_F + \|\boldsymbol{\lambda}_0\|_F) + \frac{256NC_\psi^2}{(1-\nu)} (C_\delta^2 \beta_k^2 + C_\lambda^2 \eta_k^2) \\
&\quad + \frac{128\sqrt{N}C_\psi^2}{(1-\nu)^2 K} (C_\delta \|\boldsymbol{\omega}_0\|_F \beta_k + C_\lambda \|\boldsymbol{\lambda}_0\|_F \eta_k) \\
&= o\left(\frac{1}{\sqrt{K}}\right), \tag{108}
\end{aligned}$$

918 where we use  $\sum_{k=0}^K \nu^k \leq \frac{1}{1-\nu}$  for the inequality.

919 Plug (108) back into (107) and let  $\alpha_k = \frac{\bar{\alpha}}{\sqrt{K}}$  for some positive constant  $\bar{\alpha}$ ,  $\beta_k = \frac{C_9}{2\lambda_\phi} \alpha_k$ ,  $\eta_k = \frac{C_{10}}{2\lambda_\varphi} \alpha_k$ ,  
920 we obtain the desired result.

## 921 E.2 Proof of Theorem 2

922 Following the proof under i.i.d. sampling in (90), we have

$$\begin{aligned}
& \mathbb{E}[J(\theta_{k+1})] - J(\theta_k) \\
&\geq \sum_{i=1}^N \left[ \frac{\alpha_k}{2} \|\nabla_{\theta^i} J(\theta_k)\|^2 + \frac{\alpha_k}{2} \|\mathbb{E}[g_a^i(\xi_k, \omega_{k+1}^i, \lambda_{k+1}^i)]\|^2 \right. \\
&\quad \left. - \frac{\alpha_k}{2} \|\nabla_{\theta^i} J(\theta_k) - \mathbb{E}[g_a^i(\xi_k, \omega_{k+1}^i, \lambda_{k+1}^i)]\|^2 - \frac{L}{2} NC_\theta^2 \alpha_k^2 \right]. \tag{109}
\end{aligned}$$

923 By following the derivation of (91), the gradient bias can be bounded as (crf.  $\psi_{\theta_k^i} := \psi_{\theta_k^i}(s_k, a_k^i)$ )

$$\begin{aligned}
& \|\nabla_{\theta^i} J(\theta_k) - \mathbb{E}[g_a^i(\xi_k, \omega_{k+1}^i, \lambda_{k+1}^i) | \omega_{k+1}^i, \lambda_{k+1}^i]\|^2 \\
&\leq 4 \underbrace{\|\nabla_{\theta^i} J(\theta_k) - \mathbb{E}[\delta(\xi_k, \theta_k) \psi_{\theta_k^i}]\|^2}_{I_1} \\
&\quad + 4 \underbrace{\|\mathbb{E}[(\delta(\xi_k, \theta_k) - \tilde{\delta}(\xi_k, \omega^*(\theta_k))) \psi_{\theta_k^i}]\|^2}_{I_2} \\
&\quad + 4 \underbrace{\|\mathbb{E}[(\tilde{\delta}(\xi_k, \omega^*(\theta_k)) - \tilde{\delta}(\xi_k, \omega_{k+1}^i)) \psi_{\theta_k^i}]\|^2}_{I_3} \\
&\quad + 4 \underbrace{\|\mathbb{E}[(\tilde{\delta}(\xi_k, \omega_{k+1}^i) - \tilde{\delta}(\xi_k, \omega_{k+1}^i, \lambda_{k+1}^i)) \psi_{\theta_k^i}]\|^2}_{I_4}, \tag{110}
\end{aligned}$$

924 We bound  $I_1$  as

$$\begin{aligned}
I_1 &= \|\nabla_{\theta^i} J(\theta_k) - \mathbb{E}[\delta(\xi_k, \theta_k) \psi_{\theta_k^i} | \theta_k]\|^2 \\
&= \|\mathbb{E}_{\xi \sim d_{\theta_k}}[\delta(\xi, \theta_k) \psi_{\theta_k^i} | \theta_k] - \mathbb{E}[\delta(\xi_k, \theta_k) \psi_{\theta_k^i} | \theta_k]\|^2 \\
&\leq 2 \underbrace{\|\mathbb{E}_{\xi \sim d_{\theta_k}}[\delta(\xi, \theta_k) \psi_{\theta_k^i} | \theta_k] - \mathbb{E}_{\xi \sim \mu_{\theta_k}}[\delta(\xi, \theta_k) \psi_{\theta_k^i} | \theta_k]\|^2}_{I_1^{(1)}} \\
&\quad + 2 \underbrace{\|\mathbb{E}_{\xi \sim \mu_{\theta}}[\delta(\xi, \theta_k) \psi_{\theta_k^i} | \theta_k] - \mathbb{E}[\delta(\xi_k, \theta_k) \psi_{\theta_k^i} | \theta_k]\|^2}_{I_1^{(2)}}
\end{aligned} \tag{111}$$

925 Follow the derivation of (92), we have

$$I_1^{(1)} \leq 4\varepsilon_{sp}.$$

926 By Lemma 22,  $I_1^{(2)}$  can be bounded as

$$\begin{aligned}
I_1^{(2)} &\leq (2C_{\theta} \kappa \rho^{z-1} + C_{12} \sum_{m=0}^{z-1} \|\theta_{k-m} - \theta_{k-z}\| + C_{13} \|\theta_k - \theta_{k-z}\| + C_{14} \|\theta_k^i - \theta_{k-z}^i\|)^2 \\
&\leq (2C_{\theta} \kappa \rho^{z-1} + C_{12} \sum_{m=0}^{z-1} \sum_{n=1}^{z-m} \|\theta_{k-m-n+1} - \theta_{k-m}\| + C_{13} \sum_{n=1}^z \|\theta_{k-n+1} - \theta_{k-n}\| + C_{14} \sum_{n=1}^z \|\theta_{k-n+1}^i - \theta_{k-n}^i\|)^2 \\
&\leq (2C_{\theta} \kappa \rho^{z-1} + C_{12} N C_{\theta} \frac{z(z+1)}{2} \alpha_{k-z} + C_{13} N z C_{\theta} \alpha_{k-z} + C_{14} z C_{\theta} \alpha_{k-z})^2 \\
&\leq 16C_{\theta}^2 \kappa^2 \rho^{2z-2} + 2C_{12}^2 C_{\theta}^2 z^2 \alpha_{k-z}^2 + 4C_{13}^2 N^2 z^2 C_{\theta}^2 \alpha_{k-z}^2 + 4C_{14}^2 z^2 C_{\theta}^2 \alpha_{k-z}^2,
\end{aligned} \tag{112}$$

927 where the second inequality uses triangle inequality, and the last inequality applies  $(a+b+c+d)^2 \leq$   
928  $4a^2 + 4b^2 + 4c^2 + 4d^2$ .

929 Let  $z = Z_K$ . Recall  $Z_K$  is defined as  $Z_K := \min\{z \in \mathbb{N}^+ | \kappa \rho^{z-1} \leq \min\{\alpha_k, \beta_k, \eta_k\}\}$ . Then we  
930 have

$$I_1^{(2)} \leq C_{K_5} \alpha_{k-Z_K}^2, \tag{113}$$

931 where we define  $C_{K_5} := 16C_{\theta}^2 + 2C_{12}^2 C_{\theta}^2 Z_K^2 + 4C_{13}^2 N^2 Z_K^2 C_{\theta}^2 + 4C_{14}^2 Z_K^2 C_{\theta}^2$ .

932 Thus, we have

$$I_1 \leq 4\varepsilon_{sp} + C_{K_5} \alpha_{k-Z_K}^2. \tag{114}$$

933 The bound of  $I_2, I_3$ , and  $I_4$  follows the analysis under i.i.d. sampling. Plug in (93), (94), and (95)  
934 will give us the bound of gradient bias

$$\begin{aligned}
&\|\nabla_{\theta^i} F(\theta_k) - \mathbb{E}[g_a^i(\xi_k, \omega_{k+1}^i, \lambda_{k+1}^i)]\|^2 \\
&\leq 16(\varepsilon_{sp} + C_{\psi}^2 \varepsilon_{app}) + 16C_{\psi}^2 \|\omega^*(\theta_k) - \omega_{k+1}^i\|^2 \\
&\quad + 8C_{\psi}^2 \|\lambda^*(\theta_k) - \lambda_{k+1}^i\|^2 + 4C_{K_5} \alpha_{k-Z_K}^2.
\end{aligned}$$

935 Thus, we have

$$\begin{aligned}
\mathbb{E}[J(\theta_{k+1})] - J(\theta_k) &\geq \sum_{i=1}^N \left( \frac{\alpha_k}{2} \mathbb{E} \|\nabla_{\theta^i} J(\theta_k)\|^2 + \frac{\alpha_k}{2} \mathbb{E} \|g_a^i(\xi_k, \omega_{k+1}^i, \lambda_{k+1}^i)\|^2 \right. \\
&\quad \left. - 8C_{\psi}^2 \alpha_k \mathbb{E} \|\omega^*(\theta_k) - \omega_{k+1}^i\|^2 - 4C_{\psi}^2 \alpha_k \mathbb{E} \|\lambda^*(\theta_k) - \lambda_{k+1}^i\|^2 \right) \\
&\quad - \frac{L}{2} N C_{\theta}^2 \alpha_k^2 - 2N C_{K_5} \alpha_{k-Z_K}^2 - 8(\varepsilon_{sp} + C_{\psi}^2 \varepsilon_{app}) N \alpha_k.
\end{aligned} \tag{115}$$

936 Consider the Lyapunov function

$$\mathbb{V}_k := -J(\theta_k) + \|\bar{\omega}_k - \omega^*(\theta_k)\|^2 + \|\bar{\lambda}_k - \lambda^*(\theta_k)\|^2. \tag{116}$$

937 The difference between two Lyapunov functions will be

$$\begin{aligned}
\mathbb{E}[\mathbb{V}_{k+1}] - \mathbb{E}[\mathbb{V}_k] &= \mathbb{E}[J(\theta_k)] - \mathbb{E}[J(\theta_{k+1})] + \mathbb{E}\|\bar{\omega}_{k+1} - \omega^*(\theta_{k+1})\|^2 - \mathbb{E}\|\bar{\omega}_k - \omega^*(\theta_k)\|^2 \\
&\quad + \mathbb{E}\|\bar{\lambda}_{k+1} - \lambda^*(\theta_k)\|^2 - \mathbb{E}\|\bar{\lambda}_k - \lambda^*(\theta_k)\|^2 \\
&\leq \sum_{i=1}^N \left( -\frac{\alpha_k}{2} \|\nabla_{\theta^i} J(\theta_k)\|^2 - \frac{\alpha_k}{2} \mathbb{E}\|g_a^i(\xi_k, \omega_{k+1}^i)\|^2 \right) \\
&\quad + 2NC_{K_5}\alpha_k - Z_K + \frac{L}{2}NC_\theta^2\alpha_k^2 + 8(\varepsilon_{sp} + C_\psi^2\varepsilon_{app})N\alpha_k \\
&\quad + \underbrace{\sum_{i=1}^N 8C_\psi^2\alpha_k \mathbb{E}\|\omega^*(\theta_k) - \omega_{k+1}^i\|^2 + \mathbb{E}\|\bar{\omega}_{k+1} - \omega^*(\theta_{k+1})\|^2 - \mathbb{E}\|\bar{\omega}_k - \omega^*(\theta_k)\|^2}_{I_5} \\
&\quad + \underbrace{\sum_{i=1}^N 4C_\psi^2\alpha_k \mathbb{E}\|\lambda^*(\theta_k) - \lambda_{k+1}^i\|^2 + \mathbb{E}\|\bar{\lambda}_{k+1} - \lambda^*(\theta_{k+1})\|^2 - \mathbb{E}\|\bar{\lambda}_k - \lambda^*(\theta_k)\|^2}_{I_6}.
\end{aligned} \tag{117}$$

938 The first two terms of  $I_5$  can be bounded as

$$\begin{aligned}
&\sum_{i=1}^N 8C_\psi^2\alpha_k \mathbb{E}\|\omega^*(\theta_k) - \bar{\omega}_{k+1} + \bar{\omega}_{k+1} - \omega_{k+1}^i\|^2 + \mathbb{E}\|\bar{\omega}_{k+1} - \omega^*(\theta_{k+1})\|^2 \\
&= \sum_{i=1}^N 8C_\psi^2\alpha_k \mathbb{E}\|\bar{\omega}_{k+1} - \omega_{k+1}^i\|^2 + 8C_\psi^2\alpha_k \mathbb{E}\|\bar{\omega}_{k+1} - \omega^*(\theta_k)\|^2 + \mathbb{E}\|\bar{\omega}_{k+1} - \omega^*(\theta_{k+1})\|^2 \\
&\leq 8C_\psi^2\alpha_k \mathbb{E}\|\bar{\omega}_{k+1} - \omega^*(\theta_k)\|^2 + \mathbb{E}\|\bar{\omega}_{k+1} - \omega^*(\theta_{k+1})\|^2 + \alpha_k M_{k_1} \\
&\leq (1 + 4L_{\omega,2}^2 N\alpha_k + 8C_\psi^2\alpha_k + \frac{L_{\omega,2}^2}{2} C_\theta^2 N^2 \alpha_k^2) \mathbb{E}\|\bar{\omega}_{k+1} - \omega^*(\theta_k)\|^2 \\
&\quad + \left( \frac{L_{\omega,2}^2 C_\theta^2 N^2}{2} + L_\omega^2 \right) \alpha_k^2 + \frac{\alpha_k}{4} \sum_{i=1}^N \mathbb{E}\|g_a^i(\xi_k, \omega_{k+1}^i, \lambda_{k+1}^i)\|^2 + \alpha_k M_{k_1},
\end{aligned} \tag{118}$$

939 where the equality is due to

$$\sum_{i=1}^N \langle \omega^*(\theta_k) - \bar{\omega}_{k+1}, \bar{\omega}_{k+1} - \omega_{k+1}^i \rangle = \langle \omega^*(\theta_k) - \bar{\omega}_{k+1}, \bar{\omega}_{k+1} - \bar{\omega}_{k+1} \rangle = 0.$$

940 The first inequality follows the Lemma 21, with  $M_{k_1}$  is defined in (100). The last inequality follows  
941 (39) in Lemma 16.

942 Plug (118) into (117), and recall  $C_9 := \min\{c \mid 4L_{\omega,2}^2 N\alpha_k + 8C_\psi^2\alpha_k + \frac{L_{\omega,2}^2}{2} C_\theta^2 N^2 \alpha_k^2 \leq c\alpha_k\}$ , we  
943 get

$$\begin{aligned}
I_5 &\leq (1 + C_9\alpha_k) \mathbb{E}\|\bar{\omega}_{k+1} - \omega^*(\theta_k)\|^2 + \left( \frac{L_{\omega,2}^2 C_\theta^2 N^2}{2} + L_\omega^2 \right) \alpha_k^2 \\
&\quad + \frac{\alpha_k}{4} \sum_{i=1}^N \mathbb{E}\|g_a^i(\xi_k, \omega_{k+1}^i, \lambda_{k+1}^i)\|^2 + \alpha_k M_{k_1} \\
&\leq (1 + C_9\alpha_k)(1 - 2\lambda_\phi\beta_k) \mathbb{E}\|\bar{\omega}_{k+1} - \omega^*(\theta_k)\|^2 \\
&\quad + (1 + C_9\alpha_k)(C_{K_1}\beta_k\beta_{k-Z_K} + C_{K_2}\beta_k\alpha_{k-Z_K}) \\
&\quad + \left( \frac{L_{\omega,2}^2 C_\theta^2 N^2}{2} + L_\omega^2 \right) \alpha_k^2 + \frac{\alpha_k}{4} \sum_{i=1}^N \mathbb{E}\|g_a^i(\xi_k, \omega_{k+1}^i, \lambda_{k+1}^i)\|^2 + \alpha_k M_{k_1},
\end{aligned} \tag{119}$$

944 where the last inequality follows (40) in Lemma 16.

945 By letting  $\beta_k = \frac{C_9}{2\lambda_\phi} \alpha_k$ , we can ensure

$$(1 + C_9 \alpha_k)(1 - 2\lambda_\phi \beta_k) < 0.$$

946 Therefore,  $I_5$  can be bounded as

$$\begin{aligned} I_5 &\leq \frac{\alpha_k}{4} \sum_{i=1}^N \|\mathbb{E}[g_a^i(\xi_k, \omega_{k+1}^i, \lambda_{k+1}^i)]\|^2 + \alpha_k M_{k_1} + \left(\frac{L_{\omega,2}^2 C_\theta^2 N^2}{2} + L_\omega^2\right) \alpha_k^2 \\ &\quad + (1 + C_9 \alpha_k)(C_{K_1} \beta_k \beta_{k-Z_K} + C_{K_2} \beta_k \alpha_{k-Z_K}). \end{aligned} \quad (120)$$

947 By applying Lemma 19 and following the similar procedure, we can bound  $I_6$  as

$$\begin{aligned} I_6 &\leq \frac{\alpha_k}{4} \sum_{i=1}^N \|\mathbb{E}[g_a^i(\xi_k, \omega_{k+1}^i, \lambda_{k+1}^i)]\|^2 + \alpha_k M_{k_2} + \left(\frac{L_{\lambda,2}^2 C_\theta^2 N^2}{2} + L_\lambda^2\right) \alpha_k^2 \\ &\quad + (1 + C_{10} \alpha_k)(C_{K_3} \eta_k \eta_{k-Z_K} + C_{K_4} \eta_k \alpha_{k-Z_K}). \end{aligned} \quad (121)$$

948 with  $\eta_k = \frac{C_{10}}{2\lambda_\phi} \alpha_k$ , and  $M_{k_2}$  defined in (105).

949 Plug (120) and (121) into (117), we have

$$\begin{aligned} \mathbb{E}[\mathbb{V}_{k+1}] - \mathbb{E}[\mathbb{V}_k] &\leq \sum_{i=1}^N -\frac{\alpha_k}{2} \|\nabla_{\theta^i} J(\theta_k)\|^2 + (M_{k_1} + M_{k_2}) \alpha_k \\ &\quad + (1 + C_9 \alpha_k)(C_{K_1} \beta_k \beta_{k-Z_K} + C_{K_2} \beta_k \alpha_{k-Z_K}) \\ &\quad + (1 + C_{10} \alpha_k)(C_{K_3} \eta_k \eta_{k-Z_K} + C_{K_4} \eta_k \alpha_{k-Z_K}) \\ &\quad + \left(\frac{L}{2} N C_\theta^2 + C_{11}\right) \alpha_k^2 + 8(\varepsilon_{sp} + C_\psi^2 \varepsilon_{app} N) \alpha_k, \end{aligned} \quad (122)$$

950 where we recall  $C_{11} := \frac{L_{\omega,2}^2 C_\theta^2 N^2}{2} + \frac{L_{\lambda,2}^2 C_\theta^2 N^2}{2} + L_\omega^2 + L_\lambda^2$ .

951 By letting  $\alpha_k = \frac{\bar{\alpha}}{\sqrt{K}}$  for some positive constant  $\bar{\alpha}$ , and recall  $\beta_k = \frac{C_9}{2\lambda_\phi} \alpha_k$ ,  $\eta_k = \frac{C_{10}}{2\lambda_\phi} \alpha_k$ , we can  
952 telescope (122) as

$$\begin{aligned} \frac{1}{K} \sum_{k=0}^K \sum_{i=1}^N \mathbb{E} \|\nabla_{\theta^i} J(\theta_k)\|^2 &\leq \frac{2\mathbb{E}[\mathbb{V}_0]}{K \alpha_k} + 16(\varepsilon_{sp} + C_\psi^2 \varepsilon_{app} N) + \frac{2}{K} \sum_{k=0}^K (M_{k_1} + M_{k_2}) \\ &\quad + (1 + C_9 \alpha_k)(C_{K_1} \frac{\beta_k}{\alpha_k} \beta_{k-Z_K} + C_{K_2} \frac{\beta_k}{\alpha_k} \alpha_{k-Z_K}) \\ &\quad + (1 + C_{10} \alpha_k)(C_{K_3} \frac{\eta_k}{\alpha_k} \eta_{k-Z_K} + C_{K_4} \frac{\eta_k}{\alpha_k} \alpha_{k-Z_K}) \\ &\quad + \left(\frac{L}{2} N C_\theta^2 + C_{11}\right) \alpha_k. \end{aligned} \quad (123)$$

953 The third term can be bounded as

$$\begin{aligned} \frac{2}{K} \sum_{k=0}^K (M_{k_1} + M_{k_2}) &= \frac{16C_\psi^2}{K} (\|\boldsymbol{\omega}_0\|_F + \|\boldsymbol{\lambda}_0\|_F) \sum_{k=1}^K \nu^{2k} + \frac{256NC_\psi^2}{(1-\nu)K} \sum_{k=0}^K (C_\delta^2 \beta_k^2 + C_\lambda^2 \eta_k^2) \\ &\quad + \frac{128\sqrt{N}C_\psi^2}{(1-\nu)K} \left( \sum_{k=1}^K C_\delta \|\boldsymbol{\omega}_0\|_F \nu^k \beta_k + \sum_{k=1}^K C_\lambda \|\boldsymbol{\lambda}_0\|_F \nu^k \eta_k \right) \\ &\leq \frac{16C_\psi^2}{K(1-\nu^2)} (\|\boldsymbol{\omega}_0\|_F + \|\boldsymbol{\lambda}_0\|_F) + \frac{256NC_\psi^2}{(1-\nu)} (C_\delta^2 \beta_k^2 + C_\lambda^2 \eta_k^2) \\ &\quad + \frac{128\sqrt{N}C_\psi^2}{(1-\nu)^2 K} (C_\delta \|\boldsymbol{\omega}_0\|_F \beta_k + C_\lambda \|\boldsymbol{\lambda}_0\|_F \eta_k) \\ &= o\left(\frac{1}{\sqrt{K}}\right), \end{aligned} \quad (124)$$

954 where we use  $\sum_{k=0}^K \nu^k \leq \frac{1}{1-\nu}$  for the inequality.

955 Plug (124) back into (123). By noticing  $C_{K_1} = \mathcal{O}(\log \frac{1}{\alpha_k})$ ,  $C_{K_2} = \mathcal{O}(\log^2 \frac{1}{\alpha_k})$ ,  $C_{K_3} =$   
 956  $\mathcal{O}(\log \frac{1}{\alpha_k})$ ,  $C_{K_4} = \mathcal{O}(\log^2 \frac{1}{\alpha_k})$ , we obtain the desired result.

### 957 E.3 Proof of Theorem 3

958 Define the update of actor  $i$  using the noisy reward as

$$g_a^i(\epsilon_k, \omega_{k+1}^i) := \tilde{r}_{k, K_r}^i(s_k, a_k) + \gamma \phi(s')^T \omega_{k+1}^i - \phi(s)^T \omega_{k+1}^i. \quad (125)$$

959 Following the derivation of (90), we have

$$\begin{aligned} \mathbb{E}[J(\theta_{k+1})] - J(\theta_k) &\geq \sum_{i=1}^N \left[ \frac{\alpha_k}{2} \|\nabla_{\theta^i} J(\theta_k)\|^2 + \frac{\alpha_k}{2} \|\mathbb{E}[g_a^i(\xi_k, \omega_{k+1}^i)]\|^2 \right. \\ &\quad \left. - \frac{\alpha_k}{2} \|\nabla_{\theta^i} J(\theta_k) - \mathbb{E}[g_a^i(\xi_k, \omega_{k+1}^i)]\|^2 \right] - \frac{L}{2} N C_\theta^2 \alpha_k^2. \end{aligned} \quad (126)$$

960 Similarly to the proof of Theorem 1 and 2, the gradient bias term can be decomposed as as

$$\begin{aligned} \|\nabla_{\theta^i} J(\theta_k) - \mathbb{E}[g_a^i(\xi_k, \omega_{k+1}^i)]\|^2 &\leq 4 \underbrace{\|\nabla_{\theta^i} J(\theta_k) - \mathbb{E}[\delta(\xi_k, \theta_k) \psi_{\theta_k^i}]\|^2}_{I_1} \\ &\quad + 4 \underbrace{\|\mathbb{E}[(\delta(\xi_k, \theta_k) - \tilde{\delta}(\xi_k, \omega^*(\theta_k))) \psi_{\theta_k^i}]\|^2}_{I_2} \\ &\quad + 4 \underbrace{\|\mathbb{E}[(\tilde{\delta}(\xi_k, \omega^*(\theta_k)) - \tilde{\delta}(\xi_k, \omega_{k+1}^i)) \psi_{\theta_k^i}]\|^2}_{I_3} \\ &\quad + 4 \underbrace{\|\mathbb{E}[(\tilde{r}_k(s_k, a_k) - \tilde{r}_{k, K_r}^i(s_k, a_k)) \psi_{\theta_k^i}]\|^2}_{I_4} \end{aligned} \quad (127)$$

961  $I_1, I_2, I_3$  can be bounded following the derivation of (114), (91), and (96), respectively. Plug these  
 962 bounds into (127), we have

$$\begin{aligned} \mathbb{E}[J(\theta_{k+1})] - J(\theta_k) &\geq \sum_{i=1}^N \left( \frac{\alpha_k}{2} \mathbb{E} \|\nabla_{\theta^i} J(\theta_k)\|^2 + \frac{\alpha_k}{2} \mathbb{E} \|g_a^i(\xi_k, \omega_{k+1}^i)\|^2 - 8C_\psi^2 \alpha_k \mathbb{E} \|\omega^*(\theta_k) - \omega_{k+1}^i\|^2 \right) \\ &\quad - \sum_{i=1}^N \frac{\alpha_k}{2} C_\psi^2 \|\tilde{r}_k(s_k, a_k) - \tilde{r}_{k, K_r}^i(s_k, a_k)\|^2 - \frac{L}{2} N C_\theta^2 \alpha_k^2 \\ &\quad - 2N C_{K_5} \alpha_k^2 - Z_K - 8(\varepsilon_{sp} + C_\psi^2 \varepsilon_{app}) N \alpha_k. \end{aligned} \quad (128)$$

963 Define  $\tilde{r}_{k, K_r} := [r_{k, K_r}^1, \dots, r_{k, K_r}^N]^T$ . The reward bias can be bounded as

$$\begin{aligned} \sum_{i=1}^N \|\tilde{r}_k(s_k, a_k) - \tilde{r}_{k, K_r}^i(s_k, a_k)\|^2 &= \|Q \tilde{r}_{k, K_r}\|^2 \\ &= \|Q W^{K_r} \tilde{r}_{k, 0}(s_k, a_k)\|^2 \\ &\leq \nu^{2K_r} \|\tilde{r}_{k, 0}(s_k, a_k)\|^2 \\ &= \nu^{2K_r} \sum_{i=1}^N (\|\tilde{r}_{k, 0}^i(s_k, a_k) - \bar{r}_k(s_k, a_k)\|^2 + \|\bar{r}_k(s_k, a_k)\|^2) \\ &\leq \nu^{2K_r} N(\sigma^2 + r_{\max}), \end{aligned} \quad (129)$$

964 where  $\sigma^2$  is the variance of the reward noise. Let  $K_r = \frac{1}{2} \log_\nu \alpha_k$  and define  $C_{15} := \sigma^2 + r_{\max}^2$ .  
 965 Plug (128) back to (127), we have

$$\begin{aligned} \mathbb{E}[J(\theta_{k+1})] - J(\theta_k) &\geq \sum_{i=1}^N \left( \frac{\alpha_k}{2} \mathbb{E} \|\nabla_{\theta^i} J(\theta_k)\|^2 + \frac{\alpha_k}{2} \mathbb{E} \|g_a^i(\xi_k, \omega_{k+1}^i)\|^2 - 8C_\psi^2 \alpha_k \mathbb{E} \|\omega^*(\theta_k) - \omega_{k+1}^i\|^2 \right) \\ &\quad + \frac{N}{2} (C_{15} + C_\theta^2 L) \alpha_k^2 - 2N C_{K_5} \alpha_k^2 - Z_K - 8(\varepsilon_{sp} + C_\psi^2 \varepsilon_{app}) N \alpha_k. \end{aligned}$$

966 Consider the Lyapunov function

$$\mathbb{V}_k := -J(\theta_k) + \|\bar{\omega}_k - \omega^*(\theta_k)\|^2.$$

967 The difference between two Lyapunov functions is

$$\begin{aligned} \mathbb{E}[\mathbb{V}_{k+1}] - \mathbb{E}[\mathbb{V}_k] &\leq \sum_{i=1}^N \left( -\frac{\alpha_k}{2} \|\nabla_{\theta^i} J(\theta_k)\|^2 - \frac{\alpha_k}{2} \mathbb{E} \|g_a^i(\xi_k, \omega_{k+1}^i)\|^2 \right) \\ &\quad + \frac{N}{2} C_{16} \alpha_k^2 - 2N C_{K_5} \alpha_{k-Z_K}^2 - 8(\varepsilon_{sp} + C_\psi^2 \varepsilon_{app}) N \alpha_k \\ &\quad + \underbrace{\sum_{i=1}^N 8C_\psi^2 \alpha_k \mathbb{E} \|\omega^*(\theta_k) - \omega_{k+1}^i\|^2 + \mathbb{E} \|\bar{\omega}_{k+1} - \omega^*(\theta_{k+1})\|^2 - \mathbb{E} \|\bar{\omega}_k - \omega^*(\theta_k)\|^2}_{I_5}. \end{aligned}$$

968  $I_5$  can be bounded by following the derivation of (120). Thus, we have

$$\begin{aligned} &\mathbb{E}[\mathbb{V}_{k+1}] - \mathbb{E}[\mathbb{V}_k] \\ &\leq \sum_{i=1}^N -\frac{\alpha_k}{2} \|\nabla_{\theta^i} J(\theta_k)\|^2 + \frac{N}{2} C_{16} \alpha_k^2 - 2N C_{K_5} \alpha_{k-Z_K}^2 - 8(\varepsilon_{sp} + C_\psi^2 \varepsilon_{app}) N \alpha_k \\ &\quad + (1 + C_9 \alpha_k) (C_{K_1} \beta_k \beta_{k-Z_K} + C_{K_2} \beta_k \alpha_{k-Z_K}) + M_{k_1} \alpha_k, \end{aligned} \quad (130)$$

969 where  $C_{16} := C_{15} + C_\theta^2 L + \frac{L_{\omega,2}^2 C_\theta^2 N^2}{2} + L_\omega^2$ .

970 Telescoping (130), we have

$$\begin{aligned} \frac{1}{K} \sum_{k=0}^K \sum_{i=1}^N \mathbb{E} \|\nabla_{\theta^i} J(\theta_k)\|^2 &\leq \frac{2\mathbb{E}[\mathbb{V}_0]}{K \alpha_k} + 16(\varepsilon_{sp} + C_\psi^2 \varepsilon_{app} N) + \frac{2}{K} \sum_{k=0}^K M_{k_1} + C_{16} \alpha_k \\ &\quad + (1 + C_9 \alpha_k) \left( C_{K_1} \frac{\beta_k}{\alpha_k} \beta_{k-Z_K} + C_{K_2} \frac{\beta_k}{\alpha_k} \alpha_{k-Z_K} \right). \end{aligned}$$

971 The term  $\frac{2}{K} \sum_{k=0}^K M_{k_1}$  has been bounded in (124). Let  $\alpha_k = \frac{\bar{\alpha}}{\sqrt{K}}$  for some positive constant  $\bar{\alpha}$ ,

972  $\beta_k = \frac{C_9}{2\lambda_\phi} \alpha_k$  will yield the desired rate.

## 973 **F Natural AC variant and its convergence**

974 In this section, we propose a natural Actor-Critic variant of Algorithm 1, where the approach of  
 975 calculating the natural policy gradient under the decentralized setting is mainly inspired by [6]. We  
 976 show that the gradient norm square of such an algorithm will convergence with the optimal sample  
 977 complexity of  $\tilde{\mathcal{O}}(\varepsilon^{-3})$ . Moreover, the algorithm will converge to the *global optimum* with the sample  
 978 complexity of  $\tilde{\mathcal{O}}(\varepsilon^{-4})$ . In the rest of this section, we first explain the update of the algorithm, and  
 979 then prove its convergence.

### 980 **F.1 Decentralized natural Actor-Critic**

981 The natural policy gradient (NPG) algorithm [12] can be viewed as a preconditioned policy gradient  
 982 algorithm, which updates as follow:

$$\theta_{k+1} = \theta_k - \alpha_k F(\theta_k)^{-1} \nabla J(\theta_k), \quad (131)$$

983 where  $F(\theta) := \mathbb{E}_{s \sim d_{\pi_\theta}, a \sim \pi_\theta} [\psi_\theta(s, a) \psi_\theta(s, a)^T]$  is the Fisher information matrix (FIM).<sup>3</sup> The  
 984 natural Actor-Critic (NAC) uses the critic variable to estimate the gradient. The main challenge  
 985 for implementing NAC lies in the estimation of the inverse matrix-vector product  $F(\theta_k)^{-1} \nabla J(\theta_k)$ ,

<sup>3</sup>Throughout the discussion, we assume that FIM is invertible and thus positive-definite.

---

**Algorithm 3:** Decentralized single-timescale NAC
 

---

1: **Initialize:** Actor parameter  $\theta_0$ , critic parameter  $\omega_0$ , reward estimator parameter  $\lambda_0$ , initial state  $s_0$ , natural policy gradient estimation  $h_{k,0}$ .  
 2: **for**  $k = 0, \dots, K - 1$  **do**  
 3:   **Option 1: i.i.d. sampling:**  
 4:    $s_k \sim \mu_{\theta_k}(\cdot), a_k \sim \pi_{\theta_k}(\cdot|s_k), s_{k+1} \sim \mathcal{P}(\cdot|s_k, a_k)$ .  
 5:   **Option 2: Markovian sampling:**  
 6:    $a_k \sim \pi_{\theta_k}(\cdot|s_k), s_{k+1} \sim \mathcal{P}(\cdot|s_k, a_k)$ .  
 7:  
 8:   **Periodical consensus:** Compute  $\tilde{\omega}_k^i$  and  $\tilde{\lambda}_k^i$  by (4) and (7).  
 9:  
 10:   **for**  $i = 0, \dots, N$  **in parallel do**  
 11:     **Reward estimator update:** Update  $\lambda_{k+1}^i$  by (8).  
 12:     **Critic update:** Update  $\omega_{k+1}^i$  by (5).  
 13:     **Actor update:**  
 14:       Collect  $N_a$  transition samples based on Markovian/i.i.d sampling.  
 15:       **for**  $k' = 1, \dots, K_a$  **do**  
 16:         Estimate  $\bar{z}_{k',n}, \forall n \in [N_a]$  using (133).  
 17:         Update  $h_{k,k'+1}$  by (135).  
 18:       **end for**  
 19:       Update  $\theta_{k+1}^i$  by (136).  
 20:     **end for**  
 21: **end for**

---

986 especially under the decentralized setting. The work [6] proposes to solve the following strongly  
 987 convex problem in order to estimate the product in a decentralized way

$$h(\theta_k) = \arg \min_h f_{\theta_k}(h) := \frac{1}{2} h^T F(\theta_k) h - \nabla J(\theta_k)^T h. \quad (132)$$

988 Such a problem can be solved by using (stochastic) gradient descent, where the gradient is calculated  
 989 by  $F(\theta_k)h - \nabla J(\theta_k)$ . For the centralized setting, the gradient w.r.t. each agent can be approximated  
 990 as  $\frac{1}{N_a} \sum_{n=1}^{N_a} \psi_{\theta_k}^i(s_n, a_n) \psi_{\theta_k}(s_n, a_n)^T h - g_a^i(\xi_n, \omega_{k+1}, \lambda_{k+1})$ . However, when considering the  
 991 decentralized setting, the term  $\bar{z}_n := \psi_{\theta_k}(s_n, a_n)^T h = \sum_{i=1}^N \psi_{\theta_k}^i(s_n, a_n)^T h^i$  is not accessible for  
 992 each agent. Therefore, to approximate this value, agents compute  $z_{n,0}^i := \psi_{\theta_k}^i(s_n, a_n)^T h^i$  locally  
 993 and then perform the following communication step for  $K_z$  steps

$$z_{n,k'+1}^i = \sum_{j=1}^N W^{ij} z_{n,k'}^j, \forall n \in [N_a], k' = 0, \dots, K_z - 1. \quad (133)$$

994 As we will see,  $N z_{n,k'}^i$  converges to  $\bar{z}_n$  linearly. Thus, the gradient of agent  $i$  can be approximated as

$$\tilde{\nabla} f_{\theta_k}^i(h_{k,k'}) := \frac{N}{N_a} \sum_{n=1}^{N_a} \psi_{\theta_k}^i(s_n, a_n) z_{n,K_z}^i - g_a^i(\xi_k, \omega_{k+1}, \lambda_{k+1}). \quad (134)$$

995 Then, each agent  $i$  performs the following update for  $K_a$  steps to estimate the natural policy gradient  
 996 direction as

$$h_{k,k'+1}^i = \Pi_{C_h}(h_{k,k'}^i - \varrho \tilde{\nabla} f_{\theta_k}^i(h_{k,k'})), \quad (135)$$

997 where  $\varrho$  is a positive constant step size. Since the norm of optimal direction is bounded by  $C_h :=$   
 998  $\lambda_{\max}(F(\theta)^{-1})C_\theta$ , we project the vector into a ball of norm  $C_h$  for each update. Finally, we perform  
 999 the approximate natural policy gradient step as

$$\theta_{k+1}^i = \theta_k^i - \alpha_k h_{k,K_a}^i. \quad (136)$$

## 1000 F.2 Convergence of natural Actor-Critic

1001 In this section, we establish the sample complexity of Algorithm 3. We first introduce an additional  
 1002 assumption.

1003 **Assumption 6.** (invertible FIM) There exists a positive constant  $\lambda_F$  such that for all policy  $\theta$ ,  
 1004  $\lambda_{\min}(F(\theta)) \geq \lambda_F$ .

1005 Assumption 6 ensures that  $F(\theta)$  is positive definite so that the problem (132) is strongly convex.  
 1006 Such an assumption is commonly adopted; see [6, 36, 17].

1007 We now show the sample complexity of the Algorithm 3 in terms of gradient norm square and the  
 1008 global optimal gap. We consider the i.i.d. sampling to simplify the proof. We remark that the proof  
 1009 for Markovian sampling follows the similar analysis, with additional  $\mathcal{O}(\log(\varepsilon^{-1}))$  error terms caused  
 1010 by Markov chain mixing.

1011 **Theorem 4.** Suppose Assumptions 1-6 hold. Consider the update of Algorithm 3 under i.i.d. sampling.  
 1012 Let  $\alpha_k = \frac{\bar{\alpha}}{\sqrt{K}}$  for some positive constant  $\bar{\alpha}$ ,  $\beta_k = \frac{C_a}{2\lambda_\phi} \alpha_k$ ,  $\varrho \leq \frac{1}{2C_\psi^2}$ ,  $N_a = \mathcal{O}(\sqrt{K})$ ,  $K_a =$   
 1013  $\mathcal{O}(\log(K^{1/2}))$ ,  $K_c = \mathcal{O}(\log(K^{1/4}))$ . Then, the following hold

$$\frac{1}{K} \sum_{k=1}^K \sum_{i=1}^N \mathbb{E} [\|\nabla_{\theta^i} F(\theta_k)\|^2] \leq \mathcal{O}\left(\frac{1}{\sqrt{K}}\right) + \mathcal{O}(\varepsilon_{app} + \varepsilon_{sp}) \quad (137)$$

$$\frac{1}{K} \sum_{k=0}^K J(\theta^*) - J(\theta_k) \leq \mathcal{O}\left(\frac{1}{K^{1/4}}\right) + \mathcal{O}(\varepsilon_{app} + \varepsilon_{sp} + \varepsilon_{actor}). \quad (138)$$

1014 Based on Theorem 4, Algorithm 3 needs  $K = \mathcal{O}(\varepsilon^{-2})$  iterations to achieve  $\varepsilon$ -error for gradient norm  
 1015 square, and thus attains sample complexity of  $KN_aK_a = \tilde{\mathcal{O}}(\varepsilon^{-3})$ , which matches the best existing  
 1016 sample complexity of NAC [35, 6]. In terms of the global optimality gap, the algorithm requires  
 1017  $K = \mathcal{O}(\varepsilon^{-4})$  iterations to achieve  $\varepsilon$ -error, and thus has  $KN_aK_a = \tilde{\mathcal{O}}(\varepsilon^{-6})$  sample complexity.  
 1018 Such a sample complexity is much worse than the best existing sample complexity of  $\tilde{\mathcal{O}}(\varepsilon^{-3})$  [35, 6].

1019 We now explain the intuition of the gap for the sample complexity. Mimicking the analysis of [6]  
 1020 allows to establish the following inequality

$$\begin{aligned} \frac{1}{K} \sum_{k=0}^K J(\theta^*) - \mathbb{E}[J(\theta_k)] &\leq \mathcal{O}\left(\frac{1}{K} \sum_{k=1}^K \sum_{i=1}^N \mathbb{E}[\|\nabla_{\theta^i} J(\theta_k)\|^2]\right) \\ &\quad + \mathcal{O}\left(\frac{1}{K} \sum_{k=1}^K \sum_{i=1}^N \|\omega_k^i - \omega^*(\theta_k)\|\right) + \mathcal{O}\left(\frac{1}{K\alpha_k}\right). \end{aligned}$$

1021 While our analysis can obtain the iteration complexity of  $\mathcal{O}(\frac{1}{\sqrt{K}})$  for  $\|\nabla J(\theta_k)\|^2$ , we can only achieve  
 1022  $\mathcal{O}(\frac{1}{K^{1/4}})$  iteration complexity for critic's error  $\|\omega_k - \omega^*(\theta_k)\|$ . This is because our algorithm uses  
 1023 single-timescale update, where the critic's error inevitably converges slower than that of double-loop  
 1024 based algorithms which have  $\mathcal{O}(\frac{1}{\sqrt{K}})$  complexity for the critic's error at each iteration. Therefore,  
 1025 the sample complexity in terms of global optimality gap of our single-timescale NAC is dominated  
 1026 by this critic's error term, resulting in the final complexity of  $\tilde{\mathcal{O}}(\varepsilon^{-6})$ .

1027 We remark that this sample complexity result is based on a straightforward application of the analysis  
 1028 of [6], which is designed for double-loop algorithm. Therefore, such a proof technique may not be the  
 1029 tightest one for our single-timescale NAC (intuitively, the result is not tight). We leave the research  
 1030 on the improvement of such highly suboptimal results of single-timescale NAC as a future work.

### 1031 E.3 Proof of Theorem 4

1032 By Lemma 4, we have

$$\begin{aligned} \mathbb{E}[J(\theta_{k+1})] - J(\theta_k) &\geq \sum_{i=1}^N \mathbb{E}\langle \nabla_{\theta^i} J(\theta_k), \theta_{k+1}^i - \theta_k^i \rangle - \frac{L}{2} \sum_{i=1}^N \|\theta_{k+1}^i - \theta_k^i\|^2 \\ &\stackrel{(i)}{\geq} \sum_{i=1}^N \alpha_k \mathbb{E}\langle \nabla_{\theta^i} J(\theta_k), h_k^i \rangle - \frac{L}{2} NC_h^2 \alpha_k^2 \end{aligned}$$



$$\begin{aligned}
&= \sum_{i=1}^N [\alpha_k \mathbb{E} \langle \nabla_{\theta^i} J(\theta_k), F(\theta_k)^{-1} g_a^i(\xi_k, \omega_{k+1}^i, \lambda_{k+1}^i) \rangle \\
&\quad + \alpha_k \mathbb{E} \langle \nabla_{\theta^i} J(\theta_k), h_k^i - F(\theta_k)^{-1} g_a^i(\xi_k, \omega_{k+1}^i, \lambda_{k+1}^i) \rangle] - \frac{L}{2} N C_h^2 \alpha_k^2 \\
&\stackrel{(ii)}{=} \sum_{i=1}^N [\alpha_k \mathbb{E} \langle F(\theta_k)^{-1/2} \nabla_{\theta^i} J(\theta_k), F(\theta_k)^{-1/2} g_a^i(\xi_k, \omega_{k+1}^i, \lambda_{k+1}^i) \rangle \\
&\quad + \alpha_k \mathbb{E} \langle \nabla_{\theta^i} J(\theta_k), h_k^i - F(\theta_k)^{-1} g_a^i(\xi_k, \omega_{k+1}^i, \lambda_{k+1}^i) \rangle] - \frac{L}{2} N C_h^2 \alpha_k^2 \\
&= \sum_{i=1}^N \left[ \frac{\alpha_k}{2} \|F(\theta_k)^{-1/2} \nabla_{\theta^i} J(\theta_k)\|^2 + \frac{\alpha_k}{2} \|F(\theta_k)^{-1/2} \mathbb{E}[g_a^i(\xi_k, \omega_{k+1}^i, \lambda_{k+1}^i)]\|^2 \right. \\
&\quad \left. - \frac{\alpha_k}{2} \|F(\theta_k)^{-1/2} \nabla_{\theta^i} J(\theta_k) - F(\theta_k)^{-1/2} \mathbb{E}[g_a^i(\xi_k, \omega_{k+1}^i, \lambda_{k+1}^i)]\|^2 \right. \\
&\quad \left. + \alpha_k \mathbb{E} \langle \nabla_{\theta^i} J(\theta_k), h_k^i - F(\theta_k)^{-1} g_a^i(\xi_k, \omega_{k+1}^i, \lambda_{k+1}^i) \rangle \right] - \frac{L}{2} N C_\theta^2 \alpha_k^2 \\
&\stackrel{(iii)}{\geq} \sum_{i=1}^N \left[ \frac{\alpha_k}{4} C_\psi^{-2} \|\nabla_{\theta^i} J(\theta_k)\|^2 + \frac{\alpha_k}{2} \lambda_F \|F(\theta_k)^{-1} \mathbb{E}[g_a^i(\xi_k, \omega_{k+1}^i, \lambda_{k+1}^i)]\|^2 \right. \\
&\quad \left. - \frac{\alpha_k}{2} \lambda_F^{-1} \underbrace{\|\nabla_{\theta^i} J(\theta_k) - \mathbb{E}[g_a^i(\xi_k, \omega_{k+1}^i, \lambda_{k+1}^i)]\|^2}_{I_1} \right. \\
&\quad \left. - \alpha_k C_\psi^2 \underbrace{\|\mathbb{E}[h_k^i] - F(\theta_k)^{-1} \mathbb{E}[g_a^i(\xi_k, \omega_{k+1}^i, \lambda_{k+1}^i)]\|^2}_{I_2} \right] - \frac{L}{2} N C_\theta^2 \alpha_k^2,
\end{aligned} \tag{139}$$

1033 where (i) is due to  $\|\theta_{k+1}^i - \theta_k^i\| \leq C_h := \lambda_F C_\theta$ . Note that we use  $h_{k,K_a}^i$  for  
1034 simplifying the notation. (ii) uses decomposition of positive definite (PD) matrix. Specifically,  
1035 let  $A$  be PD matrix, then by eigenvalue decomposition,  $A = V \Lambda V^T$  for some orthonormal matrix  
1036  $V$ . Define  $A^{-1/2} := V \Lambda^{1/2} V^T$ , then  $\langle x, Ay \rangle = \langle A^{1/2} x, A^{1/2} y \rangle$  for any  $x$  and  $y$ . (iii) uses  
1037  $\lambda_F \leq \lambda(F(\theta)) \leq C_\psi^2, \forall \theta$ .

1038  $I_1$  represents the error of gradient bias, which we have bounded when analyzing the error of AC. By  
1039 (96), we have

$$I_1 \leq 16(\varepsilon_{sp} + C_\psi^2 \varepsilon_{app}) + 16C_\psi^2 \|\omega^*(\theta_k) - \omega_{k+1}^i\|^2 + 8C_\psi^2 \|\lambda^*(\theta_k) - \lambda_{k+1}^i\|^2. \tag{140}$$

1040 To bound  $I_2$ , we need to bound the error of  $h_{k,k'}$ . We start with the gradient bias when estimating  
1041  $h_{k,k'}$ . Define  $\bar{\nabla} f_{k,k'}(h_{k,k'}) := \nabla F(\theta_k) h_{k,k'} - \mathbb{E}[g_a(\xi_k, \omega_{k+1}^i, \lambda_{k+1}^i)]$ , then it is easy to see that  
1042  $\bar{\nabla} f_{k,k'}(h_{k,k'})$  is the unbiased gradient of the following problem

$$\frac{1}{2} h_{k,k'}^T \nabla F(\theta_k) h_{k,k'} - \mathbb{E}[g_a(\xi_k, \omega_{k+1}^i, \lambda_{k+1}^i)]^T h_{k,k'}.$$

1043 Define the following notation for the ease of expression

$$\begin{aligned}
\widehat{\nabla} f_{k,k'}^i(h_{k,k'}) &:= \frac{1}{N_a} \sum_{n=1}^{N_a} \psi_{\theta_k^i}(s_n, a_n^i) \psi_{\theta_k}(s_n, a_n)^T h_{k,k'} - g_a^i(\xi_{k,k'}, \omega_{k+1}^i, \lambda_{k+1}^i) \\
\widehat{\nabla} f_{k,k'}(h_{k,k'}) &:= [\widehat{\nabla} f_{k,k'}^1(h_{k,k'}), \dots, \widehat{\nabla} f_{k,k'}^N(h_{k,k'})] \\
\widetilde{\nabla} f_{k,k'}^i(h_{k,k'}) &:= \frac{N}{N_a} \sum_{n=1}^{N_a} \psi_{\theta_k^i}(s_n, a_n^i) z_{n,K_z}^i - g_a^i(\xi_{k,k'}, \omega_{k+1}^i, \lambda_{k+1}^i) \\
\widetilde{\nabla} f_{k,k'}(h_{k,k'}) &:= [\widetilde{\nabla} f_{k,k'}^1(h_{k,k'}), \dots, \widetilde{\nabla} f_{k,k'}^N(h_{k,k'})].
\end{aligned}$$

1044 We now analyze the error at outer-loop iteration  $k$ . For notational simplicity, we omit the subscript  
1045  $k$  for the prementioned notations, e.g. we use  $\widehat{\nabla} f_{k'}^i(h_{k'})$ ,  $\widehat{\nabla} f_{k'}(h_{k'})$ ,  $\widetilde{\nabla} f_{k'}^i(h_{k'})$ ,  $\widetilde{\nabla} f_{k'}(h_{k'})$  to  
1046 represent the above notations, respectively.

$$\|\bar{\nabla} f_{k'}(h_{k'}) - \tilde{\nabla} f_{k'}(h_{k'})\|^2 \leq 2 \underbrace{\|\bar{\nabla} f_{k'}(h_{k'}) - \widehat{\nabla} f_{k'}(h_{k'})\|^2}_{I_3} + 2 \underbrace{\|\widehat{\nabla} f_{k'}(h_{k'}) - \tilde{\nabla} f_{k'}(h_{k'})\|^2}_{I_4}.$$

1047  $I_3$  can be bounded as

$$\begin{aligned} I_3 &= \left\| \sum_{n=1}^{N_a} \left( \frac{1}{N_a} \psi_\theta(s_n, a_n) \psi_\theta(s_n, a_n)^T - F(\theta) \right) h_{k'} \right\|^2 \\ &\leq \left\| \sum_{n=1}^{N_a} \left( \frac{1}{N_a} \psi_\theta(s_n, a_n) \psi_\theta(s_n, a_n)^T - F(\theta) \right) \right\|^2 C_h^2 \\ &\leq \frac{1}{N_a} C_\psi^4 C_h^2. \end{aligned} \quad (141)$$

1048  $I_4$  can be bounded as

$$\begin{aligned} I_4 &= \sum_{i=1}^N \left\| \psi_{\theta^i}(s_n, a_n^i) \left( \frac{1}{N_a} \sum_{n=1}^{N_a} N z_{n, K_z}^i - \psi_\theta(s_n, a_n)^T h_{k'} \right) \right\|^2 \\ &\leq \frac{1}{N_a} N C_\psi^2 \sum_{i=1}^N \sum_{n=1}^{N_a} \|z_{n, K_z}^i - \bar{z}_{n, K_z}\|^2 \\ &= \frac{N C_\psi^2}{N_a} \sum_{n=1}^{N_a} \|QW^{K_z} z_{n, 0}\|^2 \\ &\leq \frac{N C_\psi^2}{N_a} \sum_{n=1}^{N_a} \nu^{K_z} \|z_{n, 0}\|^2 \leq N C_\psi^4 C_h^2 \nu^{K_z}. \end{aligned} \quad (142)$$

1049 Let  $K_z = \min\{c \in \mathbb{N}^+ | \nu^c \leq \frac{4}{N_a N}\}$ , then  $K_z = \mathcal{O}(\log \frac{1}{N_a})$ . Combine (141) and (142) gives us

$$\|\bar{\nabla} f_{k'}(h_{k'}) - \tilde{\nabla} f_{k'}(h_{k'})\|^2 \leq \frac{4 C_\psi^4 C_h^2}{N_a}.$$

1050 We now analyze the error of  $h_{k, k'}$ . Note that we omit the subscript  $k$  here for simplifying notation.

1051 Define

$$h^* = \arg \min_h \bar{f}_\theta(h) := h^T F(\theta) h := -\mathbb{E}_{\xi \sim \mu_\theta} [g_\alpha(\xi, \omega, \lambda)]^T h. \quad (143)$$

1052 It is easy to see that the function on the RHS is strongly convex, since  $F(\theta)$  is positive definite w.r.t.

1053  $h$ . We bound the optimal gap by

$$\begin{aligned} \mathbb{E}\|h_{k'+1} - h^*\|^2 &= \mathbb{E}\|h_{k'} - \varrho \tilde{\nabla} f_{k'}(h_{k'}) - h^*\|^2 \\ &= \mathbb{E}\|h_{k'} - h^*\|^2 - 2\varrho \mathbb{E}\langle h_{k'} - h^*, \tilde{\nabla} f_{k'}(h_{k'}) \rangle + \varrho^2 \|\tilde{\nabla} f_{k'}(h_{k'})\|^2 \\ &\leq \mathbb{E}\|h_{k'} - h^*\|^2 - 2\varrho \mathbb{E}\langle h_{k'} - h^*, \bar{\nabla} f_{k'}(h_{k'}) \rangle + 2\varrho \mathbb{E}\langle h_{k'} - h^*, \bar{\nabla} f_{k'}(h_{k'}) - \tilde{\nabla} f_{k'}(h_{k'}) \rangle \\ &\quad + 2\varrho^2 \|\bar{\nabla} f_{k'}(h_{k'})\|^2 + 2\varrho^2 \|\tilde{\nabla} f_{k'}(h_{k'}) - \bar{\nabla} f_{k'}(h_{k'})\|^2 \\ &\stackrel{(i)}{\leq} (1 - \varrho \lambda_F) \mathbb{E}\|h_{k'} - h^*\|^2 - 2\varrho (f_{k'}(h_{k'}) - \bar{f}^*) + 2\varrho \mathbb{E}\langle h_{k'} - h^*, \bar{\nabla} f_{k'}(h_{k'}) - \tilde{\nabla} f_{k'}(h_{k'}) \rangle \\ &\quad + 2\varrho^2 \|\bar{\nabla} f_{k'}(h_{k'})\|^2 + 2\varrho^2 \|\tilde{\nabla} f_{k'}(h_{k'}) - \bar{\nabla} f_{k'}(h_{k'})\|^2 \\ &\stackrel{(ii)}{\leq} (1 - \varrho \lambda_F) \mathbb{E}\|h_{k'} - h^*\|^2 - 2\varrho (1 - 2\varrho C_\psi^2) (f_{k'}(h_{k'}) - \bar{f}^*) \\ &\quad + 2\varrho \mathbb{E}\langle h_{k'} - h^*, \bar{\nabla} f_{k'}(h_{k'}) - \tilde{\nabla} f_{k'}(h_{k'}) \rangle + 2\varrho^2 \|\tilde{\nabla} f_{k'}(h_{k'}) - \bar{\nabla} f_{k'}(h_{k'})\|^2 \\ &\stackrel{(iii)}{\leq} (1 - \varrho \lambda_F) \mathbb{E}\|h_{k'} - h^*\|^2 + 2\varrho \mathbb{E}\langle h_{k'} - h^*, \bar{\nabla} f_{k'}(h_{k'}) - \tilde{\nabla} f_{k'}(h_{k'}) \rangle \\ &\quad + 2\varrho^2 \|\tilde{\nabla} f_{k'}(h_{k'}) - \bar{\nabla} f_{k'}(h_{k'})\|^2 \\ &\stackrel{(iiii)}{\leq} \left(1 - \frac{\varrho \lambda_F}{2}\right) \mathbb{E}\|h_{k'} - h^*\|^2 + \left(\frac{2\varrho}{\lambda_F} + 2\varrho^2\right) \|\tilde{\nabla} f_{k'}(h_{k'}) - \bar{\nabla} f_{k'}(h_{k'})\|^2, \end{aligned}$$

1054 where  $\bar{f}^*$  is the optimal value of  $\bar{f}(h)$  defined in (143), and the inequality follows the property of  
 1055  $\lambda_F$ -strongly convex function:  $\bar{f}(h_2) \geq \bar{f}(h_1) + \langle \nabla \bar{f}(h_1), h_2 - h_1 \rangle + \frac{\lambda_F}{2} \|h_1 - h_2\|^2$ ,  $\forall h_1, h_2$ . (ii)  
 1056 uses the PL condition implied by  $\lambda_F$ -strong convexity:  $\bar{f}(h^*) - \bar{f}(h) \leq -\frac{1}{2\lambda_F} \|\nabla \bar{f}(h)\|^2$ ,  $\forall h$ . (iii)  
 1057 is due to step size rule that  $\varrho \leq \frac{1}{2C_\psi^2}$ . (iiii) applies Young's inequality.

1058 Use the above induction, we have

$$\begin{aligned} \mathbb{E}\|h_{K_a} - h^*\|^2 &\leq (1 - \frac{\varrho\lambda_F}{2})^{K_a} \|h_0 - h^*\|^2 + \sum_{t=0}^{K_a} (1 - \frac{\varrho\lambda_F}{2})^t (\frac{2\varrho}{\lambda_F} + 2\varrho^2) \|\bar{\nabla} f_{K_a-t}(h_{K_a}) - \tilde{\nabla} f_{K_a}(h_{K_a})\|^2 \\ &\leq 4C_h^2 (1 - \frac{\varrho\lambda_F}{2})^{K_a} + (\frac{4\varrho}{\varrho\lambda_F^2} + \frac{4\varrho}{\lambda_F}) C_\psi^4 C_h^2 \frac{4}{N_a}. \end{aligned}$$

1059 Let  $K_a = \min\{c \in \mathbb{N}^+ | 4C_h^2(1 - \frac{\varrho\lambda_F}{2})^c = (\frac{4\varrho}{\varrho\lambda_F^2} + \frac{4\varrho}{\lambda_F}) C_\psi^4 C_h^2 \frac{1}{N_a}\}$ , then  $K_a = \mathcal{O}(\log(\frac{1}{N_a}))$ . Define  
 1060  $C_{18} := (\frac{16\varrho}{\varrho\lambda_F^2} + \frac{16\varrho}{\lambda_F}) C_\psi^4 C_h^2$ , we have

$$I_2 = \mathbb{E}\|h_{K_a} - h^*\|^2 \leq \frac{2C_{18}}{N_a}. \quad (144)$$

1061 Plug (140) and (144) back to (139), we have

$$\begin{aligned} \mathbb{E}[J(\theta_{k+1})] - J(\theta_k) &\geq \sum_{i=1}^N [\frac{\alpha_k}{4} C_\psi^{-2} \|\nabla_{\theta^i} J(\theta_k)\|^2 + \frac{\alpha_k}{2} \lambda_F \|F(\theta_k)^{-1} \mathbb{E}[g_a^i(\xi_k, \omega_{k+1}^i, \lambda_{k+1}^i)]\|^2 + \alpha_k C_\psi^2 \frac{2C_{18}}{N_a} \\ &\quad + 8\lambda_F^{-1} (\varepsilon_{sp} + C_\psi^2 \varepsilon_{app}) + 8\lambda_F^{-1} C_\psi^2 \|\omega^*(\theta_k) - \omega_{k+1}^i\|^2 + 4\lambda_F^{-1} C_\psi^2 \|\lambda^*(\theta_k) - \lambda_{k+1}^i\|^2] \end{aligned}$$

1062 Consider the Lyapunov function

$$\mathbb{V}^k = -J(\theta_k) + \lambda_F^{-1} (\|\omega_k - \omega^*(\theta_k)\|^2 + \|\lambda_k - \lambda^*(\theta_k)\|^2).$$

1063 The difference of the Lyapunov function is

$$\begin{aligned} \mathbb{E}[\mathbb{V}^{k+1}] - \mathbb{E}[\mathbb{V}^k] &= \mathbb{E}[J(\theta_k)] - \mathbb{E}[J(\theta_{k+1})] + \lambda_F^{-1} (\mathbb{E}\|\omega_{k+1} - \omega^*(\theta_{k+1})\|^2 - \mathbb{E}\|\omega_k - \omega^*(\theta_k)\|^2 \\ &\quad + \mathbb{E}\|\lambda_{k+1} - \lambda^*(\theta_{k+1})\|^2 - \mathbb{E}\|\lambda_k - \lambda^*(\theta_k)\|^2) \\ &\leq \sum_{i=1}^N \left[ \frac{\alpha_k}{4} C_\psi^{-2} \mathbb{E}\|\nabla_{\theta^i} J(\theta_k)\|^2 + \frac{\alpha_k}{2} \lambda_F \|F(\theta_k)^{-1} \mathbb{E}[g_a^i(\xi_k, \omega_{k+1}^i, \lambda_{k+1}^i)]\|^2 + \alpha_k C_\psi^2 \frac{2C_{18}}{N_a} \right] \\ &\quad + \lambda_F^{-1} \underbrace{\left[ \sum_{i=1}^N 8C_\psi^2 \alpha_k \mathbb{E}\|\omega^*(\theta_k) - \omega_{k+1}^i\|^2 + \mathbb{E}\|\bar{\omega}_{k+1} - \omega^*(\theta_{k+1})\|^2 - \mathbb{E}\|\bar{\omega}_k - \omega^*(\theta_k)\|^2 \right]}_{I_5} \\ &\quad + \lambda_F^{-1} \underbrace{\left[ \sum_{i=1}^N 4C_\psi^2 \alpha_k \mathbb{E}\|\lambda^*(\theta_k) - \lambda_{k+1}^i\|^2 + \mathbb{E}\|\bar{\lambda}_{k+1} - \lambda^*(\theta_{k+1})\|^2 - \mathbb{E}\|\bar{\lambda}_k - \lambda^*(\theta_k)\|^2 \right]}_{I_6} \\ &\quad + 8N\lambda_F^{-1} (\varepsilon_{sp} + C_\psi^2 \varepsilon_{app}). \end{aligned} \quad (145)$$

1064 By following the similar procedures through (98) to (106), we can bound  $I_5$  and  $I_6$  as

$$I_5 \leq (1 + C_{19}\alpha_k) C_\delta^2 \beta_k^2 + \frac{\alpha_k}{4} \lambda_F^{-1} \sum_{i=1}^N \mathbb{E}\|F(\theta_k)^{-1} g_a^i(\xi_k, \omega_{k+1}^i, \lambda_{k+1}^i)\|^2 + \alpha_k M_{k_1} + C_{20}\alpha_k^2 \quad (146)$$

$$I_6 \leq (1 + C_{21}\alpha_k) C_\lambda^2 \eta_k^2 + \frac{\alpha_k}{4} \lambda_F^{-1} \sum_{i=1}^N \mathbb{E}\|F(\theta_k)^{-1} g_a^i(\xi_k, \omega_{k+1}^i, \lambda_{k+1}^i)\|^2 + \alpha_k M_{k_2} + C_{22}\alpha_k^2, \quad (147)$$

1065 where  $C_{19}, C_{20}, C_{21}, C_{22}$  are some positive constants. Plug (146) and (147) back to (145), we have

$$\begin{aligned} \mathbb{E}[\mathbb{V}^{k+1}] - \mathbb{E}[\mathbb{V}^k] &\leq \sum_{i=1}^N \left[ \frac{\alpha_k}{4} C_\psi^{-2} \mathbb{E} \|\nabla_{\theta^i} J(\theta_k)\|^2 + \alpha_k C_\psi^2 \frac{2C_{18}}{N_a} + \mathcal{O}(\alpha_k^2 + \beta_k^2 + \eta_k^2) \right. \\ &\quad \left. + (M_{k_1} + M_{k_2})\alpha_k + \mathcal{O}(\varepsilon_{sp} + \varepsilon_{app})\alpha_k \right]. \end{aligned} \quad (148)$$

1066 By telescoping (148), we can get

$$\begin{aligned} \frac{1}{K} \sum_{k=0}^K \sum_{i=1}^N \mathbb{E} \|\nabla_{\theta^i} J(\theta_k)\|^2 &\leq \frac{4C_\psi^2 \mathbb{V}_0}{K\alpha_k} + \mathcal{O}(\varepsilon_{sp} + \varepsilon_{app}) + \frac{8C_\psi^2 C_{18}}{N_a} + \mathcal{O}\left(\alpha_k + \frac{\beta_k^2}{\alpha_k} + \frac{\eta_k^2}{\alpha_k}\right) \\ &\quad + 4C_\psi^2 (M_{k_1} + M_{k_2}) \end{aligned}$$

1067 By (108),  $M_{k_1} + M_{k_2} = \mathcal{O}(\frac{1}{\sqrt{K}})$  when  $K_c \leq \mathcal{O}(K^{1/4})$ . Therefore, let  $C, \bar{\alpha}$  be some positive  
1068 constants. Set  $N_a = C\sqrt{K}$ ,  $\alpha_k = \frac{\bar{\alpha}}{\sqrt{K}}$ ,  $\beta_k = \frac{C_9}{2\lambda_\varphi} \alpha_k$ ,  $\eta_k = \frac{C_{10}}{2\lambda_\varphi} \alpha_k$ , we obtain the desired result of  
1069 (137).

1070 We now prove (138). Let  $\mathbb{E}_{\theta^*}$  denote the expectation over  $s \sim d_{\pi_{\theta^*}}$ ,  $a \sim \pi_{\theta^*}(\cdot|s)$ . We begin with the  
1071 descent of policy gap as

$$\begin{aligned} &\mathbb{E}_{\theta^*} [\log \pi_{\theta_{k+1}}(a|s) - \log \pi_{\theta_k}(a|s)] \\ &\geq \alpha_k \mathbb{E}_{\theta^*} [\psi_{\theta_k}(s, a)^T h_k] - \frac{L_\psi \alpha_k^2}{2} C_h^2 \\ &\geq \alpha_k \mathbb{E}_{\theta^*} [\psi_{\theta_k}(s, a)^T (h_k - h^*(\theta_k))] + \alpha_k \mathbb{E}_{\theta^*} [\psi_{\theta_k}(s, a)^T h^*(\theta_k) - A_{\theta_k}(s, a)] \\ &\quad + \alpha_k \mathbb{E}_{\theta^*} [A_{\theta_k}(s, a)] - \frac{L_\psi \alpha_k^2}{2} C_h^2 \\ &\geq -\alpha_k C_\psi \|h_k - h^*(\theta_k)\| - \alpha_k \sqrt{\varepsilon_{actor}} + \alpha_k (J(\theta^*) - J(\theta_k)) - \frac{L_\psi \alpha_k^2}{2} C_h^2. \end{aligned}$$

1072 By telescoping the above inequality and rearranging terms, we have

$$\begin{aligned} \frac{1}{K} \sum_{k=1}^K (J(\theta^*) - J(\theta_k)) &\leq \frac{1}{K\alpha_k} \mathbb{E}_{\theta^*} [\log \pi_K(a|s) - \log \pi_0(a|s)] + \sqrt{\varepsilon_{actor}} \\ &\quad + \frac{1}{K} \sum_{k=1}^K C_\psi \|h_k - h^*(\theta_k)\| + \frac{1}{K} \sum_{k=1}^K \frac{L_\psi \alpha_k}{2}. \end{aligned}$$

1073 The term  $\|h_k - h^*(\theta_k)\| \leq \|h_k - F(\theta_k)^{-1} \mathbb{E}[g_a(\xi_k, \omega_{k+1}, \lambda_{k+1})]\| + \|\mathbb{E}[g_a(\xi_k, \omega_{k+1}, \lambda_{k+1}) -$   
1074  $F^{-1} \nabla J(\theta_k)]\|$ . Since by the (144) and (96), these two terms are of order  $\mathcal{O}(\frac{1}{N_a^{1/2}})$  and  $\mathcal{O}(\|\omega_k -$   
1075  $\omega_{k+1}\| + \varepsilon_{app})$ , respectively, we conclude that  $\|h_k - h^*(\theta_k)\|$  is of order  $\mathcal{O}(\|\omega_k - \omega^*(\theta_k)\| + \varepsilon_{app})$ .  
1076 By following the step size rule as suggested by Theorem 4, we obtain the desired result.

## 1077 G Overview of communication complexity

1078 The Table 1 compares related works in terms of sample complexity and communication complexity.

| Setting          | Paper            | Update                  | Sampling  | Sample complexity                                 | Communication complexity                          |
|------------------|------------------|-------------------------|-----------|---------------------------------------------------|---------------------------------------------------|
| Single-agent AC  | [32]             | Two-timescale           | Markovian | $\tilde{\mathcal{O}}(\varepsilon^{-\frac{5}{2}})$ | -                                                 |
|                  | [35]             | Double-loop             | Markovian | $\tilde{\mathcal{O}}(\varepsilon^{-2})$           | -                                                 |
| Decentralized AC | [42]             | Two-timescale           | Markovian | Asymptotic                                        | -                                                 |
|                  | [38]             | Two-timescale           | i.i.d.    | $\mathcal{O}(\varepsilon^{-\frac{5}{2}})$         | $\mathcal{O}(\varepsilon^{-\frac{5}{2}})$         |
|                  | [6]              | Double-loop             | Markovian | $\tilde{\mathcal{O}}(\varepsilon^{-2})$           | $\tilde{\mathcal{O}}(\varepsilon^{-1})$           |
|                  | [11]             | Double-loop             | Markovian | $\tilde{\mathcal{O}}(\varepsilon^{-2})$           | $\tilde{\mathcal{O}}(\varepsilon^{-1})$           |
|                  | <b>This work</b> | <b>Single-timescale</b> | Markovian | $\tilde{\mathcal{O}}(\varepsilon^{-2})$           | $\tilde{\mathcal{O}}(\varepsilon^{-\frac{3}{2}})$ |

Table 1: Comparison of some existing sample complexity results. The symbol  $\tilde{\mathcal{O}}(\cdot)$  hides the logarithmic terms.

## 1079 H Policy gradient theorem

1080 The following derivation establishes the policy gradient update of our algorithm.

$$\begin{aligned}
\nabla \mathbb{E}_{s_0 \sim \mu_0} [V_{\pi_\theta}(s_0)] &= \mathbb{E}_{s_0 \sim \mu_0} \left[ \nabla \sum_{a_0} \pi_\theta(a_0|s_0) Q_{\pi_\theta}(s_0, a_0) \right] \\
&= \mathbb{E}_{s_0 \sim \mu_0} \left[ \underbrace{\sum_{a_0} \nabla \pi_\theta(a_0|s_0) Q_{\pi_\theta}(s_0, a_0)}_{\text{1st term on RHS of (7)}} + \underbrace{\sum_{a_0} \pi_\theta(a_0|s_0) \nabla Q_{\pi_\theta}(s_0, a_0)}_{\text{2nd term on RHS of (7)}} \right] \\
&= \mathbb{E}_{s_0 \sim \mu_0} \left[ \sum_{a_0} \pi_\theta(a_0|s_0) \nabla \log \pi_\theta(a_0|s_0) Q_{\pi_\theta}(s_0, a_0) \right] \\
&\quad + \mathbb{E}_{s_0 \sim \mu_0} \left[ \sum_{a_0} \pi_\theta(a_0|s_0) \nabla \left( r(s_0, a_0) + \gamma \sum_{s_1} P(s_1|s_0, a_0) V_{\pi_\theta}(s_1) \right) \right] \\
&= \mathbb{E}_{s_0 \sim \mu_0} \left[ \sum_{a_0} \pi_\theta(a_0|s_0) \nabla \log \pi_\theta(a_0|s_0) Q_{\pi_\theta}(s_0, a_0) + \gamma \sum_{a_0, s_1} \pi_\theta(a_0|s_0) \nabla V_{\pi_\theta}(s_1) \right] \\
&= \mathbb{E}_\tau [Q_{\pi_\theta}(s_0, a_0) \nabla \log \pi_\theta(a_0|s_0)] + \gamma \mathbb{E}_\tau [\nabla V_{\pi_\theta}(s_1)],
\end{aligned}$$

1081 where the (7) in the second inequality refers to equation (7) of [4], and the expectation on  $\tau$  is taken  
1082 over a trajectory:  $a_0 \sim \pi_\theta(\cdot|s_0)$ ,  $s_1 \sim P(s_1|s_0, a_0)$ ,  $\dots$ . By expanding the above recursion, we can  
1083 derive the policy gradient

$$\begin{aligned}
\nabla \mathbb{E}_{s_0 \sim \mu_0} [V_{\pi_\theta}(s_0)] &= \mathbb{E}_\tau \left[ \sum_{k=0}^{\infty} \gamma^k Q_{\pi_\theta}(s_k, a_k) \nabla \log \pi_\theta(a_k, s_k) \right] \\
&= \frac{1}{1-\gamma} \mathbb{E}_{s \sim d_{\pi_\theta}, a \sim \pi_\theta} [Q_{\pi_\theta}(s, a) \nabla \log \pi_\theta(a|s)].
\end{aligned}$$

1084
